# Supplementary material for: Fecal transplant from myostatin deletion pigs positively impacts the gut-muscle axis
Source: eLife journal article supplement (doi:10.7554/elife.81858), 2023-04-11
Supplement: fig1-data1 [file fig.1c.xlsx]

## Sheet: fig1.c
	MSTN			psmad2/3			smad2/3			I			Iia			Iib			Myod			tubulin
	1	36832.5		1	11249.7	0.330027	1	31322.6	0.918899	1	21744.2		1	33466.5		1	18593.1		1	11885.1		1	34087.1
	2	32088.2		2	10355.2	0.277452	2	31202.5	0.836029	2	11291.2		2	28738.8		2	18672.1		2	18779		2	37322.3
	3	0		3	6659.38	0.175889	3	24042.9	0.635025	3	9419.02		3	25939.1		3	33605.8		3	36155.7		3	37861.3
	4	0		4	7770.28	0.264911	4	28386.4	0.967774	4	16479.6		4	13851.9		4	23714.6		4	36320.3		4	29331.7
	1	36321.2		1	36633.5	1.08364	1	59929.5	1.77275	1	34352.8		1	32951.6		1	12344.2		1	11689.3		1	33806
	2	32101.1		2	31860.8	0.863815	2	60507.6	1.64049	2	18602.4		2	30259.7		2	15507.4		2	18884.7		2	36883.9
	3	0		3	16855.8	0.451518	3	48621.5	1.30243	3	13783.8		3	24035		3	23669.8		3	36298.2		3	37331.3
	4	0		4	21476.1	0.741943	4	56272.5	1.94406	4	18934.7		4	14476.4		4	21532.8		4	38422.1		4	28945.8
		Relative to actin				Relative to total smad2/3					Relative to actin			Relative to actin			Relative to actin			Relative to actin
		1.08054		1.11379		0.359155		1.03949			0.637901		1.35661	0.981794		1.12089	0.545458		1.04319	0.348668		0.818636
		0.859759	0.97015	0.886213		0.331869	0.345512	0.960515			0.302532	0.470217	0.643389	0.770017	0.875905	0.87911	0.500295	0.522877	0.956812	0.503159	0.425913	1.18137
		0		0		0.276979		0.801648			0.248777		0.529068	0.685107		0.78217	0.887602		1.69754	0.95495		2.24213
		0		0		0.273732		0.79225			0.561837		1.19485	0.47225		0.539156	0.808498		1.54625	1.23826		2.90731
		1.0744		1.10494		0.611276		1.07445			1.01618		1.33661	0.974725		1.11282	0.365148		0.929618	0.345775		0.80621
		0.870329	0.972366	0.895063		0.526559	0.568918	0.925545			0.50435	0.760263	0.663389	0.820405	0.897565	0.936636	0.420438	0.392793	1.07038	0.512004	0.42889	1.19379
		0		0		0.346674		0.609356			0.369229		0.485659	0.643828		0.735044	0.634047		1.6142	0.972326		2.26708
		0		0		0.381645		0.670827			0.654143		0.860416	0.500122		0.570978	0.743902		1.89388	1.32738		3.09492
		WT	KO	ttest
	MSTN	1.11379	0
		0.886213	0
		1.10494	0
		0.895063	0	4.03896e-06
	P-Smad2/3/Smad2/3	1.03949	0.801648
		0.960515	0.79225
		1.07445	0.609356
		0.925545	0.670827	0.00290814
	I	1.35661	0.529068
		0.643389	1.19485
		1.33661	0.485659
		0.663389	0.860416	0.404896
	IIa	1.12089	0.78217
		0.87911	0.539156
		1.11282	0.735044
		0.936636	0.570978	0.00606426
	IIb	1.04319	1.69754
		0.956812	1.54625
		0.929618	1.6142
		1.07038	1.89388	0.000161379
	Myod	0.818636	2.24213
		1.18137	2.90731
		0.80621	2.26708
		1.19379	3.09492	0.000552399
