# Supplementary material for: Fecal transplant from myostatin deletion pigs positively impacts the gut-muscle axis
Source: eLife journal article supplement (doi:10.7554/elife.81858), 2023-04-11
Supplement: fig1-data1 [file fig.1d.xlsx]

## Sheet: fig1.d
	HK2			PFK1			PKM2			actin
	1	19576.6		1	17415.7		1	13525.7		1	15688.3
	2	21751.5		2	19882.6		2	16091		2	15415.8
	3	35735.7		3	23307.6		3	22686.6		3	14786.5
	4	35708.4		4	38050		4	41538.6		4	15448.8
	1	21773.1		1	18831		1	14712.2		1	37702.5
	2	23952.6		2	21288.3		2	18192.5		2	36568.6
	3	37800.1		3	26227.9		3	25599.8		3	35156.8
	4	38153.7		4	36567.3		4	41693.4		4	36944.3
		Relative to actin			Relative to actin			Relative to actin
		1.24784		0.93864	1.1101		0.925142	0.862147		0.904693
		1.41099	1.32941	1.06136	1.28975	1.19993	1.07486	1.0438	0.952972	1.09531
		2.41679		1.81793	1.57628		1.31364	1.53428		1.60999
		2.3114		1.73866	2.46297		2.0526	2.68879		2.82148
		0.577497		0.937113	0.499462		0.923553	0.390218		0.87916
		0.655005	0.616251	1.06289	0.582147	0.540805	1.07645	0.497489	0.443854	1.12084
		1.07519		1.74472	0.746026		1.37947	0.72816		1.64054
		1.03274		1.67584	0.989795		1.83023	1.12855		2.54261
		WT	KO	ttest
	HK2	0.93864	1.81793
		1.06136	1.73866
		0.937113	1.74472
		1.06289	1.67584	3.62257e-06
	PFK1	0.925142	1.31364
		1.07486	2.0526
		0.923553	1.37947
		1.07645	1.83023	0.012651
	PKM2	0.904693	1.60999
		1.09531	2.82148
		0.87916	1.64054
		1.12084	2.54261	0.0107978
