# Supplementary material for: Fecal transplant from myostatin deletion pigs positively impacts the gut-muscle axis
Source: eLife journal article supplement (doi:10.7554/elife.81858), 2023-04-11
Supplement: fig1-data1 [file Fig1.b.xlsx]

## Sheet: fig1.b1
WT1				WT2				WT3				WT4				KO1				KO2				KO3				KO4
Average	1846.69	1536.05	1691.37	Average	1655.68	1496.81	1576.24	Average	1558.69	1448.69	1503.69	Average	1660.38	1353.26	1506.82	Average	2414.38	2344.69	2379.54	Average	2275.71	2059.01	2167.36	Average	2336.76	2319.66	2328.21	Average	1954.93	1716.31	1835.62
Area	1920.58	2670.84		Area	1464.83	2392.87		Area	2073.95	1850.64		Area	1810.32	1319.91		Area	2802.37	2652.02		Area	2450.63	2274.14		Area	3980.6	1903.69		Area	1390.61	919.365
Area	2225.85	2441.9		Area	1266.13	1881.11		Area	1963.19	1565.05		Area	955.501	1670.31		Area	3593.1	3635.04		Area	3127.29	2636.66		Area	2342.37	2078.06		Area	1684.06	2061.58
Area	1448.71	1902.99		Area	2170.12	2015.73		Area	1258.76	1240.69		Area	1810.1	608.155		Area	2467.72	3650.27		Area	1497.13	2743.35		Area	2120.23	1884.16		Area	1912.01	1977.92
Area	2219.95	1523.5		Area	1392.67	1992.33		Area	940.82	1418.94		Area	1756.37	1188.06		Area	1768.12	2346.4		Area	2551.02	1462.27		Area	736.74	1629.73		Area	2125.33	1794.41
Area	1485.83	2731.36		Area	1728.5	964.378		Area	1222.94	1795.1		Area	2228.5	1177.67		Area	3859.07	2238.75		Area	4098.08	2121.67		Area	2043.81	2229.44		Area	1003.93	2143.29
Area	1881.28	1320.32		Area	1910.93	2905.6		Area	1350.67	1508.13		Area	2364.33	329.631		Area	2667.92	2128.13		Area	2173.02	1375.14		Area	2116.22	1971.55		Area	1898.8	1667.13
Area	1837.06	1978.2		Area	1838.55	1246.09		Area	1505.95	2358.52		Area	1291.47	1164.79		Area	2925.12	2690.53		Area	2804.94	2352.67		Area	1719.21	1956.18		Area	2400	1547.74
Area	2470.63	2163.37		Area	2488.48	1512.7		Area	1645.03	1066.73		Area	1443.76	1347.05		Area	1527.53	4115.88		Area	2853.32	3693.68		Area	2239.59	1101.91		Area	1060.92	1779.31
Area	1638.57	1529.32		Area	1050.51	2078.2		Area	1481.49	962.577		Area	1416.18	1746.77		Area	2516.74	1981.27		Area	1458.12	1608.22		Area	2009.1	1841.36		Area	2000	1950.22
Area	2374.33	1771.83		Area	1111.21	763.691		Area	1585.74	1419.91		Area	750.807	1091.8		Area	2532.42	2589.88		Area	1922.42	2181.88		Area	2238.7	1631.26		Area	1113.97	985.984
Area	1373.59	1524.75		Area	1092.32	678.929		Area	1600.95	2111.71		Area	1429.3	1619.62		Area	854.501	3396.64		Area	1953.6	2607.52		Area	3534.42	2175.56		Area	1844.65	923.52
Area	2103.46	1429.46		Area	796.45	1303.43		Area	1890.35	1303.29		Area	1157.41	1480.01		Area	2517.27	2475.76		Area	2453.71	3205.47		Area	3407.83	2587.74		Area	1958.3	2190.38
Area	2720.76	815.905		Area	1594.86	619.789		Area	1360.04	920.889		Area	1451.66	1279.33		Area	2762.25	2311.75		Area	3221.51	2899.42		Area	2785.55	1550.93		Area	1790.72	1362.57
Area	2446.61	1952.58		Area	1674.45	803.856		Area	988.98	2138.86		Area	1069.64	1414.37		Area	3696.46	2849.12		Area	1347.48	2272.62		Area	1211.18	2925.27		Area	2086.24	2249.66
Area	405.821	704.551		Area	2014.43	1259.8		Area	1296.34	2492.73		Area	1277.34	1613.25		Area	441.731	1810.08		Area	3226.69	1389.15		Area	1886.07	926.29		Area	2242.14	1683.06
Area	1010.46	1834.16		Area	1648.14	1662.14		Area	1615.61	1414.78		Area	1737.23	1283.76		Area	3408.44	2050.24		Area	2372.6	2472.81		Area	1998.98	1667.96		Area	2248.14	1590.54
Area	2392.02	1928.76		Area	1623.47	1639.71		Area	1811.33	903.853		Area	1259.43	1138.33		Area	2601.9	1534.57		Area	2977.3	2260.13		Area	2223.01	2311.15		Area	1824.02	1863.8
Area	634.99	2700.89		Area	2452.78	1394.98		Area	1429.8	1243.87		Area	1866.61	739.315		Area	3048.81	2286.89		Area	2499.56	769.979		Area	3059.98	2848.54		Area	2012.12	1810.34
Area	1759.98	670.757		Area	2022.62	972.134		Area	1024.02	890.834		Area	1046.61	1266.72		Area	1242.83	1768.25		Area	2148.78	3269.29		Area	1166.13	3496.58		Area	2306.33	557.602
Area	2136.54	1763.8		Area	1865.84	1012.71		Area	1096.54	822.138		Area	2226.5	1570.32		Area	2048.17	1886.75		Area	768.239	2771.92		Area	1828.33	2865.85		Area	1095.85	2341.21
Area	2613.55	2153.82		Area	1751.53	1162.29		Area	1340.42	623.805		Area	1307.82	2125.56		Area	1994.5	3090.67		Area	675.667	1949.37		Area	1963.94	2760.73		Area	2326.42	2468.35
Area	2889.77	1719.34		Area	2083.32	756.904		Area	1728.57	809.673		Area	1227.61	1596.08		Area	2229.78	3363.91		Area	1635.99	2136.93		Area	1722.66	3307.53		Area	1941.16	1918.23
Area	1478.4	1679.04		Area	2256.7	1317.42		Area	1160.46	1560.62		Area	2376.24	1651.06		Area	2481.93	2345.35		Area	3472.34	1323.95		Area	1040.54	3316.81		Area	2018.89	1595.52
Area	2123.33	1984.02		Area	1391.47	1592.06		Area	1244.99	2136.92		Area	1675.6	2082.08		Area	532.602	2423.07		Area	1554.77	2125.28		Area	2957.31	2311.85		Area	1988.97	2142.88
Area	2279.02	614.11		Area	1575.54	1452.59		Area	2031.85	1666.02		Area	1797.09	1038.2		Area	4307.44	2526.52		Area	2887.48	1397.62		Area	2905.91	2708.24		Area	1539.19	1037.64
Area	1998.43	987.646		Area	1365.48	2159.64		Area	1058.08	964.655		Area	1505.51	2331.65		Area	3955.39	1868.72		Area	2117.59	2775.12		Area	3906.63	959.392		Area	1756.99	1544
Area	1627.98	599.014		Area	1670.09	1958.95		Area	1785.32	2002.71		Area	1388.59	1785.41		Area	2797.06	2005.43		Area	2165.86	3976.01		Area	2683.88	2247.03		Area	2396.62	953.436
Area	2842.06	1395.39		Area	2047.19	1239.72		Area	1428.26	2007.7		Area	1933.36	887.787		Area	2356.52	869.596		Area	2520.17	1799.95		Area	1912.21	1751.89		Area	1751.64	960.638
Area	1830.07	1712.56		Area	2103.3	1485.14		Area	1219.86	615.495		Area	1494.72	600.537		Area	1113.43	1516.72		Area	2290.28	1907.74		Area	2378.97	3960.97		Area	1429.93	1936.37
Area	1691.2	2306.03		Area	1385.03	1473.92		Area	1865.88	1096.23		Area	1425.19	1237.08		Area	2543.58	1358.48		Area	1643.05	698.392		Area	2798.46	1732.5		Area	1022.36	3668.18
Area	2617.7	1602.31		Area	2182.57	1589.43		Area	1489.75	1334.17		Area	1356.44	2300.77		Area	1364.52	2362.33		Area	1948.64	658.436		Area	1823.55	1931.25		Area	1607.56	2009.09
Area	1369.99	2143.98		Area	2129.62	2416		Area	960.877	1570.73		Area	2240.74	1151.77		Area	1900.31	3200.42		Area	1870.73	1374.86		Area	1717.99	1616.85		Area	1372.39	1762.83
Area	782.055	1883.74		Area	2076.88	2157.14		Area	1536.04	1493.03		Area	1357.88	722.002		Area	2437.96	1288.64		Area	1678.64	2094.07		Area	2384.2	1794.96		Area	1246.4	1853.27
Area	1502.75	648.32		Area	1506.21	1367.55		Area	2644.04	1868.78		Area	2665.15	1227.53		Area	1816.88	2801.86		Area	2638.86	974.197		Area	3423.07	2419.6		Area	1417.14	1328.22
Area	2842.28	1009.11		Area	797.432	2092.74		Area	2223.61	1215.76		Area	1448.1	1277.94		Area	2558.06	2578.16		Area	2286.75	2529.28		Area	1919.11	3784.66		Area	1307.72	1589.01
Area	1719.15	1640.12		Area	1543.01	1680.15		Area	1603.59	669.372		Area	1883.3	2231.79		Area	2428.13	1589.36		Area	792.374	1600.72		Area	1530.99	3261.27		Area	3489.63	1473.5
Area	1604.62	1658.96		Area	1602.94	1420.32		Area	1774.3	1660.62		Area	1295.14	1787.21		Area	3209.16	1195.17		Area	1512.56	1663.99		Area	3154.98	5493.34		Area	2444.32	1509.1
Area	1517.82	941.664		Area	1399.65	1600.09		Area	1520.94	1274.9		Area	2378.57	1523.5		Area	1626.24	3445.3		Area	3449.31	1746.12		Area	3172.78	2340.1		Area	2713.36	1391.37
Area	2034.78	1099.97		Area	1735.81	1293.59		Area	1385.06	1236.67		Area	1409.61	1346.92		Area	1609.5	2454.05		Area	1128.06	1187.71		Area	929.741	1439.3		Area	2315.59	1310.06
Area	1429.93	744.578		Area	2170.88	1829.59		Area	1243.44	1998.56		Area	1327.51	2432.62		Area	1749.39	1105.72		Area	2693.85	1323.81		Area	2462.29	2064.76		Area	2477.91	1332.27
Area	710.542	1326.28		Area	1477.61	1605.5		Area	2066.34	1238.61		Area	2183.67	1305.09		Area	2504.78			Area	2370.07	2393.73		Area	3765.13			Area	2201.88	1452.03
Area	1997.66	2580.68		Area	1581.98	1138.89		Area	2011.24	1663.11		Area	1857.71	1721.7		Area	3319.56			Area	1588.72	1801.06		Area	2233.69			Area	2061.58	2844.8
Area	1607.56	1417.97		Area	2068.69	1103.85		Area	1418.67	1512.84		Area	2063.86	1100.94		Area	2105.3			Area	2608.44	2731.14		Area	3693.49			Area	2242.46	1912.01
Area	1832.37	2123.21		Area	1365.26	587.103		Area	1840.42	1349.55		Area	1219.16	581.009		Area	3618.21			Area	4010.8			Area	2632.15				2400	2125.33
Area	1372.39	2551.45		Area	1503.37	1689.84		Area	2419.55	1506.33		Area	2201.47	1323.09		Area	3345.87			Area	3713.47			Area	2166.61				3192.03
Area	1984.45	356.361		Area	989.366	2022.94		Area	2116.49	1260.08		Area	1489.93	1823.63		Area	1107.32			Area	1890.13			Area	1562.69				2582.31
Area	1564.11	783.635		Area	1633.19	1417.14		Area	1516.2	1532.51		Area	2076.43	2295.5		Area	943.777			Area	2033.94								2639.08
Area	2290.05	1174.9		Area	1323.23	1650.51		Area	1186.03	1679.59		Area	1826.01	786.405		Area	3117.89			Area	2788.74
		698.457		Area	1397.47	1310.07		Area	1749.72	1217.14		Area	2233.06	2329.3		Area	2295.81			Area	1790.17
		511.759		Area	1461.78	1332.37		Area	1505.07	1616.85		Area	1997.66	1607.71		Area	3420.4			Area	2488.87
		960.223				1452.04		Area	2161.12	1712.14		Area	2159.08	616.603		Area	3059.84			Area	2265.15
		1506.74				1378.49		Area	1508.82	1915.18		Area	1767.6	1761.17						Area	1919.88
								Area	1389.13	1340.96		Area	1593.95	1119.78
								Area	1302.29			Area	1498.94	1240.69
								Area	1149			Area	1219.94	578.377
												Area	2107.46	557.187
												Area	1701.64	1419.35
												Area	1635.67	1598.99
												Area	1228.28	1460.9
												Area	1959.51	2262.26
												Area	1418.85	1683.61
														2052.99
														1958.67
														1958.12
														2087.2
														1202.18
														1399.96
														1075.59
														646.519
														1255.23
														1640.4
	WT	MSTN												1267.97
1	1691.37	2379.54												1716.3
2	1576.24	2167.36												1521.98
3	1503.69	2328.21												718.401
4	1486.13	1835.62												466.331
ttest		0.00341576												400.82
Average	1564.36	2177.68												464.807
SE	46.6135	122.65												537.381
														330.185

## Sheet: fig1.b2
	KO1		KO2		KO3		KO4		WT1		WT2		WT3		WT4
	2383.75		2177.62		2328.8		2064.73		1536.39		1406.55		1334.73		1486.13
	441.731		658.436		736.74		553.863		332.678		449.988		309.687		329.631
	532.602		675.667		926.29		557.602		356.361		469.136		338.356		330.185
	854.501		698.392		929.741		919.365		405.821		513.559		346.666		400.82
	869.596		768.239		959.392		923.52		511.759		552.478		405.113		464.807
	943.777		769.979		1040.54		953.436		599.014	2	559.818		407.883		466.331
	1105.72		792.374		1101.91		960.638		614.11	30	587.103		412.177		537.381
	1107.32		974.197		1166.13		985.984		632.588	59	590.288		425.057		557.187
	1113.43		1128.06		1211.18		1003.93		634.99	32	619.789		440.431		578.377
	1195.17		1187.71		1439.3		1037.64		648.32	22	658.154		447.633		581.009
	1242.83		1323.81		1530.99		1060.92		651.149	1	678.929		464.807		600.537
	1288.64		1323.95		1550.93		1095.85		662.94		756.904		526.855		608.155
	1358.48		1347.48		1562.69		1113.97		670.757		763.691		544.168		616.603
	1364.52		1374.86		1616.85		1328.22		698.457		796.1		567.297		646.519
	1516.72		1375.14		1629.73		1362.57		704.551		796.45		615.495		718.401
	1527.53		1389.15		1631.26		1390.61		710.542		797.432		623.805		722.002
	1534.57		1397.62		1667.96		1473.5		744.578		803.856		669.372		739.315
	1589.36		1458.12		1717.99		1509.1		747.227		880.031		798.731		750.807
	1609.5		1462.27		1719.21		1539.19		782.055		892.219		809.673		786.405
	1626.24		1497.13		1722.66		1544		783.635		913.271		822.138		887.787
	1749.39		1512.56		1732.5		1547.74		815.905		929.337		875.322		955.501
	1768.12		1554.77		1751.89		1589.01		903.136		944.988		877.815		1038.2
	1768.25		1588.72		1794.96		1590.54		921.696		950.805		890.834		1046.61
	1810.08		1600.72		1823.55		1595.52		941.664		961.469		903.853		1069.64
	1816.88		1608.22		1828.33		1667.13		960.223		963.491		920.889		1075.59
	1868.72		1635.99		1841.36		1683.06		987.646		964.378		921.027		1091.8
	1886.75		1643.05		1884.16		1684.06		1009.11		966.04		930.861		1100.94
	1900.31		1663.99		1886.07		1731.66		1010.46		972.134		940.82		1119.78
	1981.27		1678.64		1903.69		1748.8		1010.46		977.029		960.877		1138.33
	1994.5		1746.12		1912.21		1751.64		1010.68		984.599		962.577		1151.77
	2005.43		1790.17		1919.11		1756.99		1022.36		986.122		964.655		1157.41
	2048.17		1799.95		1931.25		1762.83		1026.29		989.366		988.061		1164.79
	2050.24		1801.06		1956.18		1779.31		1063.74		998.033		988.98		1177.67
	2105.3		1870.73		1963.94		1790.72		1067.56		1012.71		1000.66		1188.06
	2128.13		1890.13		1971.55		1794.41		1085.29		1032.6		1004.27		1202.18
	2229.78		1907.74		1998.98		1810.34		1099.97		1050.51		1014.93		1219.16
	2238.75		1919.88		2009.1		1824.02		1147.34		1065.9		1019.78		1219.94
	2286.89		1922.42		2043.81		1844.65		1161.89		1066.55		1024.02		1227.53
	2295.81		1948.64		2064.76		1853.27		1163.68		1092.32		1026.15		1227.61
	2311.75		1949.37		2078.06		1863.8		1164.29		1103.85		1027.26		1228.28
	2345.35		1953.6		2116.22		1898.8		1174.9		1109.11		1032.66		1237.08
	2346.4		2033.94		2120.23		1912.01		1192.57		1111.21		1053.57		1240.69
	2356.52		2094.07		2166.61		1918.23		1196.07		1138.89		1058.08		1255.23
	2362.33		2117.59		2175.56		1936.37		1204.95		1145.67		1066.45		1259.43
	2423.07		2121.67		2223.01		1941.16		1219.36		1146.37		1066.73		1266.72
	2428.13		2125.28		2229.44		1950.22		1224.23		1154.82		1096.23		1267.97
	2437.96		2136.93		2233.69		1958.3		1233.62		1157.72		1096.54		1277.34
	2454.05		2148.78		2238.7		1977.92		1246.4		1162.29		1115.62		1277.94
	2467.72		2165.86		2239.59		1988.97		1255.46		1187.64		1130.58		1279.33
	2475.76		2173.02		2247.03		2000		1257.53		1196.15		1133.76		1283.76
	2481.93		2181.88		2311.15		2009.09		1264.41		1198.22		1135.56		1291.47
	2504.78		2260.13		2311.85		2012.12		1285.81		1207.5		1146.64		1295.14
	2516.74		2265.15		2340.1		2018.89		1288.87		1227.81		1149		1305.09
	2517.27		2272.62		2342.37		2061.58		1309.61		1239.72		1160.46		1307.82
	2526.52		2274.14		2378.97		2086.24		1320.32		1246.09		1186.03		1319.91
	2532.42		2286.75		2384.2		2125.33		1326.28		1251.72		1186.81		1323.09
	2543.58		2290.28		2419.6		2142.88		1333.48		1255.43		1215.76		1327.51
	2558.06		2352.67		2462.29		2143.29		1369.99		1257.29		1217.14		1346.92
	2578.16		2370.07		2587.74		2190.38		1372.39		1257.58		1219.86		1347.05
	2589.88		2372.6		2632.15		2201.88		1373.59		1259.8		1222.94		1356.44
	2601.9		2393.73		2683.88		2242.14		1395.39		1259.8		1235.01		1357.88
	2652.02		2450.63		2708.24		2242.46		1417.97		1266.13		1236.67		1388.59
	2667.92		2453.71		2760.73		2248.14		1429.46		1293.59		1238.61		1399.96
	2690.53		2472.81		2785.55		2249.66		1429.93		1295.25		1240.69		1409.61
	2762.25		2488.87		2798.46		2306.33		1448.71		1297.47		1243.44		1414.37
	2797.06		2499.56		2848.54		2315.59		1478.4		1303.43		1243.87		1416.18
	2801.86		2520.17		2865.85		2326.42		1485.83		1307.72		1244.99		1418.85
	2802.37		2529.28		2905.91		2341.21		1502.75		1310.07		1258.76		1419.35
	2849.12		2551.02		2925.27		2366.7		1506.74		1317.42		1260.08		1425.19
	2925.12		2607.52		2957.31		2396.62		1517.82		1323.23		1274.9		1429.3
	3048.81		2608.44		3059.98		2400		1523.5		1331.31		1296.34		1443.76
	3059.84		2636.66		3154.98		2444.32		1524.75		1332.37		1302.29		1448.1
	3090.67		2638.86		3172.78		2468.35		1529.32		1365.26		1303.29		1451.66
	3117.89		2693.85		3261.27		2477.91		1564.11		1365.48		1334.17		1460.9
	3200.42		2731.14		3307.53		2481		1602.31		1367.55		1340.42		1480.01
	3209.16		2743.35		3316.81		2582.31		1604.62		1378.49		1340.96		1489.93
	3319.56		2771.92		3407.83		2629.8		1607.56		1385.03		1349.55		1494.72
	3345.87		2775.12		3423.07		2639.08		1627.98		1391.37		1350.67		1498.94
	3363.91		2788.74		3496.58		2668.56		1638.57		1391.47		1360.04		1505.51
	3396.64		2804.94		3534.42		2688.32		1640.12		1392.67		1385.06		1521.98
	3408.44		2853.32		3693.49		2713.36		1658.96		1394.98		1389.13		1523.5
	3420.4		2887.48		3765.13		2844.8		1679.04		1397.47		1414.78		1570.32
	3445.3		2899.42		3784.66		2887.23		1691.2		1399.65		1418.67		1593.95
	3593.1		2977.3		3906.63		2891.89		1712.56		1417.14		1418.94		1596.08
	3618.21		3127.29		3960.97		2925.33		1719.15		1420.32		1419.91		1598.99
	3635.04		3205.47		3980.6		2935.38		1719.34		1452.04		1428.26		1607.71
	3650.27		3221.51		5493.34		3192.03		1759.98		1452.59		1429.8		1613.25
	3696.46		3226.69				3392.43		1763.8		1461.78		1481.49		1619.62
	3859.07		3269.29				3408.63		1771.83		1464.83		1489.75		1635.67
	3955.39		3449.31				3453.23		1830.07		1473.92		1493.03		1640.4
	4115.88		3472.34				3489.63		1832.37		1477.61		1505.07		1651.06
	4307.44		3693.68				3545.85		1834.16		1485.14		1505.95		1670.31
			3713.47				3668.18		1837.06		1503.37		1506.33		1675.6
			3976.01				3840.07		1881.28		1506.21		1508.13		1683.61
			4010.8				3924.24		1883.74		1512.7		1508.82		1701.64
			4098.08						1902.99		1543.01		1512.84		1716.3
									1920.58		1575.54		1516.2		1721.7
									1928.76		1581.98		1520.94		1737.23
									1952.58		1589.43		1532.51		1746.77
									1978.2		1592.06		1536.04		1756.37
									1984.02		1594.86		1560.62		1761.17
									1984.45		1600.09		1565.05		1767.6
									1997.66		1602.94		1570.73		1785.41
									1998.43		1605.5		1585.74		1787.21
									2034.78		1623.47		1600.95		1797.09
									2103.46		1633.19		1603.59		1810.1
									2123.21		1639.71		1615.61		1810.32
									2123.33		1648.14		1616.85		1823.63
									2136.54		1650.51		1645.03		1826.01
									2143.98		1662.14		1660.62		1857.71
									2153.82		1670.09		1663.11		1866.61
									2163.37		1674.45		1666.02		1883.3
									2219.95		1680.15		1679.59		1933.36
									2225.85		1689.84		1712.14		1958.12
									2279.02		1728.5		1728.57		1958.67
									2290.05		1735.81		1749.72		1959.51
									2306.03		1751.53		1774.3		1997.66
									2374.33		1829.59		1785.32		2052.99
									2392.02		1838.55		1795.1		2063.86
									2441.9		1865.84	10	1811.33		2076.43
									2446.61		1881.11	22	1840.42		2082.08
									2470.63		1910.93	57	1850.64		2087.2
									2551.45		1958.95	38	1865.88		2107.46
									2580.68		1992.33	15	1868.78		2125.56
									2613.55		2014.43	1	1890.35		2159.08
									2617.7		2015.73		1915.18		2183.67
									2670.84		2022.62		1963.19		2201.47
									2700.89		2022.94		1998.56		2226.5
									2720.76		2047.19		2002.71		2228.5
									2731.36		2068.69		2007.7		2231.79
									2842.06		2076.88		2011.24		2233.06
									2842.28		2078.2		2031.85		2240.74
									2889.77		2083.32		2066.34		2262.26
											2092.74		2073.95		2295.5
											2103.3		2111.71		2300.77
											2129.62		2116.49		2329.3
											2157.14		2136.92		2331.65
											2159.64		2138.86		2364.33
											2170.12		2161.12		2376.24
											2170.88		2223.61		2378.57
											2182.57		2358.52		2432.62
											2256.7		2419.55		2665.15
											2392.87		2492.73
											2416		2644.04
											2452.78
											2488.48
											2905.6
Percent of fibers
total	91	95	86	94	132	146	143	141
size	500	1000	1500	2000	2500	3000	3500	4000
KO1	5	8	16	21	19	13	7	2
KO2	1	8	13	22	25	17	7	2
KO3	5	6	25	21	12	9	7	1
KO4	7	9	33	25	11	5	4	0
WT1	3	22	41	37	18	11	0	0
WT2	2	30	59	32	22	1	0	0
WT3	10	22	57	38	15	1	0	0
WT4	5	15	57	39	24	1	0	0
KO1	5.49451	8.79121	17.5824	23.0769	20.8791	14.2857	7.69231	2.1978
KO2	1.05263	8.42105	13.6842	23.1579	26.3158	17.8947	7.36842	2.10526
KO3	5.81395	6.97674	29.0698	24.4186	13.9535	10.4651	8.13953	1.16279
KO4	7.44681	9.57447	35.1064	26.5957	11.7021	5.31915	4.25532	0
WT1	2.27273	16.6667	31.0606	28.0303	13.6364	8.33333	0	0
WT2	1.36986	20.5479	40.411	21.9178	15.0685	0.684932	0	0
WT3	6.99301	15.3846	39.8601	26.5734	10.4895	0.699301	0	0
WT4	3.5461	10.6383	40.4255	27.6596	17.0213	0.70922	0	0
