# Supplementary material for: Fecal transplant from myostatin deletion pigs positively impacts the gut-muscle axis
Source: eLife journal article supplement (doi:10.7554/elife.81858), 2023-04-11
Supplement: fig1-data1 [file fig1.g.xlsx]

## Sheet: fig1.g
		Treponema	Romboutsia	Turicibacter
WT	ybc1	0.305028	3.88472	2.20181
	ybc2	0.29451	1.37087	1.10441
	ybc3	0.0631092	0.382161	0.143749
	ybc4	0.0105182	0.911577	0.189328
	ybc5	1.05182	2.16324	1.24816
MSTN	ybm1	2.53489	6.97356	2.1948
	ybm2	7.53804	4.41414	1.79861
	ybm3	2.79433	5.48699	3.69539
	ybm4	2.47178	4.31947	2.15272
	ybm5	2.11416	5.65879	2.26141
Average	WT	0.344997	1.74251	0.977491
	MSTN	3.49064	5.37059	2.42059
Ttest		0.0160519	0.00162667	0.0209027
SE	WT	0.186424	0.610131	0.381094
SE	MSTN	1.01766	0.484034	0.328637
