# Supplementary material for: Fecal transplant from myostatin deletion pigs positively impacts the gut-muscle axis
Source: eLife journal article supplement (doi:10.7554/elife.81858), 2023-04-11

Figure 1C source data

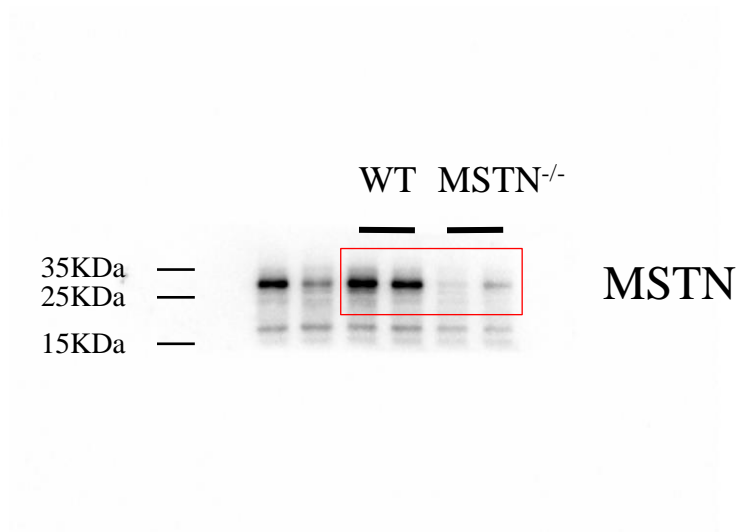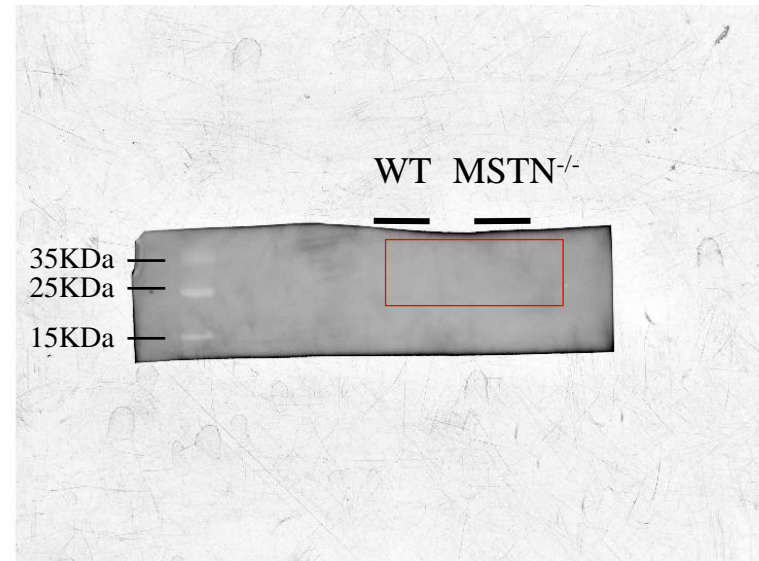

Figure 1C source data

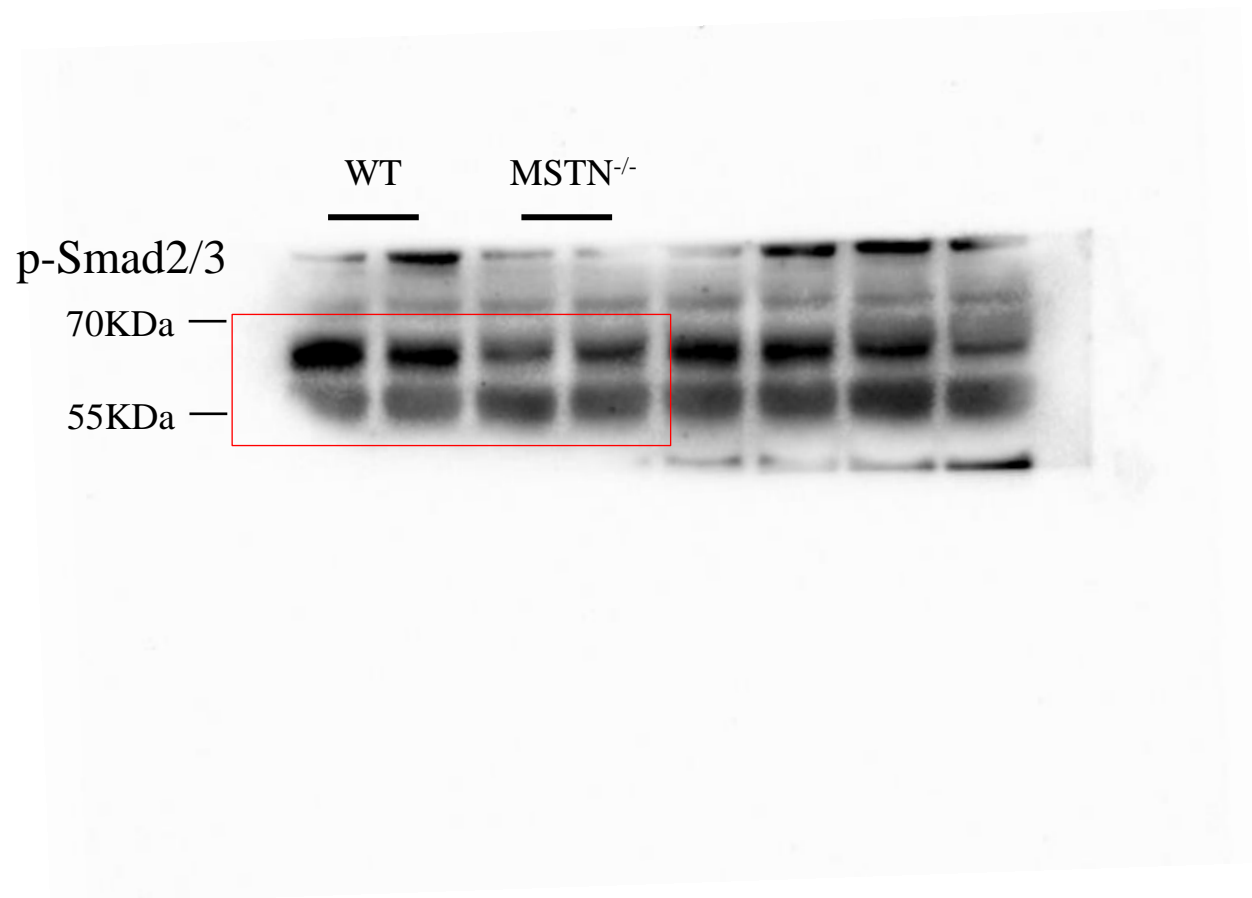

Figure 1C source data

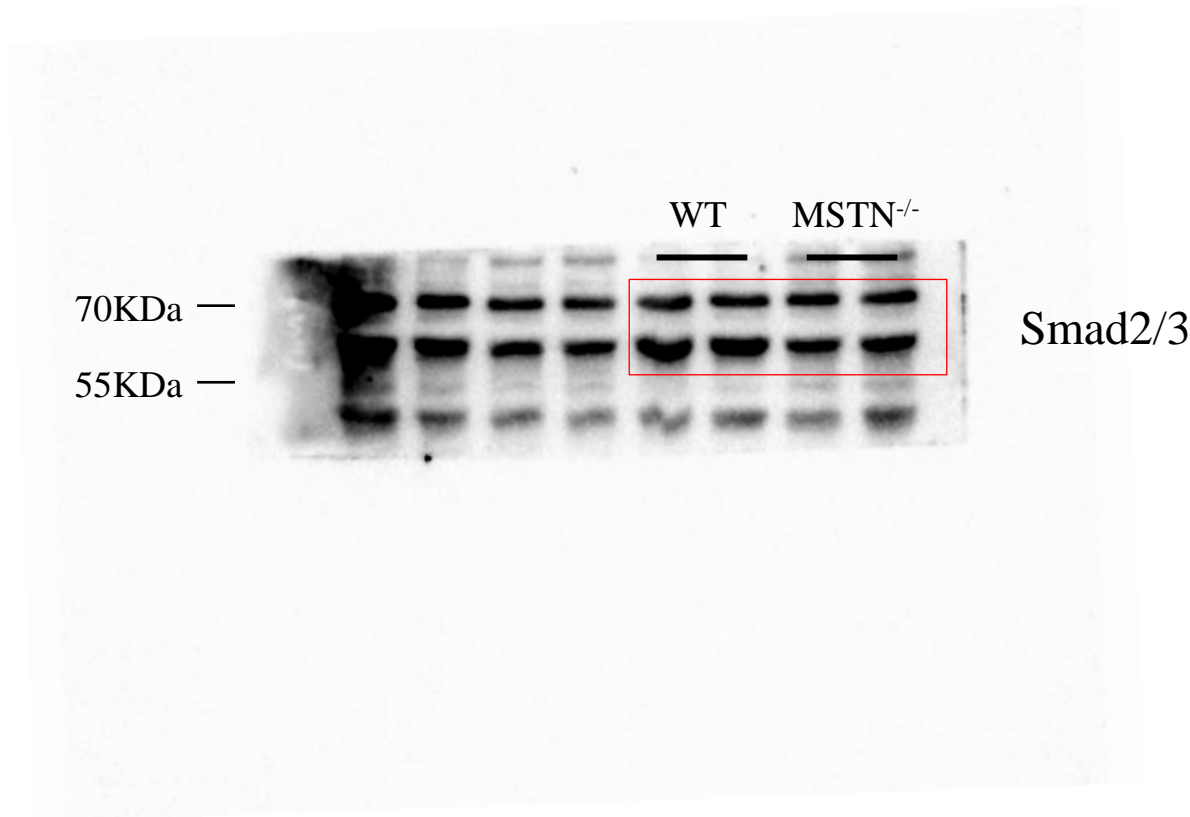

Figure 1C source data

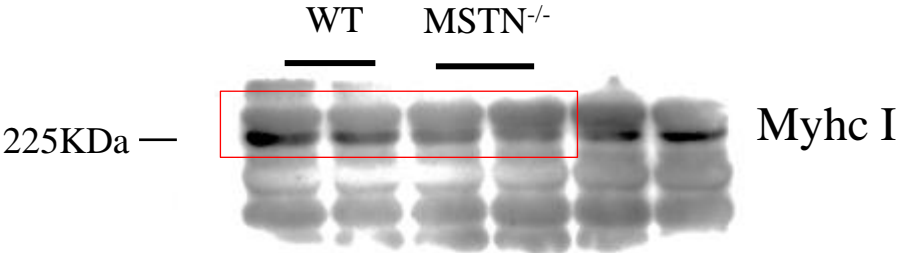

Figure 1C source data

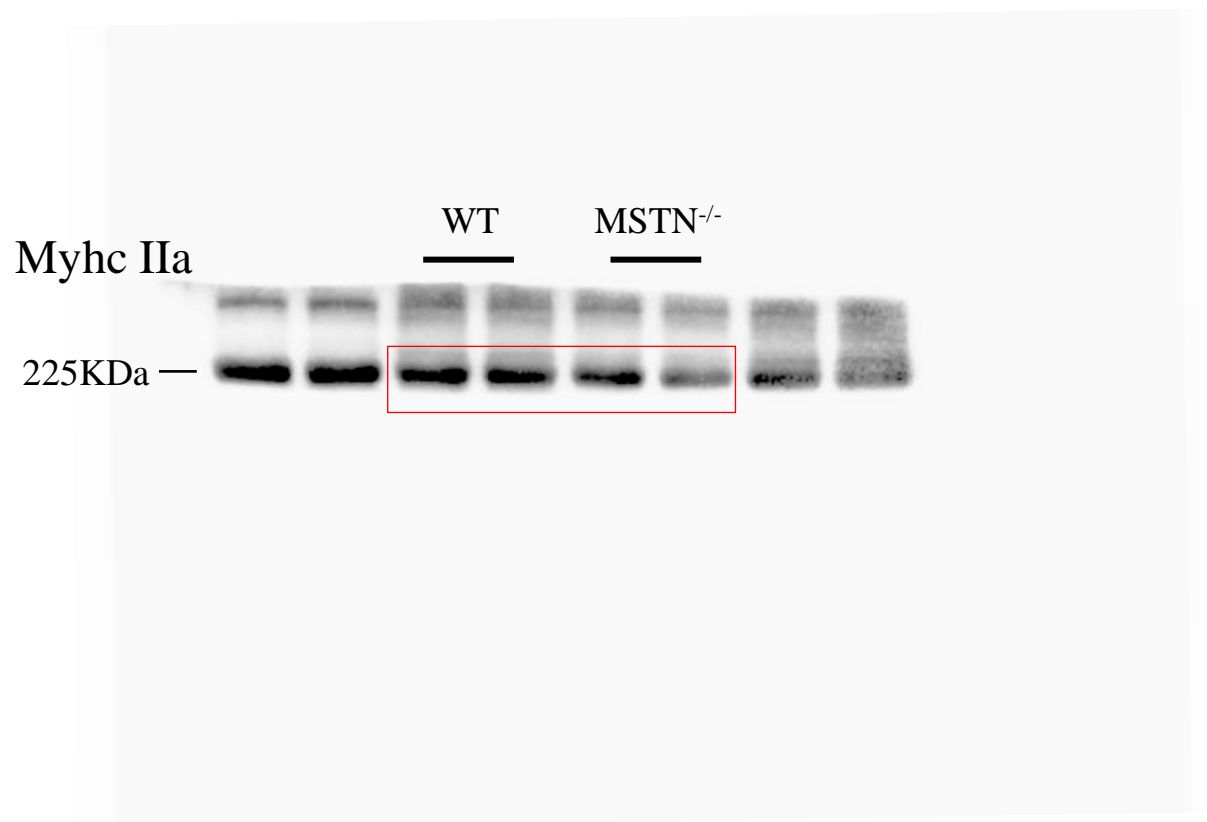

Figure 1C source data

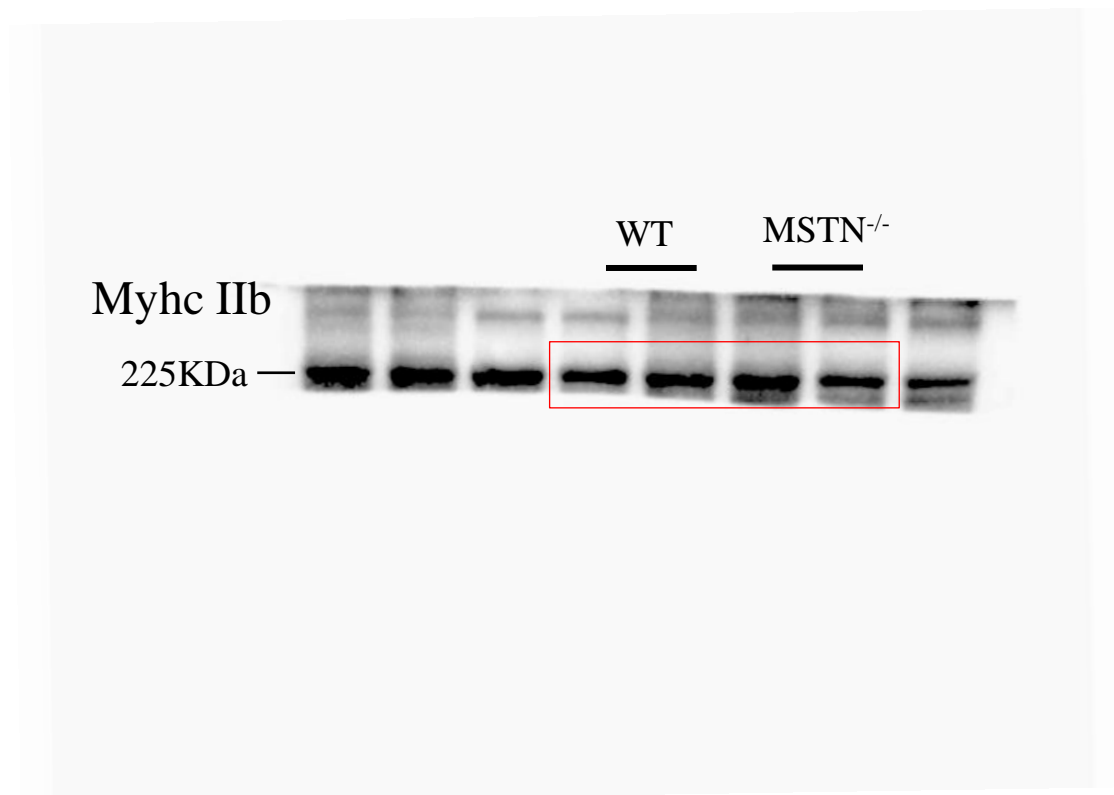

Figure 1C source data

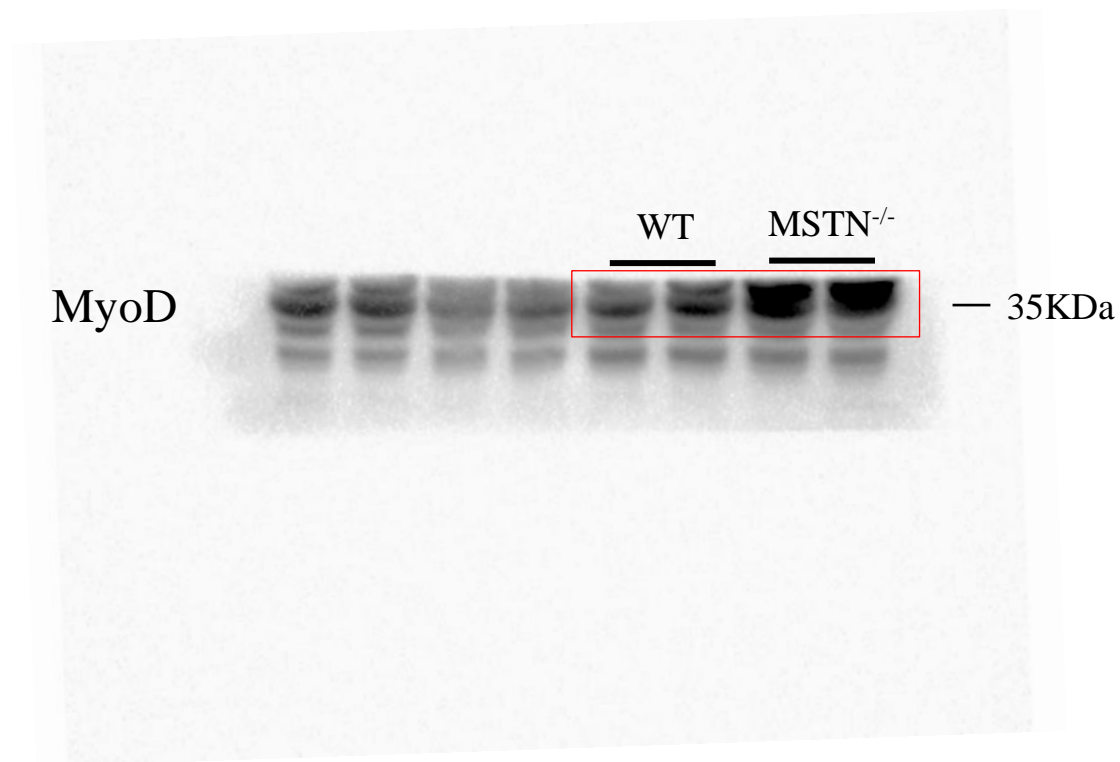

Western blot analysis of tubulin (55KDa) in WT and MSTN<sup>-/-</sup> mice. The blot shows tubulin bands for both genotypes, with a red box highlighting the tubulin bands in the WT lanes.

55KDa —

MSTN<sup>-/-</sup>



Figure 1D source data

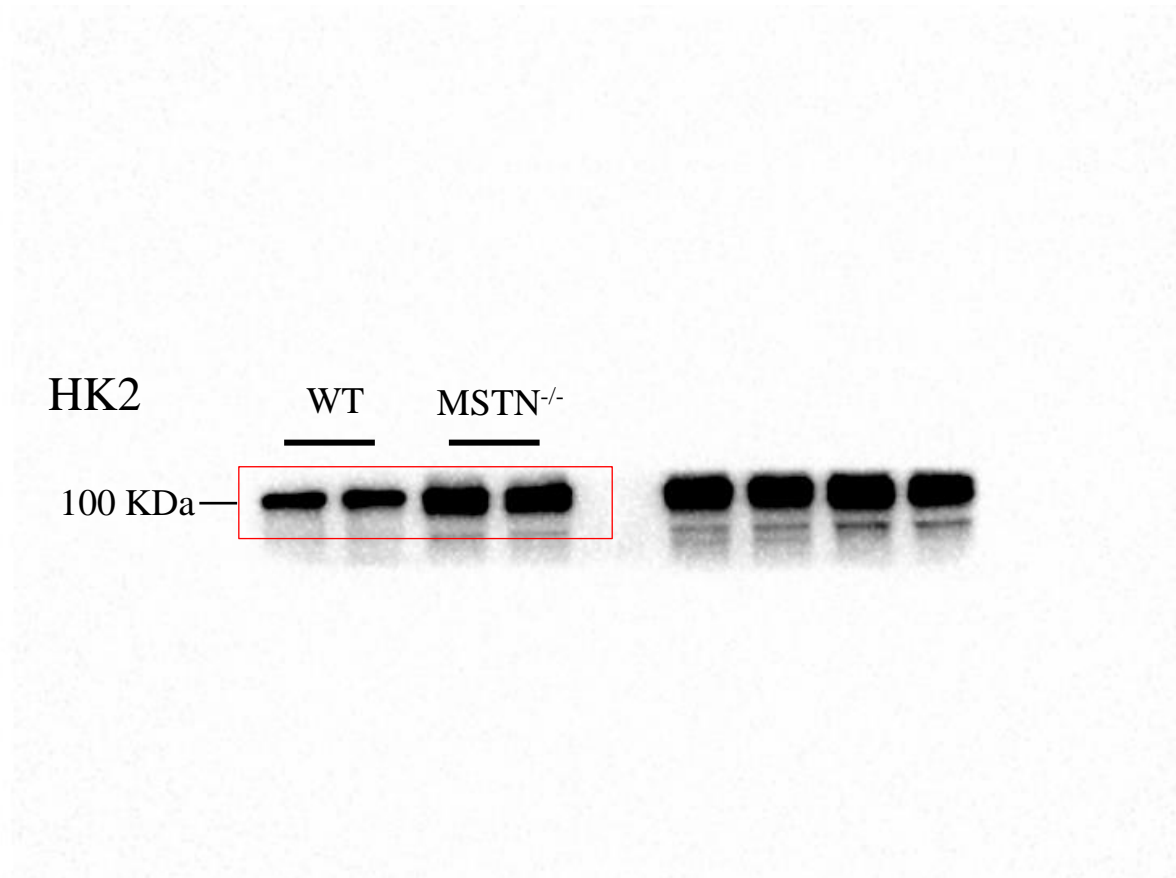

Figure 1D source data

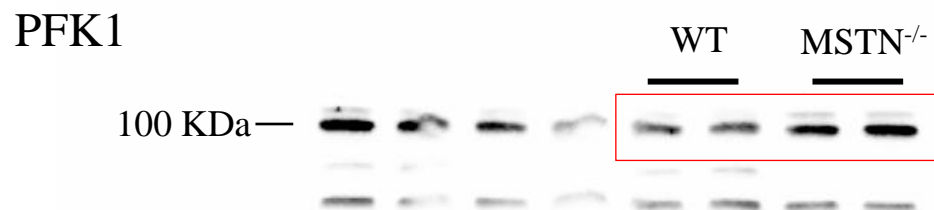

Figure 1D source data

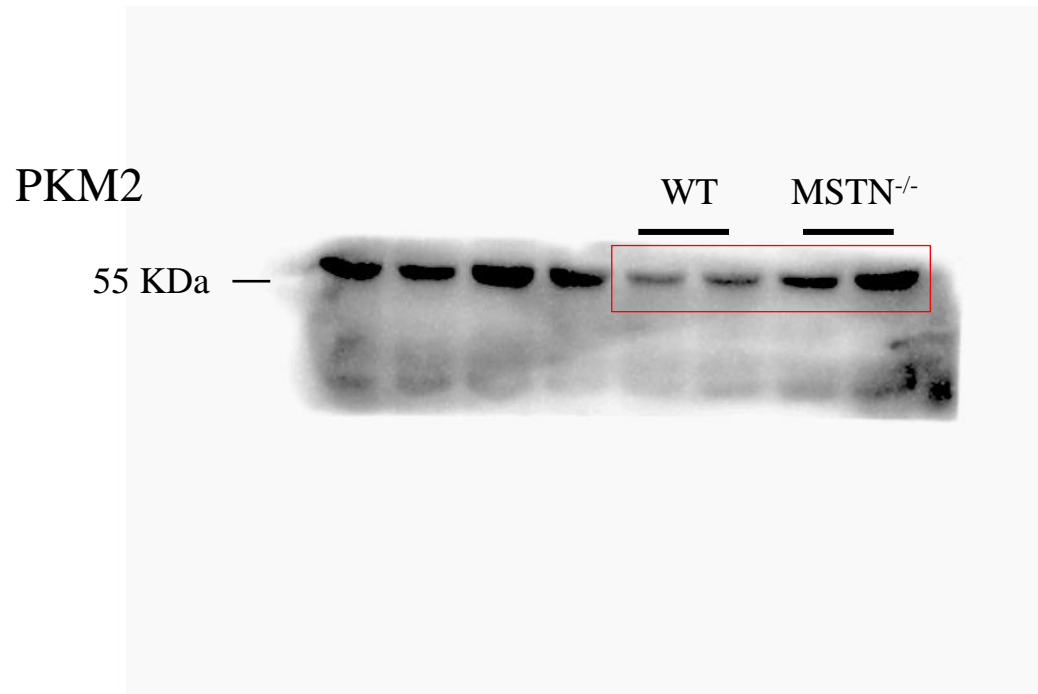

Figure 1D source data

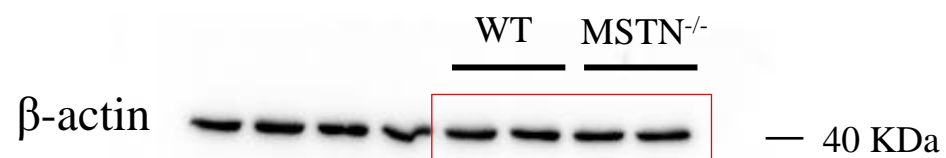

Supplement: fig1-data2 [file elife-81858-fig1-data2-v2.zip]
