# Supplementary material for: Fecal transplant from myostatin deletion pigs positively impacts the gut-muscle axis
Source: eLife journal article supplement (doi:10.7554/elife.81858), 2023-04-11
Supplement: fig1-figsupp1-data1 [file elife-81858-fig1-figsupp1-data1-v2.zip]

## Sheet: b
		ace
WT	ybc1	705.255
	ybc2	650.545
	ybc3	697.469
	ybc4	653.269
	ybc5	748.074
MSTN KO	ybm1	659.351
	ybm2	600.835
	ybm3	591.717
	ybm4	613.979
	ybm5	625.247

## Sheet: c
		chao1
WT	ybc1	687.649
	ybc2	633
	ybc3	713.57
	ybc4	680.719
	ybc5	745.344
MSTN KO	ybm1	648.936
	ybm2	658.122
	ybm3	577.182
	ybm4	589.902
	ybm5	638.346

## Sheet: d
		shannon
WT	ybc1	5.76752
	ybc2	6.36428
	ybc3	6.52178
	ybc4	5.12987
	ybc5	5.90993
MSTN KO	ybm1	6.54296
	ybm2	6.60485
	ybm3	6.04736
	ybm4	6.64139
	ybm5	6.38756

## Sheet: e
		simpson
WT	ybc1	0.942009
	ybc2	0.962895
	ybc3	0.964298
	ybc4	0.824373
	ybc5	0.937446
MSTN KO	ybm1	0.973277
	ybm2	0.974794
	ybm3	0.964864
	ybm4	0.977378
	ybm5	0.969707
