# Supplementary material for: Fecal transplant from myostatin deletion pigs positively impacts the gut-muscle axis
Source: eLife journal article supplement (doi:10.7554/elife.81858), 2023-04-11
Supplement: fig2-data1 [file fig.2a.xlsx]

## Sheet: fig2.a1
Small intestinal muscularis thickness (μm)
	WT	MSTN KO
	554.762	763.417
	413.537	702.938
	387.97	652.146
	411.527	538.832
	311.743	366.874
	589.791	609.91
	297.151	470.878
	296.093	512.964
	284.812
	301.676
	358.795
Average	384.906	577.245
test		0.00395151
SE	31.7482	45.9645

## Sheet: fig2.a2
Thickness of villus crest of small intestine (μm)
	WT	MSTN KO
	2011.8	2180.61
	1595.94	2349.81
	1512.56	1873.35
	816.69	1447.69
	1457.95	2048.96
	1396.5	3005.95
	1595.71	1787.44
	1387.64	1357.22
	1513.01
	1440.14
Average	1472.79	2006.38
test		0.0274829
SE	92.4258	186.53
