# Supplementary material for: Fecal transplant from myostatin deletion pigs positively impacts the gut-muscle axis
Source: eLife journal article supplement (doi:10.7554/elife.81858), 2023-04-11
Supplement: fig2-data1 [file fig.2b.xlsx]

## Sheet: fig2.b
	MSTN			a-SMA			calponin			actin
	1	31791	25791	1	25420.6		1	21460.9		1	30665.8
	2	30471.6	24471.6	2	24606.8		2	19040.6		2	28668
	3	6962.36		3	37430.1		3	31945.9		3	39247.1
	4	9966.02		4	47523.5		4	42213.6		4	36346.4
	1	30540.4	24540.4	1	25390.4		1	20133.6		1	15562.9
	2	28105.7	22105.7	2	24737.3		2	18346.4		2	14402.6
	3	6974.87	0	3	37358.2		3	30561.6		3	18309.1
	4	11679.9	0	4	37177.6		4	40025		4	16766.2
		0.841034		0.992572	0.828957		0.982587	0.699833		1.02614
		0.853621	0.847328	1.00743	0.858338	0.843647	1.01741	0.664177	0.682005	0.97386
		0		0	0.953705		1.13046	0.81397		1.1935
		0		0	1.30752		1.54984	1.16142		1.70296
		1.57685		1.0135	1.63148		0.974298	1.2937		1.00774
		1.53483	1.55584	0.986496	1.71755	1.67451	1.0257	1.27382	1.28376	0.992258
		0		0	2.04042		1.21851	1.6692		1.30025
		0		0	2.21741		1.32421	2.38724		1.85957
		WT	KO	Ttest
	MSTN	0.992572	0
		1.00743	0
		1.0135	0
		0.986496	0	4.18512e-12
	a-SMA	0.982587	1.13046
		1.01741	1.54984
		0.974298	1.21851
		1.0257	1.32421	0.0154914
	Calponin-1	1.02614	1.1935
		0.97386	1.70296
		1.00774	1.30025
		0.992258	1.85957	0.0180381
