# Supplementary material for: Fecal transplant from myostatin deletion pigs positively impacts the gut-muscle axis
Source: eLife journal article supplement (doi:10.7554/elife.81858), 2023-04-11
Supplement: fig2-data1 [file Fig2.c.xlsx]

## Sheet: fig2.c
	Sample	Ct (dR)			ΔΔCT	average	fold	test	SE	errorbar
ZO-1	2W1	29.42
		29.99	29.705	25.69	0.0618535
	3W1	29.17
		29.32	29.245	25.55	0.0772137
	2W2	26.11
		25.99	26.05	21.83	0.0536603
	3W2	27.11
		27.03	27.07	22.76	0.0504151
	2W3	26.51
		26.57	26.54	22.33	0.0540336
	3W3	27.39
		27.28	27.335	23.1	0.0531053	0.0583803	1		0.00407922	0.0698733
	2K1	29.08
		29.28	29.18	26.43	0.148651
	3K1	27.81
		27.92	27.865	24.49	0.0963882
	2K2	28.47
		28.39	28.43	25.95	0.179244
	3K2	26.64
		26.69	26.665	22.88	0.072544
	2K3	28.95
		28.87	28.91	26.59	0.200267
	3K3	27
		26.97	26.985	23.38	0.0821839	0.12988	2.22472	0.00940537	0.0219299	0.168848
Occludin	2W1	29.64
		29.36	29.5	25.69	0.0712977
	3W1	29.11
		29.76	29.435	25.55	0.0676859
	2W2	26.52
		26.39	26.455	21.83	0.0405262
	3W2	27.75
		27.82	27.785	22.76	0.0307131
	2W3	27.02
		26.6	26.81	22.33	0.0448111
	3W3	28.24
		28.56	28.4	23.1	0.0253829	0.0467362	1		0.00773979	0.165606
	2K1	29.05
		29.02	29.035	26.43	0.164368
	3K1	27.99
		28.13	28.06	24.49	0.0842021
	2K2	29.37
		29.18	29.275	25.95	0.0997873
	3K2	26.94
		26.9	26.92	22.88	0.0607909
	2K3	30.63
		29.99	30.31	26.59	0.0758872
	3K3	27.48
		27.59	27.535	23.38	0.0561333	0.0901948	1.92987	0.0359181	0.0161854	0.17945
Claudin-1	2W1	33.08
		32.86	32.97	25.69	0.0064343
	3W1	34.37
		33.87	34.12	25.55	0.00263132
	2W2	30.24
		30.22	30.23	21.83	0.00296038
	3W2	35.37
		33.99	34.68	22.76	0.000258061
	2W3	33.97
		34.35	34.16	22.33	0.000274672
	3W3	33.79
		33.37	33.58	23.1	0.000700173	0.00220982	1		0.000973319	0.440452
	2K1	33.47
		33.42	33.445	26.43	0.00773169
	3K1	32.16
		32.23	32.195	24.49	0.00479252
	2K2	31.75
		32.13	31.94	25.95	0.0157337
	3K2	32.9
		33.75	33.325	22.88	0.000717367
	2K3	35.43
		35.69	35.56	26.59	0.00199416
	3K3	31.52
		31.55	31.535	23.38	0.00350833	0.00574629	2.60035	0.176516	0.00222843	0.387802
