# Supplementary material for: Fecal transplant from myostatin deletion pigs positively impacts the gut-muscle axis
Source: eLife journal article supplement (doi:10.7554/elife.81858), 2023-04-11
Supplement: fig2-data1 [file fig2.d.xlsx]

## Sheet: fig2.d
	MLCK				p-MLC			MLC
	1	31690			1	35279.3		1	37373.5
	2	30233.7			2	37170.7		2	40885.2
	3	18794.5			3	24563.3		3	37989.7
	4	21716.7			4	14927.8		4	22250
												Actin
	1	19588.1	25639		1	37843.4	36561.4	1	34636.1	36004.8		23114.3
	2	17609.2	23921.4		2	39661.8	38416.2	2	36907.7	38896.4		21535.3
	3	11577.5	15186		3	30791.6	27677.5	3	34121.8	36055.8		28778.1
	4	14566.3	18141.5		4	21306.4	18117.1	4	21628.7	21939.4		26556.3
WT	1.37101		1.23513			WT	0.979851		0.978329
	1.40391		1.26477				0.955631		0.954147
	0.847444		0.763454				1.05107		1.04943
	0.817691	1.11001	0.736649	1			1.01968	1.00156	1.01809	1
MSTN KO	0.653083		0.588355			MSTN KO	0.68126		0.680201
	0.817759		0.736711				0.680411		0.679354
	0.402303		0.36243				0.854		0.852673
	0.548506		0.494143	0.54541			0.971151		0.969642	0.795468
Ttest				0.0328001		Ttest				0.0326908
