# Supplementary material for: Fecal transplant from myostatin deletion pigs positively impacts the gut-muscle axis
Source: eLife journal article supplement (doi:10.7554/elife.81858), 2023-04-11
Supplement: fig2-data1 [file fig2.e.xlsx]

## Sheet: fig2.e
IPEC-J2	p-MLC			MLC				MLCK
	1	22571.8		1	25176.1			1	21581.1		1	19856.4
	2	24615.7		2	27566.6			2	26340.1		2	18991.2
	3	23709.2		3	21169			3	18515.1		3	20822.5
	4	17659.5		4	22445.4			4	19083.7		4	22888.2
	5	19894.7		5	22457.8			5	16131.1		5	22482.5
	6	15081.1		6	27769.8			6	15688.2		6	24803.4
	1	23450.3		1	26891.6	26033.8		1	21975.6
	2	19842.1		2	28909.4	28238		2	26220.1
	3	18578.7		3	22949	22059		3	18618.4
	4	16060.1		4	22449.6	22447.5		4	19799.8
	5	15289.8		5	22267.1	22362.5		5	16791.7
	6	14071.1		6	28743.8	28256.8		6	16291.6
				p-MLC/MLC							MLCK
	Control	0.867017		0.98914				Control	1.08686		0.966877
		0.871722		0.994507					1.38696		1.23386
		1.07481		1.2262					0.889188		0.79103
		0.900762		1.02764					1.10672		0.984553
		0.702675		0.80165					1.38065		1.22824
		0.842229	0.876536	0.96086	1				0.894148	1.12409	0.795443	1
	SB431542	0.786703		0.897514				SB431542	0.833778		0.741737
		0.889648		1.01496					0.717493		0.638289
		0.533716		0.608892					0.632501		0.562679
		0.715452		0.816227					0.865066		0.769571
		0.683727		0.780033					0.746876		0.664428
		0.497972		0.568113	0.780956				0.656828		0.584321	0.660171
	Ttest				0.0335559			Ttest				0.00297037
