# Supplementary material for: Fecal transplant from myostatin deletion pigs positively impacts the gut-muscle axis
Source: eLife journal article supplement (doi:10.7554/elife.81858), 2023-04-11
Supplement: fig2-data1 [file fig2.f.xlsx]

## Sheet: fig2.f
	Sample	Ct (dR)			ΔΔCT	average	fold	test	SE	errorbar
ZO-1	C1	21.16
		21.46	21.31	17.67	0.0802141
	C2	21.36
		21.31	21.335	17.26	0.0593339
	C3	21.91
		22.3	22.105	17.81	0.050942	0.0634967			0.00870269	0.137057
	S1	21.78
		21.98	21.88	18.4	0.0896222
	S2	21.22
		21.52	21.37	18.415	0.12896
	S3	21.68
		21.76	21.72	18.97	0.148651	0.122411	1.92784	0.0385926	0.0173519	0.141751
Occludin	C1	21.96
		22.21	22.085	17.67	0.0468762
	C2	22.1
		21.89	21.995	17.26	0.0375511
	C3	23.13
		22.56	22.845	17.81	0.030501	0.0383094			0.0047423	0.123789
	S1	22.51
		21.94	22.225	17.9	0.0498936
	S2	21.94
		22.2	22.07	18.415	0.0793844
	S3	22.33
		22.84	22.585	18.97	0.0816162	0.0702981	1.83501	0.0469319	0.0102226	0.145417
Claudin-1	C1	18.1
		17.62	17.86	17.67	0.876606
	C2	17.59
		17.74	17.665	17.26	0.755236
	C3	18
		17.98	17.99	17.81	0.882703	0.838182			0.04151	0.0495239
	S1	18.77
		19.34	19.055	17.9	0.449066
	S2	20.99
		20.98	20.985	18.415	0.168404
	S3	19.08
		19.02	19.05	18.97	0.946058	0.521176	0.621794	0.242098	0.227366	0.436256
Control	ZO-1	0.0802141		1.26327
		0.0593339		0.934436
		0.050942	0.0634967	0.802274	0.999995
SB431542		0.0896222		1.41144
		0.12896		2.03097
		0.148651		2.34107	1.92783
Control	Occludin	0.0468762		1.22363
		0.0375511		0.980217
		0.030501	0.0383094	0.796183	1.00001
SB431542		0.0498936		1.3024
		0.0793844		2.07221
		0.0816162		2.13047	1.83503
Control	Claudin-1	0.876606		1.04584
		0.755236		0.901041
		0.882703	0.838182	1.05312	1
SB431542		0.449066		0.535762
		0.168404		0.200916
		0.946058		1.1287	0.621793
