# Supplementary material for: Fecal transplant from myostatin deletion pigs positively impacts the gut-muscle axis
Source: eLife journal article supplement (doi:10.7554/elife.81858), 2023-04-11
Supplement: fig3-data1 [file fig3.b.xlsx]

## Sheet: fig3.b
		Gastrocnemius	SOL	EDL
WT-M	2091	305.4	16.8	18.66
	160	292.8	19.1	19.7
	2086	275.4	18.6	20.6
	2095	315.6	21.6	23.3
	2089	266.4	19.1	24.2
	2083	275.1	18.7	19.1
	2098	283.8	18	18.9
	2099	287.4	21.4	23
KO-M	2081	308.4	22.2	21.3
	158	316.8	19.5	24.4
	2094	293.7	20.9	22.3
	2085	322.2	23.3	22.4
	2097	314.1	19.6	24.5
	2087	294	18.8	21.3
	2093	309.9	18.7	19.7
	2082	287.1	18.8	20.5
Average	WT-M	287.737	19.1625	20.9325
	KO-M	305.775	20.225	22.05
Ttest		0.0275909	0.226676	0.280935
SE	WT-M	5.81982	0.573503	0.788751
SE	KO-M	4.46765	0.614047	0.608863
