# Supplementary material for: Fecal transplant from myostatin deletion pigs positively impacts the gut-muscle axis
Source: eLife journal article supplement (doi:10.7554/elife.81858), 2023-04-11
Supplement: fig3-data1 [file fig3.d.xlsx]

## Sheet: fig3.d
	WT-M1	WT-M2	WT-M3	WT-M4	WT-M5			KO-M1	KO-M2	KO-M3	KO-M4	KO-M
	453.559	477.736	606.979	323.339	488.875			306.574	494.198	450.207	623.625	794.125
	456.259	515.236	662.871	340.838	511.5			645.088	676.949	495.724	727.5	843.875
	495.997	560.964	713.801	369.567	550.5			764.549	721.335	508.69	819.875	877.25
	517.073	591.912	723.203	398.297	601.875			796.26	749.851	515.31	857.375	1003.88
	521.798	613.845	726.86	408.222	711.25			801.268	772.664	540.69	949.5	1023.62
	555.073	627.418	743.053	434.34	746.125			855.339	776.632	548.69	977.875	1044.25
	562.307	633.375	754.806	440.608	771.625			866.657	788.534	595.862	1113.5	1086.25
	584.218	633.676	773.088	446.093	808.25			879.231	806.388	602.207	1138.75	1093.25
	590.037	634.878	775.439	446.876	907.625			884.287	811.347	621.517	1203.75	1219.12
	606.526	642.99	801.557	448.705	923.375			926.01	853.005	645.241	1212.75	1223.62
	623.794	647.45	803.385	459.413	962.875			964.237	857.469	675.31	1233.75	1231.25
	644.772	662.942	813.832	460.196	999.25			966.752	861.932	694.621	1284.62	1326.38
	652.488	669.431	837.338	481.091	1047			974.14	864.164	696.552	1289	1335.88
	690.587	691.064	890.357	485.008	1155.25			989.89	892.928	696.828	1301.88	1382.38
	696.413	698.275	890.88	485.531	1273.62			1008.5	896.647	704.828	1304.5	1424.88
	706.019	712.097	910.468	493.105	1342			1030.63	903.343	715.31	1345.62	1432.38
	708.671	713.899	912.819	499.373	1403.62			1051	913.757	720.276	1347	1478.5
	713.648	724.416	919.609	501.201	1414			1055.53	917.229	726.069	1381.5	1482.25
	716.869	732.829	928.751	503.03	1418			1087.47	924.668	734.621	1389.12	1536
	717.647	733.429	930.579	504.858	1423			1095.27	928.635	737.931	1394.38	1550.25
	730.758	737.335	938.414	520.529	1449.5			1106.33	932.603	740.966	1417.88	1570.62
	731.578	748.453	950.69	544.035	1476.62			1107.84	935.826	743.172	1442.5	1581.75
	741.172	750.556	959.047	558.661	1492.62			1109.1	945.249	746.207	1559	1586.35
	762.993	751.157	959.047	559.444	1493.62			1113.12	964.094	748.414	1574.6	1594
	766.059	759.098	960.353	568.063	1500.62			1113.37	972.277	753.103	1583.25	1612.25
	771.846	759.269	961.92	569.63	1509.62			1124.69	995.338	769.379	1608.25	1672.38
	784.144	764.377	963.226	593.397	1549.75			1136.51	999.554	774.897	1617.12	1692.5
	794.271	768.447	976.807	598.882	1564.7			1148.58	1009.97	779.034	1756	1693.5
	795.235	784.508	981.509	602.016	1575.25			1152.11	1032.29	779.31	1807.75	1748.62
	797.888	785.71	983.598	603.583	1607.25			1166.19	1034.27	790.069	1838.62	1785.38
	808.497	786.611	986.732	614.031	1629.25			1186.06	1066.01	794.483	1841.62	1835.38
	817.419	803.704	990.127	616.642	1650.5			1186.31	1078.41	795.862	1865	1853.25
	818.142	822.967	1029.3	618.732	1678.5			1207.18	1083.37	796.138	1906.62	1878.38
	831.887	832.282	1036.09	625.522	1692.75			1208.69	1084.61	802.759	1915	1878.5
	835.503	834.986	1040.53	626.567	1717.88			1227.55	1097.5	818.483	1990	1880.38
	838.397	836.188	1043.15	626.828	1730			1230.07	1097.75	819.862	2010.38	1929.38
	838.638	843.399	1046.28	634.141	1734.38			1232.38	1106.92	839.448	2087.62	2005.12
	839.615	845.803	1048.89	638.842	1756.25			1240.05	1119.82	841.931	2170	2084.88
	847.92	850.309	1055.42	659.476	1770.75			1243.4	1127.01	847.172	2238.38	2363
	864.921	855.417	1069.26	665.483	1778.25			1243.65	1134.45	859.31	2278.12	2486.75
	871.672	859.795	1074.75	670.184	1780.75			1264.78	1142.88	863.172	2311.75	2750.38
	888.792	862.328	1077.36	674.624	1784.88			1275.09	1156.76	864.552	2362.25	2754.75
	888.792	865.032	1080.5	686.377	1811			1282.63	1163.46	865.655	2584.25
	897.473	867.736	1092.77	696.041	1817.62			1293.19	1165.69	892.69	2620.5
	897.714	874.346	1096.95	708.316	1824			1300.99	1175.11	898.759
	898.438	874.346	1129.07	711.189	1828.62			1302	1179.58	902.897
	906.154	877.69	1129.34	719.808	1833.5			1318.34	1200.41	904
	918.469	886.966	1130.38	724.509	1837.62			1326.64	1201.65	908.138
	935.812	900.661	1131.16	734.956	1862.12			1333.69	1218.26	911.724
	938.802	905.595	1133.78	735.478	2015.5			1338.3	1231.4	917.517
	939.429	906.196	1144.22	749.843	2022.5			1342.99	1244.05	917.793
	943.769	915.886	1150.49	770.738	2027.5			1354.06	1248.26	923.862
	947.145	917.012	1159.11	772.827	2082.5			1356.32	1274.3	926.345
	968.605	917.488	1162.77	784.058	2104.12			1400.84	1275.79	929.103
	971.019	922.12	1166.68	805.213	2145			1411.4	1295.63	934.621
	972.704	929.508	1167.47	816.966	2225.88			1413.66	1299.59	935.724
	984.037	929.932	1186.79	832.898	2335.88			1413.91	1316.7	941.517
	993.687	933.838	1188.88	836.555	2388.75			1422.72	1328.85	941.517
	994.165	934.583	1188.88	870.508	2406.88			1426.69	1371.5	945.379
	1002.36	935.641	1192.8	874.164	2547.12			1440.94	1372.74	950.069
	1005.5	944.354	1198.03	874.687	2947.25			1442.08	1373.24	957.793
	1006.46	951.265	1208.21	877.037				1456.92	1377.21	962.759
	1006.94	952.211	1221.01	903.416				1458.11	1385.39	964.138
	1015.62	956.373	1225.45	907.073				1471.25	1393.08	966.621
	1020.69	957.875	1233.55	929.012				1481.06	1394.56	990.069
	1031.54	960.759	1234.33	940.242				1484.33	1405.97	992.828
	1035.4	962.983	1244.25	946.511				1499.01	1427.54	998.897
	1040.94	964.765	1249.22	953.04				1503.76	1430.27	1001.93
	1046.01	965.387	1265.15	956.697				1504.45	1430.77	1003.03
	1048.42	968.391	1272.98	962.704				1506.97	1463.25	1018.76
	1049.14	969.84	1291.01	969.494				1519.1	1464.99	1019.03
	1050.59	970.374	1303.54	970.539				1524.57	1482.59	1020.69
	1068.19	971.696	1312.68	980.986				1534.81	1502.18	1021.24
	1073.74	974.915	1313.21	1024.08				1564.56	1504.41	1026.76
	1082.9	976.25	1358.39	1037.66				1577.64	1532.43	1035.59
	1087.48	977.586	1359.69	1040.53				1595.24	1555.74	1039.45
	1097.61	980.41	1385.29	1052.55				1610.42	1557.48	1044.97
	1105.44	980.791	1397.3	1058.3				1615.53	1563.18	1050.48
	1106.92	984.53	1411.67	1066.39				1677.98	1563.93	1056.55
	1113.28	987.921	1422.64	1071.88				1680.5	1576.32	1059.86
	1123.17	994.832	1423.94	1076.58				1705.15	1576.32	1069.79
	1140.4	1003.24	1431	1098.52				1733.06	1579.05	1074.48
	1140.77	1005.65	1434.39	1100.87				1738.59	1596.41	1075.86
	1149.93	1008.05	1440.4	1105.57				1747.75	1630.38	1081.66
	1152.1	1019.17	1441.97	1111.84				1759.72	1641.04	1084.14
	1160.24	1022.78	1446.41	1114.45				1782.09	1656.42	1091.59
	1160.3	1036.08	1446.67	1147.88				1803.27	1658.9	1097.93
	1164.2	1049.22	1446.93	1164.07				1817.88	1659.89	1120.83
	1166.33	1052.11	1467.3	1176.87				1822.27	1673.78	1121.1
	1177.66	1053.72	1471.22	1180				1823	1674.27	1129.93
	1178.63	1054.02	1474.87	1199.59				1826.37	1690.88	1132.69
	1182.97	1079.56	1528.94	1202.47				1861.07	1692.87	1140.69
	1189.72	1080.46	1539.39	1238.25				1871.64	1698.32	1142.07
	1190.68	1086.56	1545.13	1239.55				1898.97	1699.81	1146.48
	1195.26	1087.68	1583.52	1256.79				1900.31	1702.79	1151.45
	1200.9	1094.29	1585.09	1271.68				1923.44	1725.6	1153.38
	1201.53	1095.79	1607.29	1276.9				1923.81	1731.8	1170.76
	1203.22	1096.09	1640.46	1282.12				1944.82	1763.04	1174.34
	1208.34	1096.69	1650.65	1287.35				1944.99	1783.38	1176.83
	1208.77	1102.59	1658.48	1287.87				1967.71	1792.06	1184.28
	1214.55	1109.01	1668.67	1292.05				2024.25	1814.12	1187.59
	1225.16	1114.34	1670.5	1293.88				2026.56	1822.56	1196.69
	1229.75	1116.52	1676.5	1299.1				2028.32	1830.99	1196.97
	1233.6	1119.68	1688.52	1320.26				2033.6	1833.71	1200
	1245.54	1122.83	1693.48	1321.56				2037.62	1853.3	1200.83
	1248.31	1135.44	1703.41	1328.09				2052.97	1853.8	1214.62
	1250.72	1136.78	1710.2	1346.9				2093.2	1853.8	1216
	1273.39	1152.8	1719.86	1389.99				2098.4	1855.04	1224
	1285.2	1156.01	1729.26	1404.88				2103.88	1857.02	1226.76
	1296.06	1156.01	1741.02	1404.88				2129.42	1865.21	1234.48
	1316.55	1160.69	1750.16	1405.14				2141.24	1872.89	1242.21
	1325.71	1164.02	1751.46	1405.66				2166.7	1875.62	1245.24
	1343.98	1166.16	1751.98	1411.93				2194.05	1877.6	1246.07
	1344.52	1167.9	1773.4	1414.02				2212.16	1880.83	1251.59
	1348.38	1168.3	1789.59	1415.33				2218.7	1889.01	1252.14
	1352.72	1174.17	1793.51	1435.7				2237.56	1898.68	1263.72
	1358.11	1178.41	1796.91	1438.57				2278.84	1905.62	1264.55
	1370.56	1186.73	1797.95	1455.29				2289.62	1948.77	1297.38
	1377.95	1188.06	1798.21	1485.32				2311.5	1949.27	1303.45
	1379.44	1190.2	1800.56	1487.15				2326.09	1955.71	1304.55
	1383.1	1193.4	1804.22	1494.72				2326.69	1961.17	1316.14
	1383.58	1195.81	1806.05	1494.99				2332.53	1975.3	1320.83
	1384.07	1201.15	1815.71	1496.81				2356.77	2010.76	1332.14
	1393.71	1203.05	1816.5	1498.12				2373.37	2019.69	1342.07
	1394.32	1205.76	1817.28	1513.01				2392.74	2039.03	1348.41
	1405.23	1208.63	1848.1	1514.31				2405.06	2069.03	1356.97
	1408.45	1210.26	1848.62	1554.27				2432.98	2122.84	1363.31
	1412.52	1223.85	1859.59	1557.15				2447.31	2133.01	1369.1
	1418.55	1225.29	1871.87	1559.5				2466.43	2156.81	1376.83
	1426.5	1230.53	1872.91	1563.94				2467.93	2182.35	1378.76
	1431.57	1247.89	1873.43	1565.5				2472.46	2214.84	1407.72
	1441.94	1254.57	1876.04	1572.03				2476.23	2216.08	1408.55
	1448.69	1254.57	1878.4	1577				2496.35	2221.04	1408.83
	1455.81	1256.71	1879.7	1577				2505.16	2227.73	1418.21
	1461.12	1280.48	1879.96	1607.29				2507.42	2227.98	1426.76
	1480.86	1289.59	1879.96	1611.47				2510.94	2232.44	1430.9
	1484.58	1296.5	1884.4	1619.05				2512.45	2240.63	1445.24
	1487.06	1303.98	1890.15	1644.38				2519.49	2268.15	1449.1
	1488.95	1309.72	1893.8	1668.41				2525.28	2283.53	1480.55
	1490.96	1324.14	1895.63	1729.26				2527.04	2291.21	1492.14
	1493.06	1326.84	1918.62	1730.31				2552.78	2296.42	1498.48
	1493.5	1345.47	1932.72	1737.62				2566.52	2329.65	1512.55
	1497.22	1354.73	1938.99	1738.4				2569.04	2336.09	1512.83
	1499.81	1357.4	1939.77	1739.71				2581.86	2344.03	1513.38
	1512.35	1371.61	1948.39	1748.33				2584.63	2364.61	1520
	1516.81	1373.7	1961.45	1757.99				2593.43	2429.08	1524.97
	1520.54	1380.93	1962.23	1763.22				2595.19	2431.07	1536.83
	1543.76	1398.35	1965.11	1767.92				2604.75	2435.28	1562.21
	1548.27	1404.41	1967.46	1809.18				2616.07	2456.61	1564.69
	1549.24	1411.87	1977.64	1821.98				2621.1	2457.6	1575.45
	1569.13	1420.29	1987.31	1826.16				2638.45	2482.64	1579.86
	1571.88	1423.29	1988.61	1829.29				2680.45	2487.11	1592.55
	1594.67	1433.21	1996.45	1841.57				2684.72	2496.78	1592.83
	1630.26	1433.53	2009.25	1853.32				2699.06	2503.97	1595.86
	1630.98	1434.86	2016.04	1883.62				2717.67	2529.26	1597.79
	1643.9	1436.73	2021.78	1884.14				2721.69	2559.02	1605.79
	1644.51	1444.48	2024.66	1891.72				2737.29	2621.01	1654.07
	1647.06	1446.73	2032.23	1907.65				2761.18	2674.07	1667.31
	1650.22	1447.33	2045.29	1910.26				2800.16	2681.02	1678.62
	1651.46	1447.68	2058.87	1911.56				2864.04	2687.71	1739.31
	1680.17	1448.53	2072.45	1913.92				2899.5	2697.13	1753.93
	1684.36	1462.64	2100.4	1917.31				2939.74	2710.52	1764.14
	1693.26	1464.24	2106.14	1953.35				2949.55	2740.28	1766.9
	1695.27	1487.21	2112.15	1976.34				2952.82	2741.27	1767.45
	1710.47	1492.55	2121.55	1991.49				2968.16	2749.7	1770.21
	1716.79	1493.36	2128.6	1999.06				3036.32	2751.44	1777.66
	1717.07	1500.3	2142.19	2049.47				3107.74	2778.47	1796.41
	1719.96	1509.83	2165.95	2072.19				3129.12	2830.29	1797.79
	1722.37	1521.13	2171.18	2092.82				3149.24	2832.77	1813.79
	1734.18	1526.21	2182.15	2094.91				3329.06	2833.52	1829.52
	1734.28	1529.05	2228.11	2097.79				3575.52	2979.82	1846.34
	1767.22	1559.06	2260.5	2125.47				3594.39	2989.73	1853.52
	1800.73	1574.42	2276.69	2129.13				3851.16	3079	1867.86
	1835.7	1577.23	2280.35	2139.57				5466.78	3122.4	1891.31
	1847.6	1578.83	2351.39	2188.94					3896.55	1894.34
	1861.49	1586.31	2356.35	2189.2						1904.83
	1862.55	1591.92	2401.27	2195.73						1923.03
	1865.35	1598.16	2452.47	2202.52						1928.55
	1872.35	1609.28	2468.4	2214.01						1945.93
	1901.29	1627.17	2510.97	2250.57						2002.76
	1916.23	1668.04	2523.24	2255.28						2036.97
	1931.71	1681.69	2525.33	2258.93						2049.1
	1942.04	1701.43	2561.38	2275.39						2083.31
	1961.42	1724.66	2573.39	2290.01						2102.34
	2006.05	1735.77	2591.93	2290.01						2166.34
	2008.03	1745.5	2597.94	2305.94						2179.31
	2033	1746.57	2612.05	2308.56						2185.66
	2035.56	1760.99	2679.17	2311.17						2207.72
	2040.17	1771.41	2682.3	2313						2213.52
	2041.89	1779.15	2820.99	2316.91						2243.31
	2050.22	1796.25	3214.85	2341.73						2276.69
	2068.14	1802.12		2350.08						2315.03
	2069.03	1806.13		2351.39						2336.83
	2090.11	1822.16		2355.57						2340.14
	2104.73	1843.26		2360.79						2349.52
	2147.49	1844.86		2449.85						2370.48
	2177.04	1859.82		2462.39						2381.52
	2183.4	1890		2466.57						2435.59
	2184.22	1910.57		2473.88						2465.1
	2215.78	1923		2476.49						2465.1
	2217.79	1949.3		2496.6						2503.72
	2253.66	1966.39		2734.8						2527.72
	2258.82	1969.33		2759.09						2555.86
	2310.19	1982.42		2945.31						2566.62
	2336.01	2105.55		3027.06						2584.28
	2340.89	2130.66		3205.44						2600
	2349.24	2148.02		3274.13						2675.31
	2354.2	2161.91		3379.39						2756.69
	2364.42	2166.18		3731.72						2864
	2404.59	2174.46								3039.72
	2424.96	2175.53								3132.69
	2435.29	2186.75								3134.9
	2461.98	2224.68								3179.31
	2464.28	2225.48								3196.97
	2472.6	2226.81								3246.34
	2501	2258.6								3326.07
	2514.49	2259.93								3537.93
	2552.37	2268.48								3662.07
	2569.01	2289.31
	2573.03	2297.86
	2614.06	2357.42
	2674.03	2366.77
	2904.16	2375.59
	3175.04	2392.41
	3223.53	2409.51
	4196.27	2460.79
		2488.84
		2594.61
		2606.63
		2607.96
		2623.46
		2629.33
		2685.16
average	1421.52	1312.11	1576.01	1394.17	1564.7			1885.94	1708.72	1417.2	1574.6	1586.35
WT-M total	226	233	191	209	61						KO-M total	174	175	218	44	42
WT-M	0-500	500-1000	1000-1500	1500-2000	2000-2500	2500-3000	3000-3500	3500-4000		KO-M	0-500	500-1000	1000-1500	1500-2000	2000-2500	2500-3000	3000-3500	3500-4000
	3	56	85	40	31	8	2	1			1	13	53	33	33	32	5	4
	1	80	85	38	23	6	0	0			1	26	45	50	31	19	2	1
	0	92	59	62	26	11	1	0			2	65	74	38	21	9	7	2
	17	56	51	42	35	3	4	1			0	6	16	13	7	2	0	0
	1	11	12	25	10	2	2	0			0	3	15	18	4	2	0	0
	1.32743	24.7788	37.6106	17.6991	13.7168	3.53982	0.884956	0.442478			0.574713	7.47126	30.4598	18.9655	18.9655	18.3908	2.87356	2.29885
	0.429185	34.3348	36.4807	16.309	9.87124	2.57511	0	0			0.571429	14.8571	25.7143	28.5714	17.7143	10.8571	1.14286	0.571429
	0	48.1675	30.8901	32.4607	13.6126	5.75916	0.52356	0			0.917431	29.8165	33.945	17.4312	9.63303	4.12844	3.21101	0.917431
	8.13397	26.7943	24.4019	20.0957		1.43541	1.91388	0.478469			0	13.6364	36.3636	29.5455	15.9091	4.54545	0	0
	1.63934	18.0328	19.6721	40.9836	16.3934	3.27869		0			0	7.14286	35.7143	42.8571		4.7619	0	0
WT-M	2.30599	30.4216	29.8111	25.5096	13.3985	3.31764	0.830598	0.184189		KO-M	0.412714	14.5848	32.4394	27.4741	15.5555	8.53675	1.44549	0.757542
SE	1.48673	5.14156	3.45353	4.81003	1.19884	0.710847	0.361535	0.112936		SE	0.179839	4.11682	1.96898	4.55735	1.85273	2.75771	0.686546	0.423295
percent fibers
	500	1000	1500	2000	2500	3000	3500	4000
WT-M	2.30599	30.4216	29.8111	25.5096	13.3985	3.31764	0.830598	0.184189
KO-M	0.412714	14.5848	32.4394	27.4741	15.5555	8.53675	1.44549	0.757542
	1.48673	5.14156	3.45353	4.81003	1.23542	0.710847	0.581168	0.112936
	0.179839	4.11682	1.96898	4.55735	2.00741	2.75771	0.686546	0.423295
CAS						average	ttest	SE
WT-M	1421.52	1312.11	1576.01	1394.17	1564.7	1453.7		50.9449
KO-M	1885.94	1708.72	1417.2	1574.6	1586.35	1634.56	0.0388472	78.0564
