# Supplementary material for: Fecal transplant from myostatin deletion pigs positively impacts the gut-muscle axis
Source: eLife journal article supplement (doi:10.7554/elife.81858), 2023-04-11
Supplement: fig3-data1 [file fig3.e.xlsx]

## Sheet: fig3.e
	WT1	WT2	WT3			WT1	WT2	WT3			WT1	WT2	WT3					MSTN1	MSTN2	MSTN3		MSTN1	MSTN2	MSTN3		MSTN1	MSTN2	MSTN3
	I	I	I			IIa	IIa	IIa			IIb	IIb	IIb					I	I	I		Iia	Iia	Iia		IIb	IIb	IIb
Average	1484.6	1314.64	1162.32			1064.9	937.732	1056.67			1988.73	2023.05	1921.1				Average	1473.4	1602.97	1396.94		1209.96	1051.23	984.691		2578.06	2196.2	2236.22
SE	76.7257	43.0774	59.3997			30.0561	24.8472	31.5788			81.5521	58.3316	40.8783				SE	115.464	58.7437	97.0145		29.1523	32.028	25.0305		65.2225	60.7952	78.748
	2183.4	1923	928.751			1872.35	944.354	950.69			3223.53	2685.16	3214.85					2129.42	1877.6	1418.21		1705.15	928.635	926.345		5466.78	2232.44	1764.14
	2068.14	1598.16	1188.88			1767.22	850.309	1265.15			3175.04	2629.33	2165.95					2033.6	1889.01	957.793		1677.98	1274.3	779.31		3851.16	2833.52	1597.79
	1916.23	1448.53	1130.38			1722.37	1008.05	1150.49			2904.16	2623.46	2182.15					1871.64	1731.8	1867.86		1577.64	1248.26	1084.14		3594.39	2749.7	1097.93
	1865.35	1411.87	1221.01			1680.17	1122.83	1055.42			2674.03	2607.96	2573.39					1861.07	1504.41	1320.83		1564.56	857.469	748.414		3575.52	1702.79	1003.03
	1734.18	1735.77	1385.29			1630.98	733.429	890.88			2614.06	2606.63	1890.15					1759.72	1405.97	1605.79		1504.45	1427.54	917.517		3329.06	1557.48	1853.52
	1719.96	1079.56	1313.21			1630.26	1205.76	912.819			2573.03	2594.61	2612.05					1738.59	1596.41	1923.03		1456.92	1179.58	746.207		3149.24	1576.32	1928.55
	1549.24	1005.65	1411.67			1548.27	1160.69	1048.89			2569.01	2460.79	2452.47					1680.5	1699.81	1056.55		1442.08	776.632	904		3129.12	2039.03	1753.93
	1493.06	1371.61	1131.16			1520.54	1054.02	1162.77			2552.37	2409.51	1159.11					1524.57	1814.12	1595.86		1422.72	864.164	1224		3107.74	2487.11	1449.1
	1441.94	1109.01	803.385			1512.35	1096.09	1043.15			2514.49	2392.41	1879.96					1506.97	1555.74	1348.41		1413.66	1394.56	734.621		3036.32	2296.42	1654.07
	1426.5	1203.05	1312.68			1499.81	965.387	1249.22			2501	2375.59	2112.15					1484.33	1385.39	1142.07		1411.4	1200.41	769.379		2968.16	2740.28	1592.83
	1418.55	1380.93	959.047			1448.69	1022.78	1129.34			2472.6	2366.77	1939.77					1481.06	1875.62	1129.93		1400.84	903.343	998.897		2952.82	2268.15	1579.86
	1383.1	1398.35				1431.57	691.064	773.088			2464.28	2357.42	2171.18					1471.25	1783.38			1356.32	1165.69	1050.48		2949.55	2687.71	1592.55
	1370.56	1096.69				1412.52	712.097	1074.75			2461.98	2297.86	1751.98					1342.99	1563.18			1354.06	896.647	779.034		2939.74	1872.89	1524.97
	1352.72	1345.47				1393.71	867.736	1446.93			2435.29	2289.31	2351.39					1243.65	1463.25			1333.69	1032.29	1001.93		2899.5	1880.83	1813.79
	1296.06	1019.17				1384.07	956.373	890.357			2424.96	2268.48	1806.05					966.752	1502.18			1326.64	1078.41	1153.38		2864.04	2216.08	2213.52
	1233.6	1574.42				1383.58	906.196	662.871			2404.59	2259.93	1996.45					645.088	999.554			1318.34	1066.01	990.069		2800.16	1316.7	2049.1
	1190.68	1167.9				1348.38	971.696	976.807			2364.42	2258.6	2597.94					306.574				1302	964.094	964.138		2761.18	1430.27	2864
	1189.72	1326.84				1344.52	832.282	1434.39			2340.89	2226.81	2679.17									1300.99	917.229	962.759		2737.29	1948.77	2207.72
	1020.69	1447.33				1325.71	935.641	1208.21			2336.01	2225.48	2820.99									1293.19	995.338	917.793		2721.69	1961.17	2276.69
	838.397	1446.73				1316.55	836.188	1077.36			2310.19	2224.68	1607.29									1282.63	788.534	865.655		2717.67	2429.08	1829.52
		1509.83				1285.2	1080.46	981.509			2258.82	2186.75	1793.51									1275.09	721.335	992.828		2699.06	2621.01	2179.31
		1681.69				1273.39	748.453	983.598			2253.66	2175.53	1670.5									1264.78	676.949	774.897		2684.72	2457.6	2503.72
		1423.29				1250.72	642.99	1036.09			2217.79	2174.46	1948.39									1243.4	494.198	841.931		2680.45	2291.21	2465.1
		1529.05				1248.31	933.838	754.806			2215.78	2166.18	2106.14									1230.07	1163.46	1021.24		2638.45	2133.01	2370.48
		1053.72				1229.75	1225.29	961.92			2184.22	2161.91	1668.67									1227.55	1097.75	726.069		2621.1	2435.28	2600
		1420.29				1225.16	1210.26	775.439			2177.04	2148.02	1129.07									1208.69	972.277	794.483		2616.07	2240.63	2465.1
		1609.28				1214.55	1324.14	713.801			2147.49	2130.66	1815.71									1207.18	1134.45	790.069		2604.75	1853.3	2243.31
		1309.72				1208.77	865.032	743.053			2104.73	1982.42	2682.3									1186.31	1156.76	540.69		2595.19	2674.07	2566.62
		929.932				1203.22	834.986	910.468			2050.22	1969.33	1585.09									1186.06	1430.77	945.379		2593.43	2697.13	1777.66
		737.335				1201.53	922.12	1440.4			2041.89	1966.39	2468.4									1166.19	1328.85	715.31		2584.63	2989.73	2315.03
		1087.68				1195.26	957.875	606.979			2040.17	1949.3	1167.47									1152.11	1201.65	621.517		2581.86	2979.82	1891.31
		1095.79				1182.97	917.012	919.609			2033	1910.57	1729.26									1148.58	1009.97	802.759		2569.04	1692.87	3326.07
		905.595				1178.63	843.399	837.338			2008.03	1844.86	1539.39									1136.51	1371.5	1074.48		2566.52	1231.4	2102.34
						1177.66	980.41	986.732			1942.04	1843.26	2009.25									1124.69	1275.79	941.517		2527.04	2503.97	1945.93
						1166.33	560.964	1029.3			1931.71	1822.16	1431									1113.37	1127.01	929.103		2525.28	2329.65	1304.55
						1160.3	785.71	1133.78			1901.29	1806.13	1873.43									1113.12	1142.88	720.276		2519.49	2751.44	2349.52
						1152.1	987.921	813.832			1862.55	1802.12	2228.11									1109.1	1641.04	1026.76		2512.45	2122.84	2185.66
						1149.93	1178.41	1186.79			1717.07	1796.25	1640.46									1107.84	1299.59	1020.69		2510.94	1865.21	2675.31
						1140.77	751.157	963.226			1716.79	1760.99	1710.2									1106.33	1119.82	1121.1		2507.42	2156.81	2527.72
						1123.17	477.736	1166.68			1695.27	1746.57	938.414									1095.27	853.005	1151.45		2505.16	2182.35	2166.34
						1113.28	1049.22	1092.77			1693.26	1724.66	1878.4									1087.47	924.668	1081.66		2496.35	2227.73	2036.97
						1097.61	786.611	1291.01			1684.36	1701.43	1467.3									1055.53	861.932	1069.79		2476.23	806.388	2002.76
						1087.48	713.899	1650.65			1647.06	1668.04	1800.56									1051	945.249	847.172		2472.46	2227.98	1739.31
						1082.9	874.346	1688.52			1643.9	1591.92	2525.33									1030.63	935.826	911.724		2467.93	1905.62	2340.14
						1073.74	994.832	1359.69			1571.88	1577.23	1918.62									1008.5	892.928	1263.72		2466.43	3122.4	1797.79
						1068.19	613.845	1225.45			1543.76	1444.48	1988.61									989.89	749.851	1297.38		2447.31	2482.64	3196.97
						1050.59	862.328	1080.5			1490.96	1436.73	2401.27									964.237	932.603	1176.83		2432.98	2069.03	3537.93
						1049.14	698.275	959.047			1488.95	1373.7	1798.21									926.01	913.757	1059.86		2405.06	2710.52	3132.69
						1048.42	962.983	1040.53			1461.12	1166.16	2260.5									879.231	1175.11	1140.69		2392.74	3079	2555.86
						1046.01	1289.59	1244.25			993.687	1052.11	1895.63									866.657		1369.1		2373.37	2830.29	1667.31
						1040.94	759.269	1446.67			971.019	934.583	1233.55									855.339		1132.69		2356.77	2559.02	3039.72
						1035.4	1094.29	1422.64			847.92		2045.29									801.268		1252.14		2326.09	2741.27	2336.83
						1031.54	1116.52	960.353			717.647		1797.95									764.549		1245.24		2311.5	2214.84	3179.31
						1015.62	633.676	990.127			696.413		1932.72											1196.97		2289.62	3896.55	3246.34
						1006.94	634.878	723.203			584.218		1884.4											1214.62		2237.56	1830.99	3662.07
						1006.46	855.417	726.86			517.073		1303.54											934.621		2218.7	2344.03	3134.9
						1005.5	968.391	801.557					930.579											864.552		2212.16	1690.88	2584.28
						1002.36	633.375	1234.33					1848.62											1039.45		2194.05	1822.56	2381.52
						994.165	874.346						2032.23											1378.76		2141.24	1792.06	2756.69
						984.037	591.912						2523.24											859.31		2093.2	2364.61
						972.704	1433.21						1879.7											1316.14		2052.97	1725.6
						968.605	951.265						2024.66											1846.34		2037.62	1482.59
						947.145	1003.24						1967.46											892.69		2028.32	1673.78
						943.769	750.556						1965.11											1264.55		2026.56	2010.76
						939.429	724.416						1961.45											1019.03		1967.71	1106.92
						935.812	669.431						2510.97											753.103		1944.82	2283.53
						906.154	732.829						1198.03											819.862		1923.44	2832.77
						898.438	822.967						1796.91											795.862		1900.31	2456.61
						897.714	845.803						2072.45											1430.9		1826.37	1898.68
						897.473	886.966						1096.95											1120.83		1733.06	1674.27
						888.792	764.377						1871.87											908.138		1595.24	2529.26
						888.792	784.508						1893.8											1200.83			1393.08
						871.672	952.211						1816.5											818.483			1855.04
						864.921	627.418						2058.87											966.621			2496.78
						838.638	984.53						1693.48											935.724			2681.02
						835.503	1447.68						2121.55											602.207			1656.42
						831.887	1890						1938.99											515.31
						818.142	969.84						1804.22											675.31
						817.419	1195.81						1859.59											450.207
						808.497	977.586						1962.23											839.448
						797.888	768.447						1872.91											740.966
						795.235	970.374						2128.6											495.724
						794.271	1500.3						2591.93											508.69
						784.144	859.795						2276.69											694.621
						771.846	647.45						1397.3											950.069
						766.059	915.886						1987.31											1184.28
						731.578	900.661						1474.87											1044.97
						716.869	1156.01						1977.64											1246.07
						708.671	515.236						2561.38											1445.24
						706.019	803.704						2016.04											1512.83
						652.488	1859.82						1750.16											1216
						644.772	917.488						1658.48											1170.76
						623.794	929.508						1528.94											1242.21
						590.037	759.098						1751.46											1356.97
						562.307	964.765						1879.96											1408.55
						555.073	1357.4						2142.19											1408.83
						521.798	980.791						1719.86											796.138
						495.997	1168.3						1741.02											1075.86
						453.559	1434.86						2280.35											898.759
							662.942						1676.5											1091.59
							1114.34						1046.28											696.552
													2356.35											704.828
													2100.4											696.828
													1817.28											743.172
																								548.69
																								1342.07
																								1562.21
	I	IIA	IIB			I	IIa	IIb
PWT	1484.6	1064.9	1988.73		PWT	1320.52	1019.77	1977.63
	1314.64	937.732	2023.05		PMSTN	1453.54	1081.96	2336.83
	1162.32	1056.67	1921.1			93.498	41.0879	29.9496
PMSTN	1432.4	1209.96	2578.06			60.1292	66.82	121.168
	1583.89	1051.23	2196.2
	1344.33	984.691	2236.22
Averge	1320.52	1019.77	1977.63
Averge	1453.54	1081.96	2336.83
SE	93.0832	41.0879	29.9496
SE	69.9595	66.82	121.168
Ttest	0.317035	0.472266	0.0451084
