# Supplementary material for: Fecal transplant from myostatin deletion pigs positively impacts the gut-muscle axis
Source: eLife journal article supplement (doi:10.7554/elife.81858), 2023-04-11
Supplement: fig3-data1 [file fig3.f.xlsx]

## Sheet: fig3.f
	MyHC I			MyHC Iia			MyHC Iib			MyoD			actin
	1	10753.5		1	19526.9		1	9110.15		1	14510		1	19262.8
	2	12027.4		2	18098.8		2	12655.4		2	16010.8		2	20021.2
	3	10154.6		3	15829.3		3	12711.2		3	18046		3	19845.9
	4	11924.6		4	16716.6		4	15605.5		4	24861.7		4	16201.1
	5	14155.6		5	24468.3		5	24975.3		5	25315.1		5	21597.9
	6	22156.8		6	23865.3		6	24222.8		6	24789.6		6	23809.6
		0.558255		1.00246	1.01371		1.12	0.472941		0.812832	0.753264		0.917772
		0.600733		1.07873	0.903979		0.998761	0.632099		1.08637	0.799693		0.974341
		0.511671	0.556887	0.918806	0.797609	0.9051	0.881239	0.640492	0.581844	1.1008	0.909302	0.820753	1.10789
		0.736036		1.3217	1.03182		1.14001	0.963237		1.65549	1.53457		1.86971
		0.655414		1.17692	1.1329		1.25168	1.15637		1.98743	1.17211		1.42809
		0.930585		1.67105	1.00234		1.10744	1.01736		1.7485	1.04116		1.26854
				Ttest
MyHC I	WT-M	1.00246
		1.07873
		0.918806
	KO-M	1.3217
		1.17692
		1.67105		0.064273
MyHC Iia	WT-M	1.12
		0.998761
		0.881239
	KO-M	1.14001
		1.25168
		1.10744		0.111082
MyHC Iib	WT-M	0.812832
		1.08637
		1.1008
	KO-M	1.65549
		1.98743
		1.7485		0.0042513
MyoD	WT-M	0.917772
		0.974341
		1.10789
	KO-M	1.86971
		1.42809
		1.27366		0.0489622
