# Supplementary material for: Fecal transplant from myostatin deletion pigs positively impacts the gut-muscle axis
Source: eLife journal article supplement (doi:10.7554/elife.81858), 2023-04-11
Supplement: fig3-data1 [file fig3.g.xlsx]

## Sheet: fig3.g
	HK2			PFK1			PKM2			actin
	1	13777.4		1	12119		1	9649		1	18605
	2	15116.6		2	8525.98		2	7386.59		2	23458.8
	3	14055.1		3	8013.86		3	10100.9		3	19901.3
	4	16748.8		4	14358.1		4	18806.8		4	19764.1
	5	20375.5		5	23876.4		5	20187.5		5	21774.8
	6	25331.3		6	27768.2		6	27669.9		6	21792.1
		0.740524		1.06237	0.651386		1.37858	0.518624		1.16019
		0.644387		0.924449	0.363444		0.769188	0.314875		0.704392
		0.706238	0.69705	1.01318	0.40268	0.472504	0.852226	0.507549	0.447016	1.13542
		0.847435		1.21574	0.726473		1.5375	0.951563		2.1287
		0.935735		1.34242	1.09651		2.32064	0.927101		2.07398
		1.16241		1.66761	1.27423		2.69677	1.26972		2.84044
				Ttest
HK2	WT-M	1.06237
		0.924449
		1.01318
	KO-M	1.21574
		1.34242
		1.66761		0.0437545
PFK1	WT-M	1.37858
		0.769188
		0.852226
	KO-M	1.5375
		2.32064
		2.69677		0.0388022
PKM2	WT-M	1.16019
		0.704392
		1.13542
	KO-M	2.1287
		2.07398
		2.84044		0.00943111
