# Supplementary material for: Fecal transplant from myostatin deletion pigs positively impacts the gut-muscle axis
Source: eLife journal article supplement (doi:10.7554/elife.81858), 2023-04-11
Supplement: fig3-data1 [file fig3.h.xlsx]

## Sheet: fig3.h
	p-AKT			AKT			p-mTOR			mTOR			actin
	1	7115.74	0.285738	1	22227.6	0.892564	1	12785.5	0.51341	1	23191.2	0.93126	1	24903.1
	2	5919.57	0.256935	2	20185.4	0.876133	2	11342.4	0.492309	2	20940.2	0.908896	2	23039.2
	3	9391.91	0.431402	3	19736.6	0.906566	3	12045.1	0.553269	3	17967.8	0.825319	3	21770.7
	4	17795.8	0.751776	4	11397.2	0.481468	4	17564.6	0.74201	4	21821.6	0.921845	4	23671.7
	5	20785.1	0.961298	5	19605	0.90672	5	22640.9	1.04713	5	21938.6	1.01465	5	21621.9
	6	14708.6	0.623411	6	19519.7	0.827328	6	18804.2	0.797002	6	20433.6	0.866063	6	23593.7
		0.320131		0.881698				0.551306		0.93795
		0.29326		0.80769				0.541656		0.921531
		0.475863	0.363085	1.31061				0.67037	0.587778	1.14052
		1.56143		4.30044				0.804918		1.36943
		1.06019		2.91996				1.03201		1.75579
		0.753523		2.07533				0.920259		1.56566
			Ttest
p-AKT	WT-M	0.881698
		0.80769
		1.31061
	KO-M	4.30044
		2.91996
		2.07533	0.0346674
p-mTOR	WT-M	0.93795
		0.921531
		1.14052
	KO-M	1.36943
		1.75579
		1.56566	0.0129203
