# Supplementary material for: Fecal transplant from myostatin deletion pigs positively impacts the gut-muscle axis
Source: eLife journal article supplement (doi:10.7554/elife.81858), 2023-04-11
Supplement: fig3-data1 [file fig3.i.xlsx]

## Sheet: fig3.i
		3(g)
WT-M	2091	134
	160	142
	2086	131
	2095	153
	2089	197
	2083	169
	2098	171
	2099	151
KO-M	2081	177
	158	181
	2094	157
	2085	206
	2097	188
	2087	204
	2093	168
	2082	165
average	WT-M	156
	KO-M	180.75
Ttest		0.0271079
SE	WT-M	7.80796
SE	KO-M	6.29555
