# Supplementary material for: Fecal transplant from myostatin deletion pigs positively impacts the gut-muscle axis
Source: eLife journal article supplement (doi:10.7554/elife.81858), 2023-04-11
Supplement: fig3-data1 [file fig3.j.xlsx]

## Sheet: fig3.j
		time(min)
WT-M	2091	28.32
	160	32.21
	2086	111.46
	2095	53.38
	2089	18.47
	2083	123.33
	2098	17.28
	2099	13.05
KO-M	2081	19.22
	158	7.02
	2094	7.22
	2085	10.12
	2097	37.07
	2087	24.59
	2093	7.12
	2082	9.37
Average	WT-M	49.6875
	KO-M	15.2163
Ttest		0.0483121
SE	WT-M	15.4584
SE	KO-M	3.86907
