# Supplementary material for: Fecal transplant from myostatin deletion pigs positively impacts the gut-muscle axis
Source: eLife journal article supplement (doi:10.7554/elife.81858), 2023-04-11

Figure 3F source data

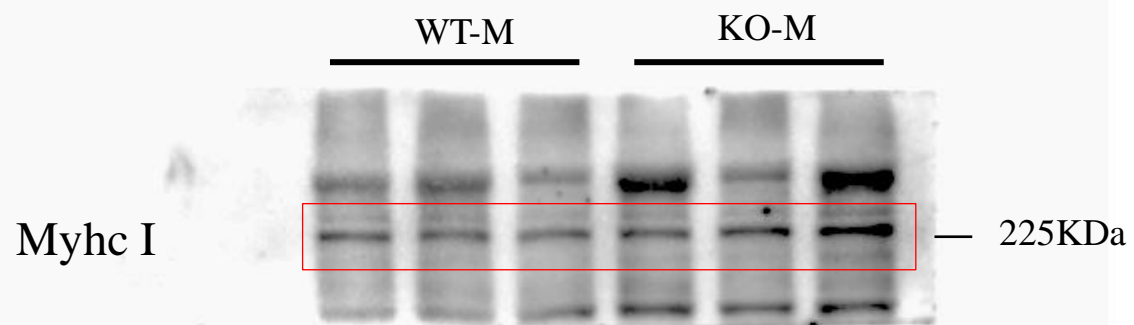

Figure 3F source data

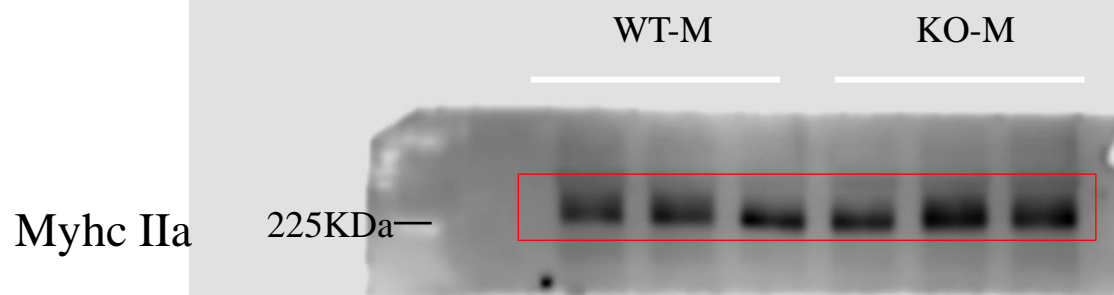

Figure 3F source data

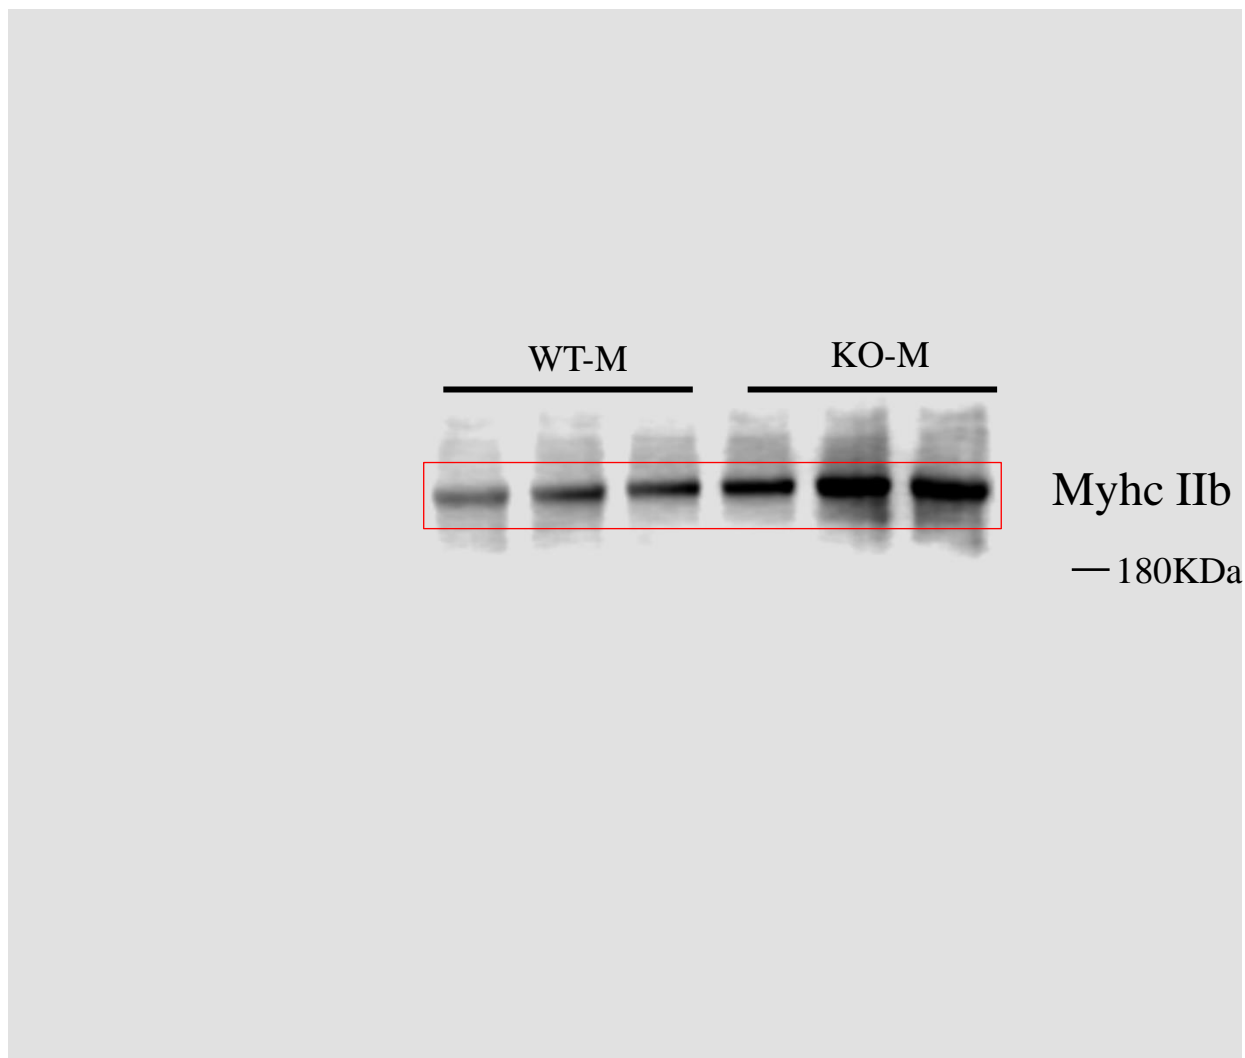

Figure 3F source data

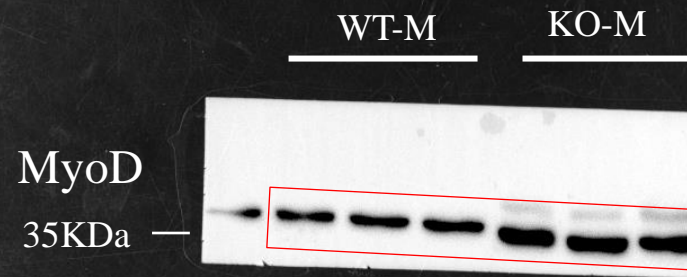

Figure 3F source data

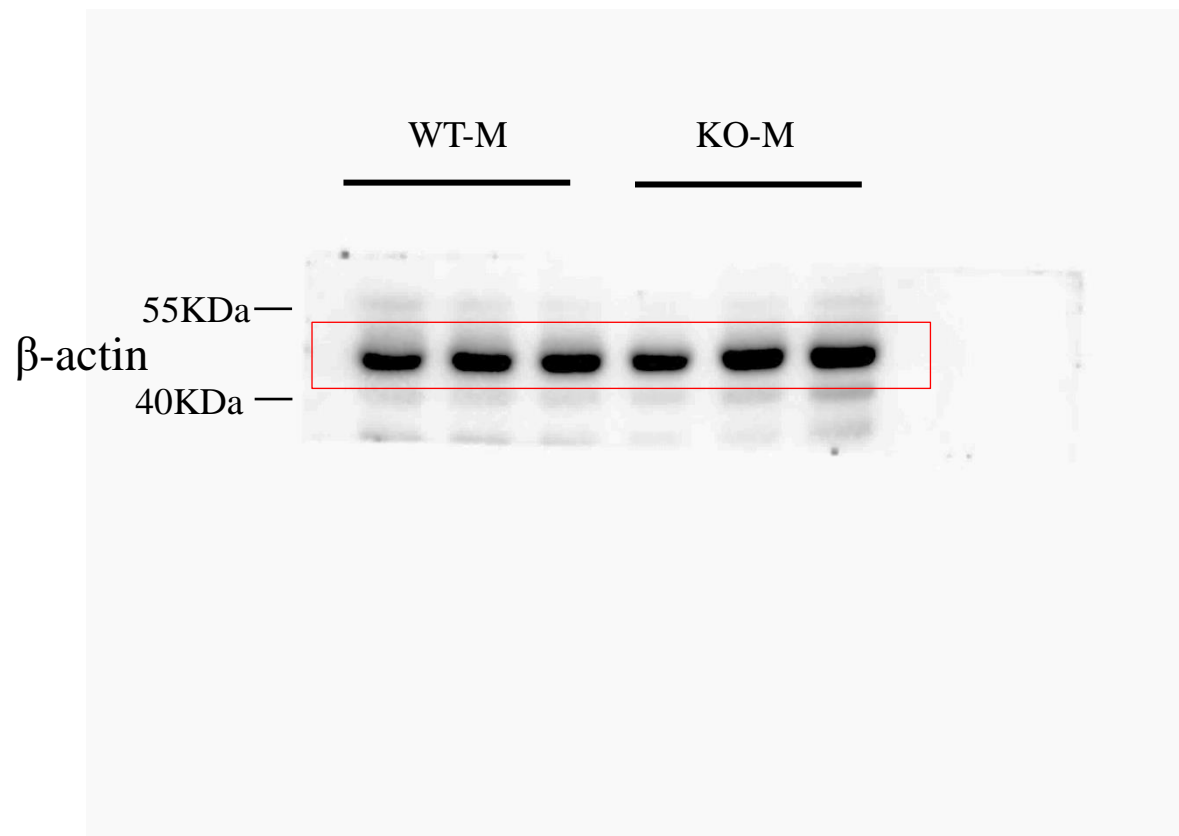

Figure 3G source data

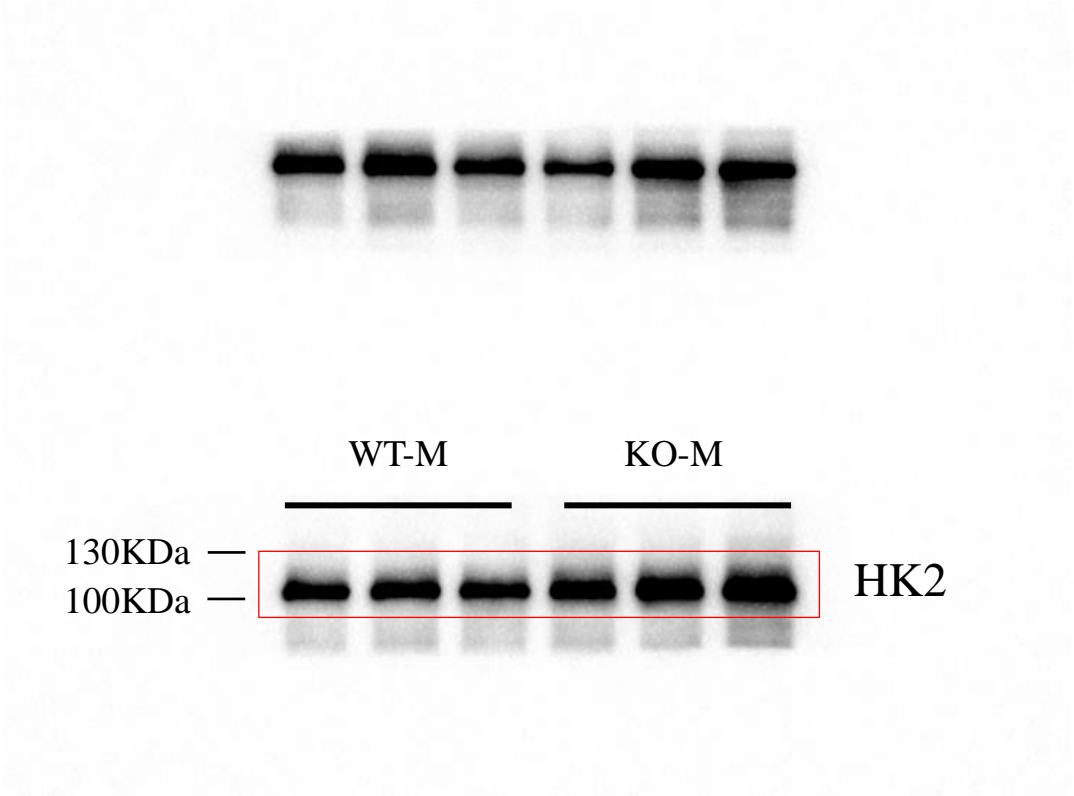

Figure 3G source data

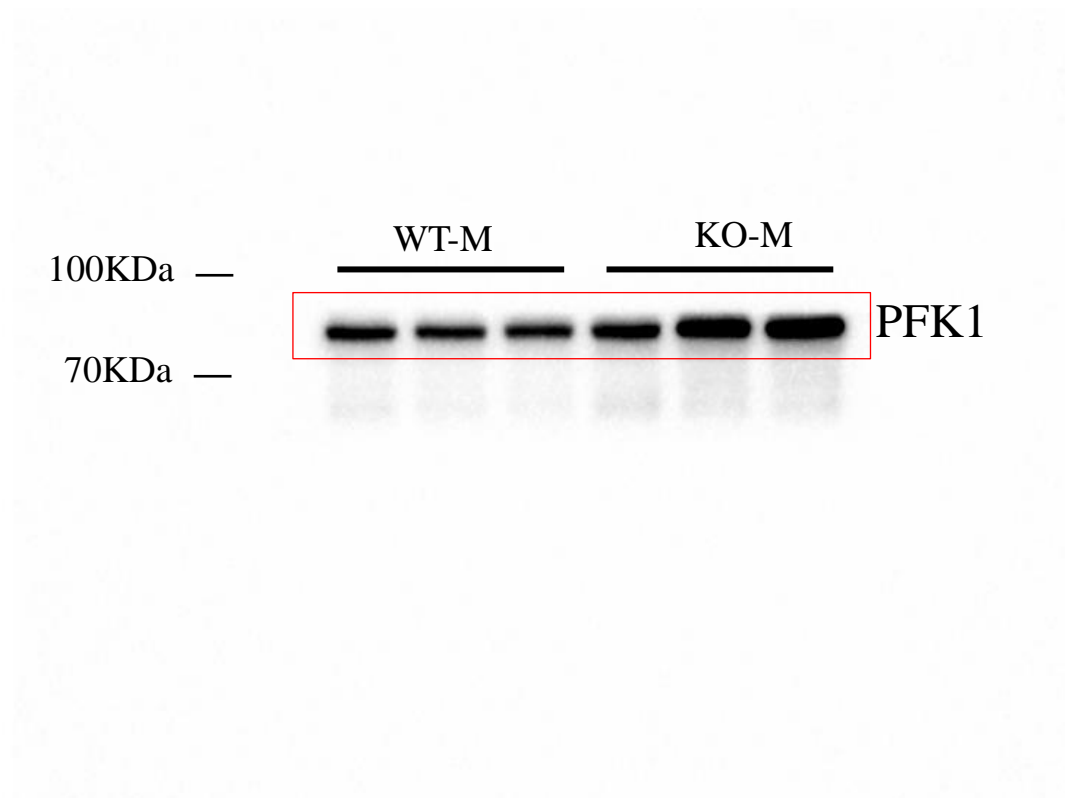

Figure 3G source data

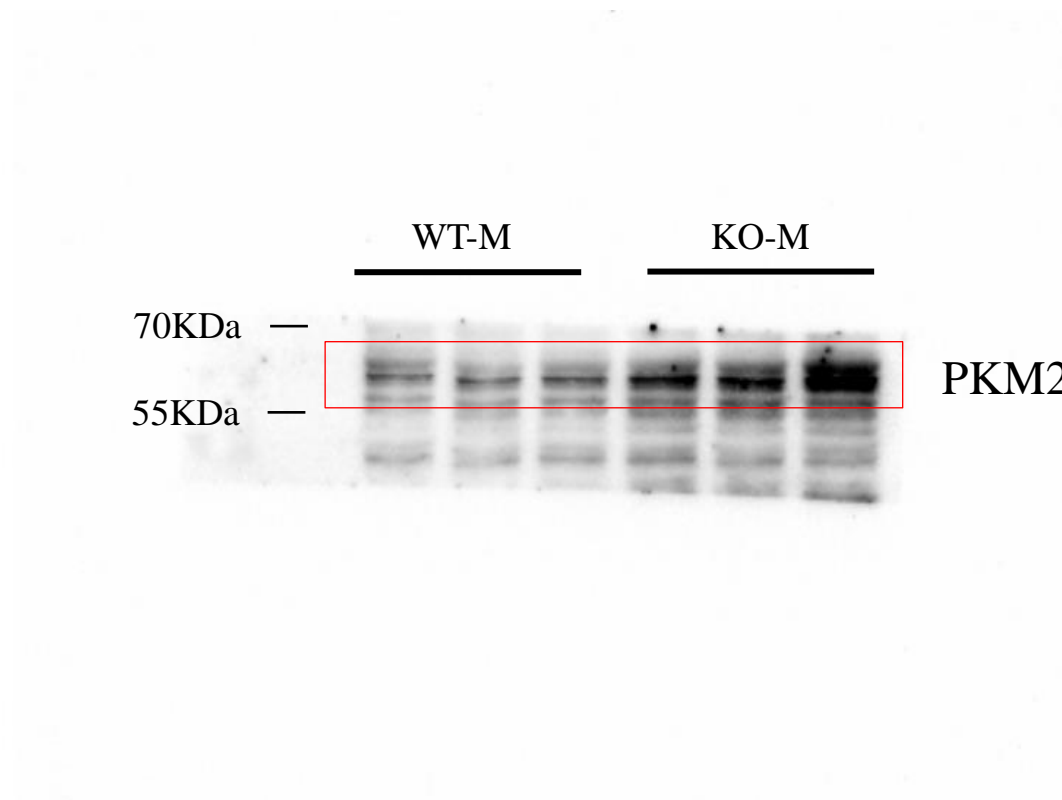



Figure 3G source data

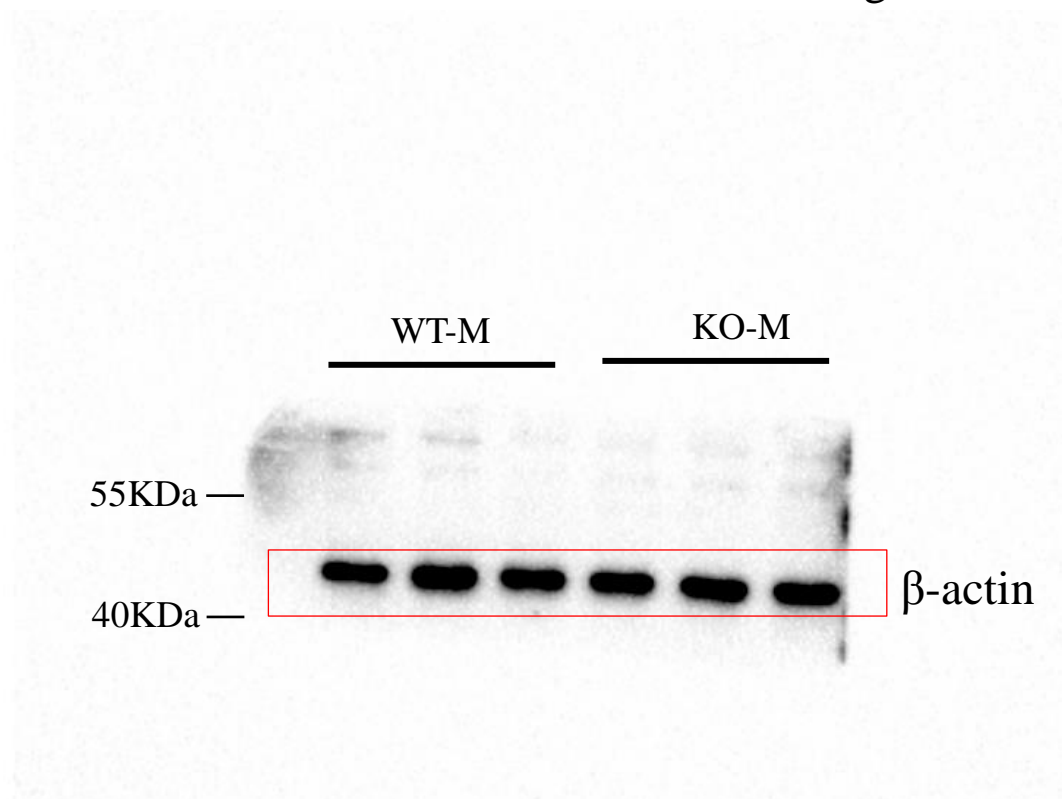

Figure 3H source data

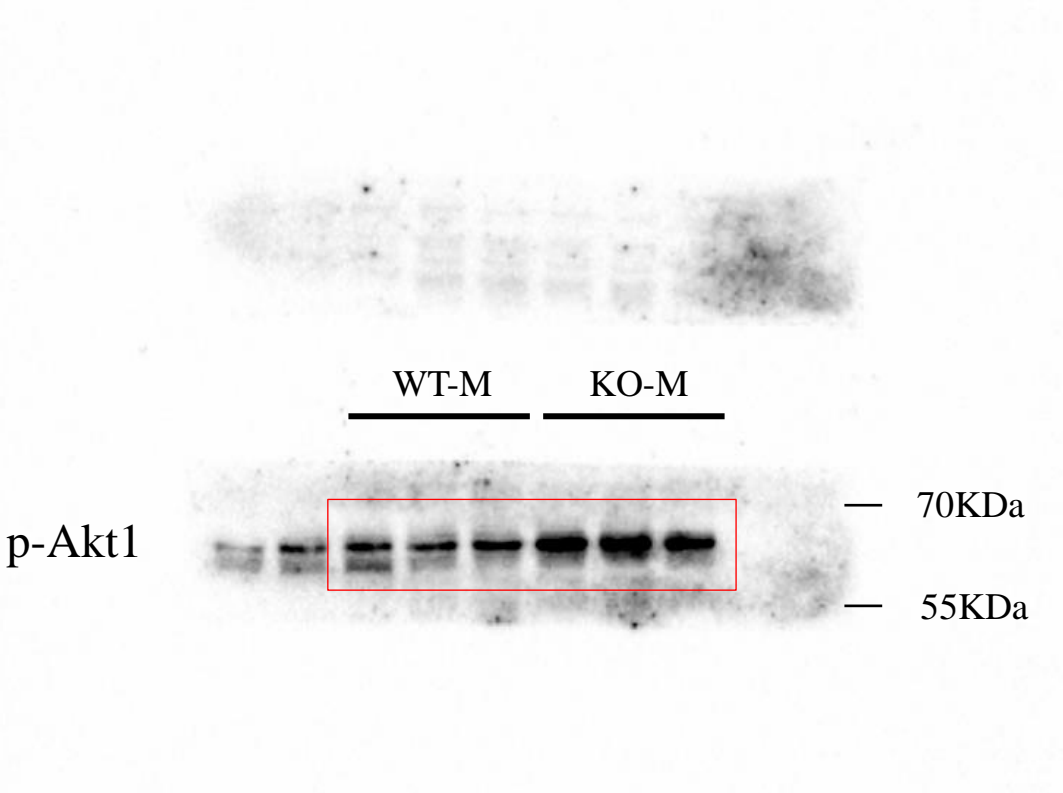

Figure 3H source data

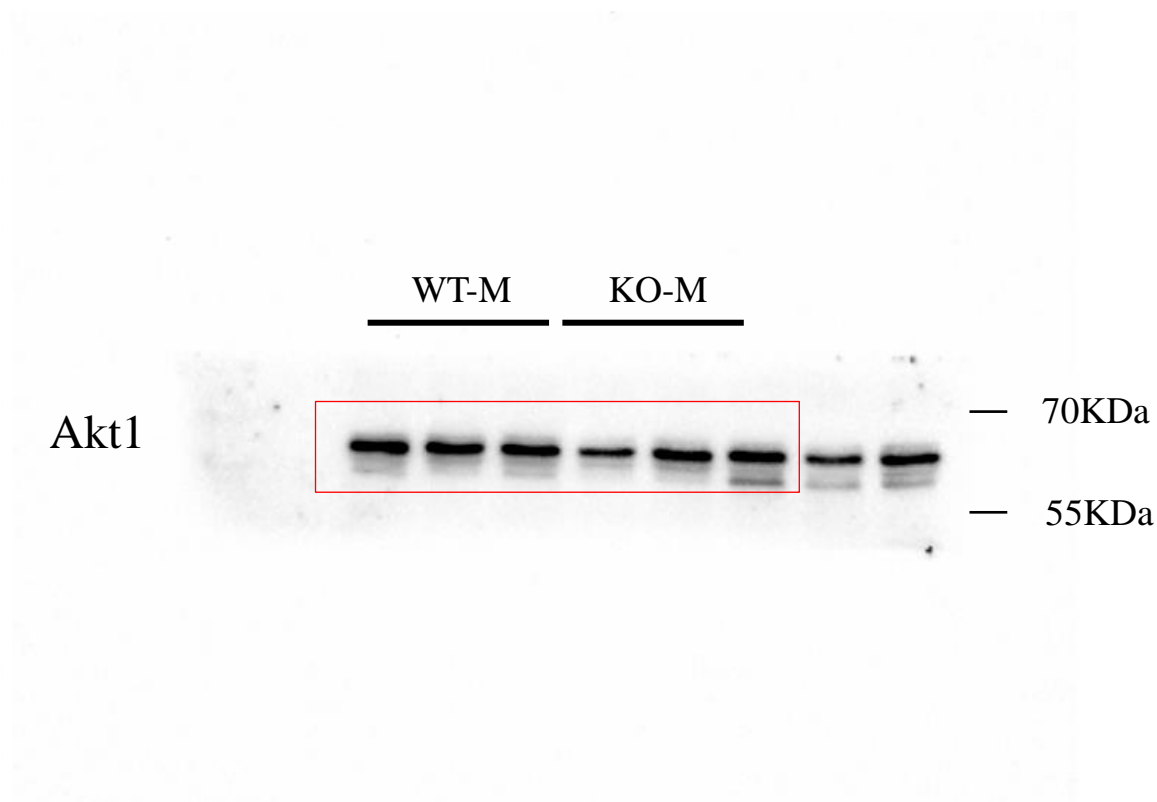

Figure 3H source data

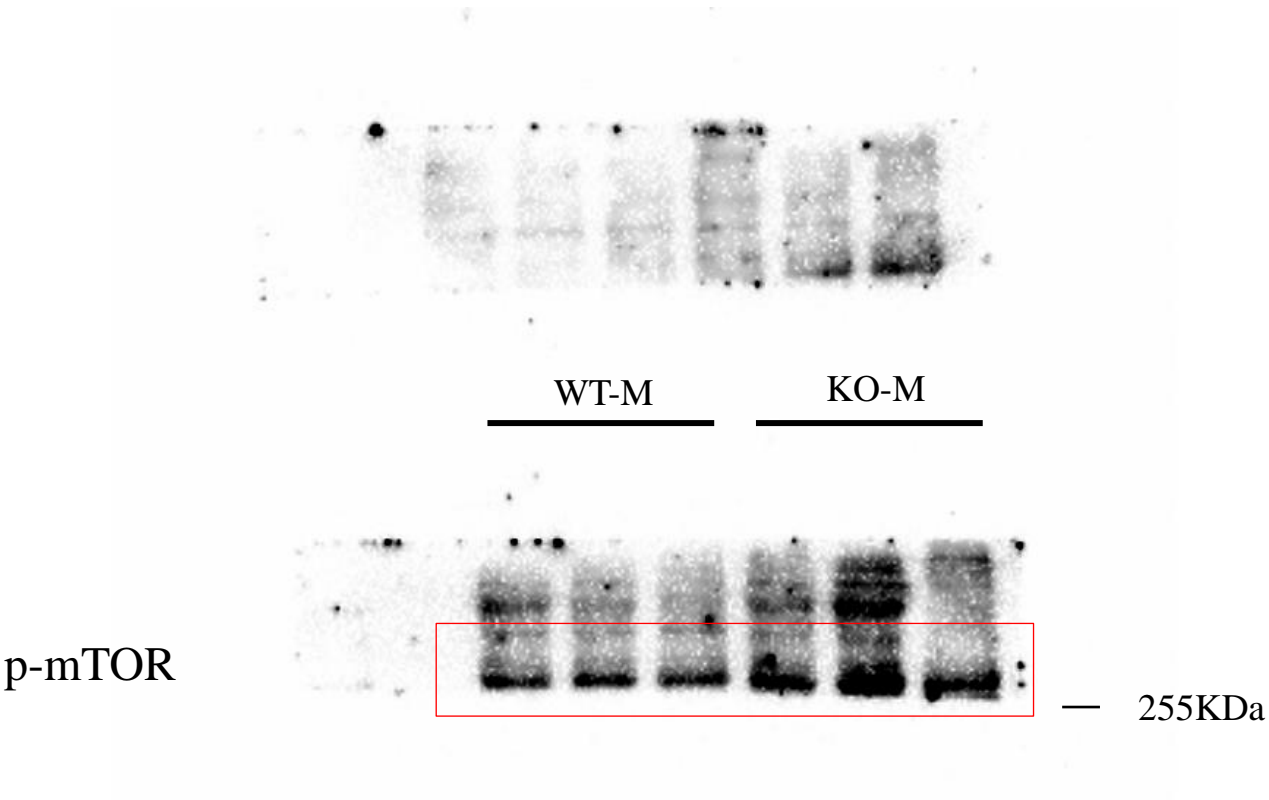

Figure 3H source data

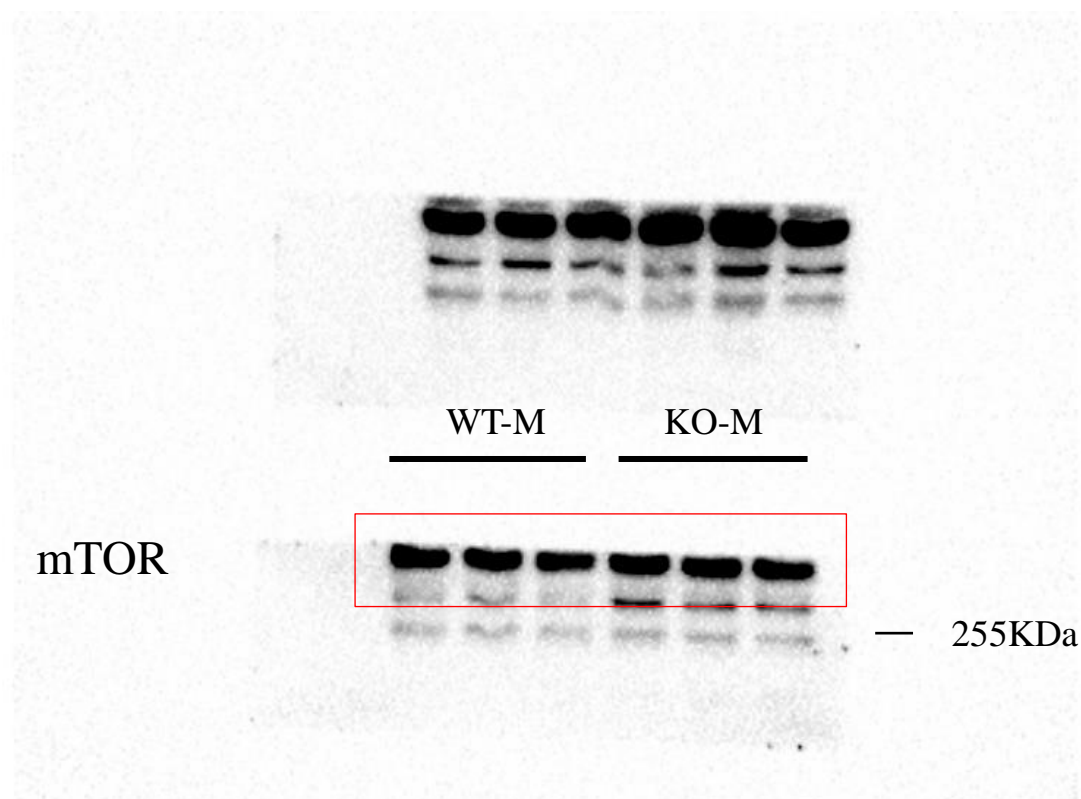

Figure 3H source data

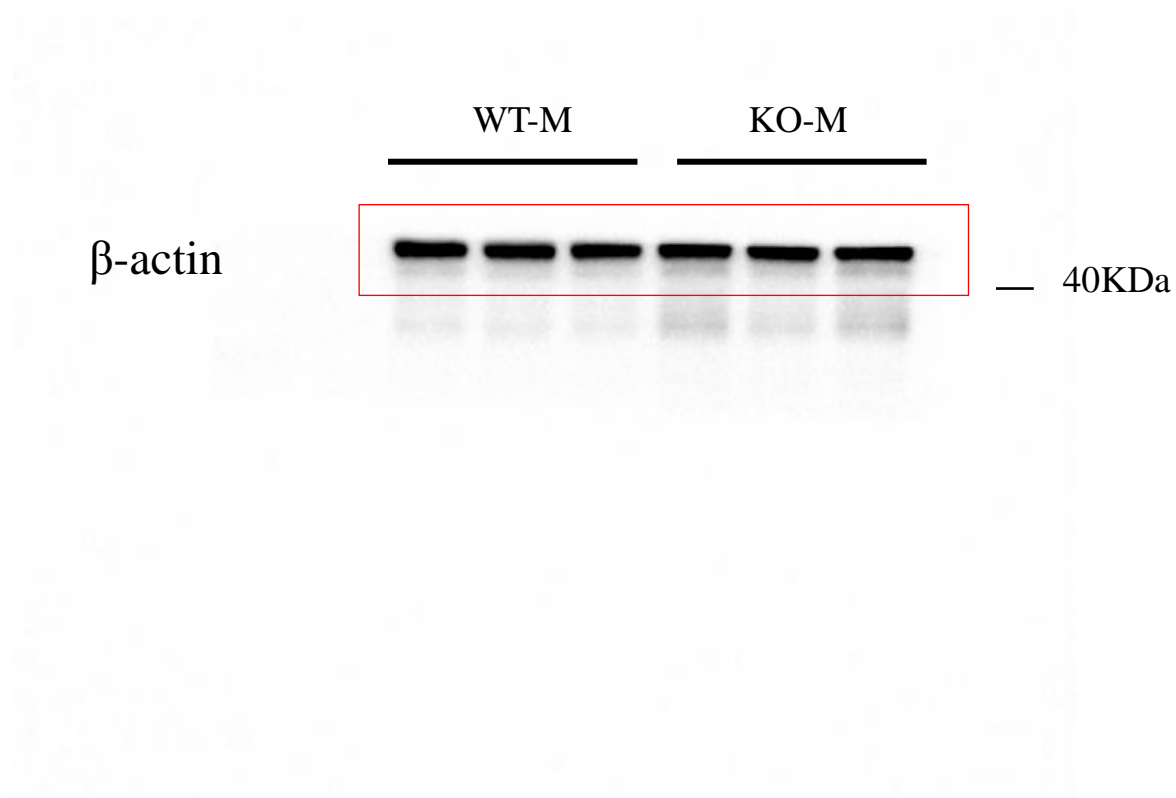

Supplement: fig3-data2 [file elife-81858-fig3-data2-v2.zip]
