# Supplementary material for: Fecal transplant from myostatin deletion pigs positively impacts the gut-muscle axis
Source: eLife journal article supplement (doi:10.7554/elife.81858), 2023-04-11
Supplement: fig3-figsupp1-data1 [file elife-81858-fig3-figsupp1-data1-v2.zip]

## Sheet: a
Food Intake
Days	0	1	2	3	4	5	6	7	8	9	10
WT-M		3.7	3.8875	3.975	3.55	3.475	3.6875	3.6	3.75	3.575	3.825
KO-M		3.9625	4	4.075	3.85	3.6625	3.825	4.0125	3.7875	3.7375	3.925
SE		0.162569	0.140709	0.17087	0.13496	0.137256	0.115631	0.114953	0.136277	0.166637	0.129215
SE		0.133547	0.2163	0.198881	0.221198	0.182187	0.207666	0.204797	0.18071	0.235991	0.239605

## Sheet: b
Physical activity （counts/day）		TOTAL	1	2	3	4	5	6	7	8
WT-M	2091	4695	305	629	108	516	810	535	1215	577
	160	3124	175	398	53	218	823	503	568	386
	2086	3957	452	268	30	282	1046	611	674	594
	2095	5635	289	446	98	1260	875	1157	1078	432
	2089	5723	206	430	389	1100	1392	808	919	479
	2083	4832	447	437	215	964	644	701	687	737
	2098	5123	440	366	78	1227	400	732	1036	844
	2099	4839	389	188	219	784	763	416	1441	639
KO-M	2081	3440	415	242	164	355	900	392	663	309
	158	3340	319	322	238	147	517	393	761	643
	2094	4290	620	326	172	307	722	258	649	1236
	2085	4976	768	360	111	838	693	594	900	712
	2097	4948	516	259	76	815	425	1306	1150	401
	2087	5432	718	314	263	1143	504	702	966	822
	2093	4678	586	297	153	719	529	591	1033	770
	2082	4550	294	306	266	988	707	723	846	420
average	WT-M	4741	337.875	395.25	148.75	793.875	844.125	682.875	952.25	586
	KO-M	4456.75	529.5	303.25	180.375	664	624.625	619.875	871	664.125
SE	WT-M	303.516	34.9213	41.4339	37.7124	130.848	91.6018	73.0756	94.663	48.9145
	KO-M	261.466	53.0694	11.3741	21.0978	106.949	47.2493	96.9672	53.3579	89.7948
	TTEST	0.489635	0.0206354	0.0770487	0.52815	0.511278	0.0803452	0.659629	0.519435	0.520928

## Sheet: c
		Energy intake (KJ/day)
WT-M	2091	49.3107
	160	45.1318
	2086	51.818
	2095	56.8327
	2089	59.34
	2083	61.0116
	2098	50.1465
	2099	59.34
KO-M	2081	50.1465
	158	56.8327
	2094	56.8327
	2085	56.8327
	2097	54.3254
	2087	62.6831
	2093	54.3254
	2082	58.5042
Average	WT-M	54.1164
	KO-M	56.3103
Ttest		0.378918
SE	WT-M	2.0457
SE	KO-M	1.28256

## Sheet: d
		Absorbed energy (KJ/day)
WT-M	2091	34.6721
	160	32.8764
	2086	35.3273
	2095	39.1042
	2089	41.9755
	2083	44.8373
	2098	36.2968
	2099	42.8957
KO-M	2081	35.4144
	158	40.0952
	2094	40.3417
	2085	38.8176
	2097	37.8004
	2087	45.9413
	2093	37.1704
	2082	41.9128
Average	WT-M	38.4982
	KO-M	39.6867
Ttest		0.54608
SE	WT-M	1.54183
SE	KO-M	1.14618

## Sheet: e
		NO absorbed energy (KJ/day)
WT-M	2091	14.6386
	160	12.2554
	2086	16.4907
	2095	17.7285
	2089	17.3645
	2083	16.1742
	2098	13.8497
	2099	16.4443
KO-M	2081	14.7321
	158	16.7375
	2094	16.491
	2085	18.0151
	2097	16.525
	2087	16.7419
	2093	17.155
	2082	16.5915
Average	WT-M	15.6183
	KO-M	16.6236
Ttest		0.194648
SE	WT-M	0.663476
SE	KO-M	0.323262
