# Supplementary material for: Fecal transplant from myostatin deletion pigs positively impacts the gut-muscle axis
Source: eLife journal article supplement (doi:10.7554/elife.81858), 2023-04-11
Supplement: fig4-data1 [file fig4.b.xlsx]

## Sheet: fig4.b1
	%	Peptostreptococcales-Tissierellales
WT-M	2091	0.074057
	160	0.153221
	2086	0.0459664
	2095	0.155775
	2089	0.160883
	2083	0.0280906
	2098	0.0944866
	2099	0.566919
KO-M	2081	0.344748
	158	0.503077
	2094	0.633315
	2085	0.970403
	2097	1.02403
	2087	0.0817181
	2093	0.308997
	2082	0.176205
Average	WT-M	0.159925
	KO-M	0.505312
Ttest		0.0250481
SE	WT-M	0.0609054
SE	KO-M	0.123479

## Sheet: fig4.b2
	%	Peptostreptococcaceae
WT-M	2091	0.0127685
	160	0.0510738
	2086	0.0178758
	2095	0.0127685
	2089	0.0204295
	2083	0
	2098	0.0459664
	2099	0.467326
KO-M	2081	0.104701
	158	0.337087
	2094	0.503077
	2085	0.901453
	2097	0.881024
	2087	0.0612886
	2093	0.268138
	2082	0.137899
Average	WT-M	0.078526
	KO-M	0.399333
Ttest		0.0280516
SE	WT-M	0.0558772
SE	KO-M	0.118429

## Sheet: fig4.b3
	%	Romboutsia
WT-M	2091	0.0127685
	160	0.0306443
	2086	0.0102148
	2095	0.0102148
	2089	0.0204295
	2083	0
	2098	0.0459664
	2099	0.398376
KO-M	2081	0.0970403
	158	0.321765
	2094	0.426466
	2085	0.852933
	2097	0.804413
	2087	0.0510738
	2093	0.23494
	2082	0.11747
Average	WT-M	0.0660768
	KO-M	0.363263
Ttest		0.0271634
SE	WT-M	0.0477372
SE	KO-M	0.110625
