# Supplementary material for: Fecal transplant from myostatin deletion pigs positively impacts the gut-muscle axis
Source: eLife journal article supplement (doi:10.7554/elife.81858), 2023-04-11
Supplement: fig4-figsupp1-data1 [file elife-81858-fig4-figsupp1-data1-v2.zip]

## Sheet: a
		ace
WT-M	CW1	571.575
	CW2	497.346
	CW4	351.221
	CW6	548.96
	CW7	559.126
	CW8	392.722
	CW9	388.911
	CW10	659.025
KO-M	CM1	536.076
	CM3	759.921
	CM4	497.472
	CM5	583.735
	CM6	606.242
	CM7	338.178
	CM9	516.829
	CM10	492.342

## Sheet: b
		chao1
WT-M	CW1	749.107
	CW2	660.333
	CW4	478.833
	CW6	785.833
	CW7	905.882
	CW8	568.067
	CW9	476.4
	CW10	1085.27
KO-M	CM1	657.273
	CM3	955.275
	CM4	645.333
	CM5	899.158
	CM6	1185.55
	CM7	537.6
	CM9	748.455
	CM10	661.556

## Sheet: c
		shannon
WT-M	CW1	4.57516
	CW2	5.63247
	CW4	3.87525
	CW6	5.91478
	CW7	4.73325
	CW8	2.50789
	CW9	5.30939
	CW10	3.46766
KO-M	CM1	6.00964
	CM3	5.40775
	CM4	5.65019
	CM5	5.26732
	CM6	5.62399
	CM7	2.00064
	CM9	4.42511
	CM10	4.32318

## Sheet: d
		simpson
WT-M	CW1	0.888041
	CW2	0.955697
	CW4	0.788384
	CW6	0.96862
	CW7	0.875309
	CW8	0.52068
	CW9	0.943481
	CW10	0.762802
KO-M	CM1	0.96861
	CM3	0.916364
	CM4	0.946673
	CM5	0.943907
	CM6	0.952581
	CM7	0.38779
	CM9	0.869616
	CM10	0.893472
