# Supplementary material for: Fecal transplant from myostatin deletion pigs positively impacts the gut-muscle axis
Source: eLife journal article supplement (doi:10.7554/elife.81858), 2023-04-11
Supplement: fig5-data1 [file fig5.a.xlsx]

## Sheet: fig5.a1
	μmol/g	SCFAs
	WT-M	6.07996
		4.06628
		4.27266
		8.15064
		5.96216
		4.88156
		4.21145
	KO-M	14.9045
		15.2081
		5.77072
		7.79108
		8.48506
		3.45623
		8.19506
	Average	5.37496
		9.11582
	Ttest	0.0548492
	SE	0.557869
	SE	1.66795
		SCFAs
	WT-M	5.37496
	KO-M	9.11582
	SE	0.557869
	SE	1.66795

## Sheet: fig5.a2
μmol/g		acetic acid C2	propionic acid C3	isobutyric acid iso-C4	butyric acid C4	2-methyl-butyric acid m-C4	isovaleric acid iso-C5	valeric acid C5	capric acid C6
WT-M	2091	1.21121	1.87109	0.248668	1.81515	0.188103	0.252533	0.479256	0.0139571
	160	0.953897	1.30699	0.108328	1.25819	0.0517252	0.10348	0.271738	0.0119392
	2095	0.927042	1.58961	0.132391	1.18009	0.0864248	0.124654	0.223131	0.00932143
	2089	2.00954	2.20401	0.258614	2.58279	0.214817	0.386409	0.475604	0.0188429
	2083	1.15273	1.70042	0.238219	1.79097	0.239374	0.217504	0.597019	0.025924
	2098	0.940773	1.76731	0.17189	1.17458	0.261837	0.172489	0.382307	0.0103804
	2099	0.897968	1.21038	0.145729	1.409	0.155483	0.143995	0.226906	0.0219881
KO-M	2081	2.87667	3.33334	0.754249	4.83456	0.734584	0.663803	1.6821	0.0251394
	158	3.0007	3.46069	0.716032	4.7969	0.663295	0.600566	1.94384	0.0261167
	2094	1.19356	1.74373	0.23577	1.77665	0.15351	0.20214	0.449614	0.0157463
	2085	1.75666	2.39461	0.228405	2.56056	0.122141	0.204208	0.505476	0.0190145
	2097	1.36819	2.08117	0.621426	1.84518	0.843895	0.822961	0.888197	0.014043
	2093	0.736943	1.13943	0.100333	1.05774	0.0952024	0.110007	0.208745	0.00783575
	2082	1.54879	1.92996	0.28508	2.86893	0.31315	0.281936	0.939617	0.0275985
Average	WT-M	1.15617	1.66426	0.186263	1.60154	0.171109	0.200152	0.379423	0.0160505
	KO-M	1.78307	2.29756	0.420185	2.82007	0.417968	0.412232	0.94537	0.0193563
Ttest		0.102605	0.0898994	0.0439292	0.0621093	0.070795	0.0808513	0.0437791	0.383281
SE	WT-M	0.149425	0.127733	0.0232247	0.192679	0.029584	0.0367426	0.0547415	0.00238674
SE	KO-M	0.321758	0.318669	0.101298	0.560202	0.120955	0.105015	0.245188	0.00276537
		C2	C3	iso-C4	C4	m-C4	iso-C5	C5	C6
	WT-M	1.15617	1.66426	0.186263	1.60154	0.171109	0.200152	0.379423	0.0160505
	KO-M	1.78307	2.29756	0.420185	2.82007	0.417968	0.412232	0.94537	0.0193563
	SE	0.149425	0.127733	0.0232247	0.192679	0.029584	0.0367426	0.0547415	0.00238674
	SE	0.321758	0.318669	0.101298	0.560202	0.120955	0.105015	0.245188	0.00276537
