# Supplementary material for: Fecal transplant from myostatin deletion pigs positively impacts the gut-muscle axis
Source: eLife journal article supplement (doi:10.7554/elife.81858), 2023-04-11
Supplement: fig5-data1 [file fig5.b.xlsx]

## Sheet: fig5.b1
μmol/g	MCFA
WT-M	0.019487
	0.0167758
	0.0220896
	0.0307718
	0.033484
	0.0177036
	0.0495143
KO-M	0.0245305
	0.0288341
	0.0307784
	0.0222489
	0.0396098
	0.0185598
	0.0325249
Average	0.027118
	0.0281552
Ttest	0.84502
SE	0.00445768
SE	0.00266252
WT-M	0.027118
KO-M	0.0281552
SE	0.00445768
SE	0.00266252

## Sheet: fig5.b2
μmol/g		heptanoic acid C7	octanoic acid C8	nonanoic acid C9	decanoic acid C10	undecanoid acid C11	lauric acid C12
WT-M	2091	0.00069927	0.00183629	0.00385745	0.00232926	0.000782407	0.00998235
	160	0.000702741	0.00210483	0.00375184	0.00283988	0.000709618	0.00666688
	2095	0.00037677	0.00135096	0.00318703	0.00274254	0.00061953	0.0138128
	2089	0.00072368	0.00337882	0.00560763	0.00664046	0.00169484	0.0127264
	2083	0.00130482	0.00364395	0.00756691	0.00653402	0.00112914	0.0133052
	2098	0.000650161	0.00138276	0.00242906	0.00182789	0.000804233	0.0106095
	2099	0.000847221	0.00417711	0.0111348	0.00720165	0.00151348	0.02464
KO-M	2081	0.000556966	0.00189972	0.00582842	0.00254343	0.00100749	0.0126945
	158	0.000430397	0.00242108	0.00722187	0.0049193	0.000929353	0.0129121
	2094	0.000872667	0.00280581	0.00745526	0.0043581	0.000816929	0.0144696
	2085	0.000453821	0.00137783	0.00334268	0.00346622	0.00102661	0.0125817
	2097	0.00120841	0.00295913	0.00725685	0.00939201	0.00216748	0.0166259
	2093	0.00051325	0.00157468	0.00292663	0.00147979	0.000762262	0.0113031
	2082	0.00109633	0.00315092	0.00777349	0.0042916	0.00104448	0.0151681
Average	WT-M	0.00075781	0.00255353	0.00536211	0.00430224	0.00103618	0.0131061
	KO-M	0.000733119	0.00231274	0.00597217	0.00435006	0.0011078	0.0136793
Ttest		0.881165	0.646474	0.66883	0.971361	0.771797	0.802552
SE	WT-M	0.000105968	0.000437492	0.00115919	0.000892308	0.000159518	0.00213346
SE	KO-M	0.000122115	0.000265679	0.000769455	0.000951593	0.000181228	0.000688905
		C7	C8	C9	C10	C11	C12
	WT-M	0.00075781	0.00255353	0.00536211	0.00430224	0.00103618	0.0131061
	KO-M	0.000733119	0.00231274	0.00597217	0.00435006	0.0011078	0.0136793
	SE	0.000105968	0.000437492	0.00115919	0.000892308	0.000159518	0.00213346
	SE	0.000122115	0.000265679	0.000769455	0.000951593	0.000181228	0.000688905
