# Supplementary material for: Fecal transplant from myostatin deletion pigs positively impacts the gut-muscle axis
Source: eLife journal article supplement (doi:10.7554/elife.81858), 2023-04-11
Supplement: fig5-data1 [file fig5.c.xlsx]

## Sheet: fig5.c1
μmol/g	FFA
WT-M	11.3175
	12.0544
	8.60462
	10.5366
	14.9969
	8.35785
	8.26576
KO-M	8.65233
	6.47501
	11.855
	9.71243
	8.22268
	6.89752
	8.03737
Average	10.5905
	8.55033
Ttest	0.102965
SE	0.931257
SE	0.684711
		FFA
Average	WT-M	10.5905
	KO-M	8.55033
Ttest		0.102965
SE	WT-M	0.931257
SE	KO-M	0.684711

## Sheet: fig5.c2
μmol/g		FFA22:6	FFA22:5	FFA22:4	FFA20:5	FFA20:4	FFA20:3	FFA18:4	FFA18:3	FFA18:2	FFA18:1	FFA18:0	FFA16:1	FFA16:0	FFA15:0	FFA14:0
WT-M	2091	0.598044	0.13666	0.0156665	0.232938	0.200304	0.0203049	0.122009	0.37336	4.90437	0.859942	1.58014	0.0728552	2.11144	0.0314607	0.058061
	160	0.794038	0.160991	0.0199542	0.343479	0.168634	0.0158991	0.161226	0.419532	5.24309	0.779864	1.58231	0.0397717	2.1822	0.0917748	0.0516465
	2095	0.438584	0.0914392	0.014906	0.194187	0.142663	0.0132524	0.0980358	0.240749	3.34654	0.590454	1.47484	0.0291429	1.83985	0.0473091	0.042663
	2089	0.57006	0.102493	0.0109629	0.278477	0.157118	0.0139194	0.151725	0.383911	4.7874	0.642769	1.21682	0.0570103	2.08294	0.0228851	0.0580855
	2083	0.859285	0.196971	0.0184689	0.483482	0.241076	0.0229709	0.259885	0.599224	6.97729	1.04139	1.55516	0.0629499	2.49355	0.119501	0.0657402
	2098	0.408939	0.11241	0.0203703	0.190838	0.157284	0.0198911	0.0871561	0.227516	3.05807	0.674753	1.62814	0.0356905	1.64077	0.0543707	0.0416607
	2099	0.2995	0.079027	0.0132774	0.16308	0.0907514	0.0122169	0.0946582	0.253102	3.36987	0.673766	1.43366	0.0350211	1.67971	0.0266627	0.0414553
KO-M	2081	0.407824	0.096519	0.0117102	0.199052	0.164576	0.0164734	0.108757	0.299902	3.98438	0.60069	1.0701	0.0530978	1.5679	0.0257624	0.0455899
	158	0.417172	0.0894303	0.011641	0.174713	0.0809413	0.00970013	0.0995478	0.209134	2.69802	0.398914	0.97472	0.0233703	1.23589	0.0196818	0.0321386
	2094	0.791326	0.164487	0.0178948	0.353695	0.214495	0.0198308	0.184094	0.368763	5.10724	0.85368	1.4844	0.0648301	2.1101	0.057432	0.062723
	2085	0.157642	0.0422714	0.0130288	0.0696554	0.0509581	0.00758066	0.0516777	0.126028	4.02795	0.36322	0.922418	0.0291322	2.02318	0.0269187	0.0304547
	2097	0.283417	0.106653	0.0293372	0.110597	0.137251	0.0280542	0.0600544	0.156471	2.04594	1.06322	2.12871	0.056388	1.81905	0.142357	0.0551676
	2093	0.272666	0.0752308	0.021489	0.120012	0.0915309	0.0108653	0.0717963	0.178182	2.50304	0.618156	1.41586	0.0315168	1.4216	0.0300716	0.0355085
	2082	0.368309	0.112795	0.0190185	0.160792	0.115177	0.0148429	0.0808538	0.305899	3.03638	0.701494	1.40871	0.0380359	1.58782	0.0419031	0.0453346
Average	WT-M	0.566921	0.125713	0.0162295	0.269497	0.165404	0.0169221	0.139242	0.356771	4.52666	0.751847	1.49587	0.0474916	2.00435	0.0562805	0.0513303
	KO-M	0.385479	0.0981981	0.0177314	0.169788	0.122133	0.0153354	0.0938258	0.234911	3.34328	0.657053	1.34356	0.0423387	1.68079	0.0491609	0.0438453
Ttest		0.119679	0.21929	0.596623	0.0944666	0.140007	0.615553	0.135705	0.0669553	0.0999372	0.406318	0.375818	0.563061	0.0753727	0.743807	0.225386
SE	WT-M	0.0773027	0.0158208	0.00133234	0.0425003	0.0177143	0.00156232	0.0228292	0.0499165	0.525926	0.0590174	0.052952	0.00629423	0.11477	0.0137575	0.00366715
SE	KO-M	0.0758387	0.0141537	0.00241995	0.0347752	0.0208785	0.00265199	0.0168851	0.034181	0.405056	0.0930019	0.156901	0.00595388	0.120234	0.0162438	0.00456613
		FFA22:6	FFA22:5	FFA22:4	FFA20:5	FFA20:4	FFA20:3	FFA18:4	FFA18:3	FFA18:2	FFA18:1	FFA18:0	FFA16:1	FFA16:0	FFA15:0	FFA14:0
Average	WT-M	0.566921	0.125713	0.0162295	0.269497	0.165404	0.0169221	0.139242	0.356771	4.52666	0.751847	1.49587	0.0474916	2.00435	0.0562805	0.0513303
	KO-M	0.385479	0.0981981	0.0177314	0.169788	0.122133	0.0153354	0.0938258	0.234911	3.34328	0.657053	1.34356	0.0423387	1.68079	0.0491609	0.0438453
Ttest		0.119679	0.21929	0.596623	0.0944666	0.140007	0.615553	0.135705	0.0669553	0.0999372	0.406318	0.375818	0.563061	0.0753727	0.743807	0.225386
SE	WT-M	0.0773027	0.0158208	0.00133234	0.0425003	0.0177143	0.00156232	0.0228292	0.0499165	0.525926	0.0590174	0.052952	0.00629423	0.11477	0.0137575	0.00366715
SE	KO-M	0.0758387	0.0141537	0.00241995	0.0347752	0.0208785	0.00265199	0.0168851	0.034181	0.405056	0.0930019	0.156901	0.00595388	0.120234	0.0162438	0.00456613
