# Supplementary material for: Fecal transplant from myostatin deletion pigs positively impacts the gut-muscle axis
Source: eLife journal article supplement (doi:10.7554/elife.81858), 2023-04-11
Supplement: fig6-data1 [file Fig6.a.xlsx]

## Sheet: fig6.a1
Myotube diameter (μm)
Control	9.34572
	11.9717
	12.1881
Isobutyric acid	14.8913
	12.6224
	12.7532
Valeric acid	22.3147
	20.9052
	16.9254
Control	11.1685
Isobutyric acid	13.4223
Valeric acid	20.0484
SE	0.913524
SE	0.735478
SE	1.61364
Ttest	0.127014
	0.00871866

## Sheet: fig6.a2
Fusion index (%)
Control	17.148
	20.9156
	18.7747
	22.318
Isobutyric acid	29.8343
	27.003
	29.1667
	30.9836
Valeric acid	33.764
	39.6667
	33.764
	40.0673
Control	19.7891
Isobutyric acid	29.2469
Valeric acid	36.8155
SE	1.14269
SE	0.8368
SE	1.76368
Ttest	0.000546249
	0.000189636
