# Supplementary material for: Fecal transplant from myostatin deletion pigs positively impacts the gut-muscle axis
Source: eLife journal article supplement (doi:10.7554/elife.81858), 2023-04-11
Supplement: fig6-data1 [file fig6.b.xlsx]

## Sheet: fig6.b
	MyoD				MyoG				actin
Con	1	13588	1	14218.3	1	15527	1	16015.4	1	22628.4		1	15805.7
	2	15317.5	2	15953.1	2	14424.4	2	15279.3	2	21461.9		2	14783.5
Ios	3	13936.7	3	14307.5	3	12015.4	3	12917.4	3	20267.6		3	12349.4
	4	15012.7	4	15568.7	4	12754.2	4	13737	4	19622.8		4	13096
Val	5	23095.6	5	23887.4	5	20275	5	21432.4	5	23606.1		5	20710
	6	23493.3	6	23815.1	6	25052.7	6	25102.4	6	24185.6		6	24927.1
	Con	0.600484	0.628338		Con	0.686173	0.707757
		0.713707	0.74332			0.672092	0.711928
	Ios	0.687635	0.705932		Ios	0.592839	0.637344
		0.765063	0.793397			0.649968	0.700054
	Val	0.978376	1.01192		Val	0.858888	0.907918
		0.971376	0.984682			1.03585	1.03791
			MyoD	Relative	Ttest		MyoG	Relative	Ttest
	Con	0.600484		0.894293		0.686173		0.988028
		0.713707		1.06292		0.672092		0.967753
		0.628338		0.935776		0.707757		1.01911
		0.74332	0.671462	1.10702		0.711928	0.694487	1.02511
	Ios	0.687635		1.02409		0.592839		0.853636
		0.765063		1.1394		0.649968		0.935896
		0.705932		1.05134		0.637344		0.917719
		0.793397		1.1816	0.164566	0.700054		1.00802	0.0846165
	Val	0.978376		1.45708		0.858888		1.23672
		0.971376		1.44666		1.03585		1.49154
		1.01192		1.50704		0.907918		1.30732
		0.984682		1.46648	0.000106854	1.03791		1.4945	0.00122851
