# Supplementary material for: Fecal transplant from myostatin deletion pigs positively impacts the gut-muscle axis
Source: eLife journal article supplement (doi:10.7554/elife.81858), 2023-04-11
Supplement: fig6-data1 [file fig6.c.xlsx]

## Sheet: fig6.c
	p-AKT			AKT			p-mTOR			mTOR			actin
Con	1	17914.6	0.860203	1	19609.7	0.941597	1	16289	0.782147	1	23549.2	1.13076	1	20826
	2	12464.6	0.508687	2	19469.1	0.79454	2	16084.8	0.656427	2	24685	1.00741	2	24503.5
Ios	3	15088.6	0.733806	3	20148.3	0.979872	3	13418.1	0.652561	3	21291	1.03545	3	20562.2
	4	15986.9	0.761553	4	23122.1	1.10145	4	12334.9	0.587589	4	22694.4	1.08107	4	20992.5
Val	5	24630.2	1.10508	5	26288.3	1.17948	5	23622.2	1.05986	5	23916	1.07304	5	22288.1
	6	28005.1	1.42653	6	22996.3	1.17139	6	25067	1.27686	6	24363.7	1.24104	6	19631.6
Con	1	17618.9	0.846004	1	20109.1	0.965578	1	16923	0.81259	1	23356.5	1.12151
	2	12374.2	0.504997	2	20043.8	0.817995	2	16970.2	0.692561	2	25009.7	1.02066
Ios	3	14990.8	0.729045	3	20722.4	1.00779	3	14348.8	0.697824	3	21758.8	1.0582
	4	15825.6	0.75387	4	23713.9	1.12964	4	12922.1	0.615557	4	23212.4	1.10575
Val	5	24648.4	1.1059	5	26531.4	1.19038	5	24191.5	1.0854	5	24498.4	1.09917
	6	28169.9	1.43492	6	23077.8	1.17554	6	25670.2	1.3076	6	25047.8	1.27589
Con	0.913557	0.876164					Con	0.6917	0.724553
	0.640228	0.61736						0.651601	0.678546
Ios	0.748879	0.723408					Ios	0.630223	0.659446
	0.691413	0.667355						0.543523	0.556687
Val	0.936928	0.929026					Val	0.987719	0.987476
	1.21781	1.22065						1.02886	1.02485
		p-akt/akt	Relative	Ttest					p-mTOR/mTOR	Relative	Ttest
Con	0.913557		1.19917				Con	0.6917		1.00743
	0.640228		0.840385					0.651601		0.949026
	0.876164		1.15008					0.724553		1.05528
	0.61736	0.761827	0.810368					0.678546	0.6866	0.988269
Ios	0.748879		0.983004				Ios	0.630223		0.917889
	0.691413		0.907572					0.543523		0.791615
	0.723408		0.94957					0.659446		0.960452
	0.667355		0.875993	0.521157				0.556687		0.810788	0.0315621
Val	0.936928		1.22984				Val	0.987719		1.43857
	1.21781		1.59854					1.02886		1.49849
	0.929026		1.21947					0.987476		1.43821
	1.22065		1.60227	0.0321375				1.02485		1.49264	2.7179e-06
