# Supplementary material for: Fecal transplant from myostatin deletion pigs positively impacts the gut-muscle axis
Source: eLife journal article supplement (doi:10.7554/elife.81858), 2023-04-11

Figure 6B source data

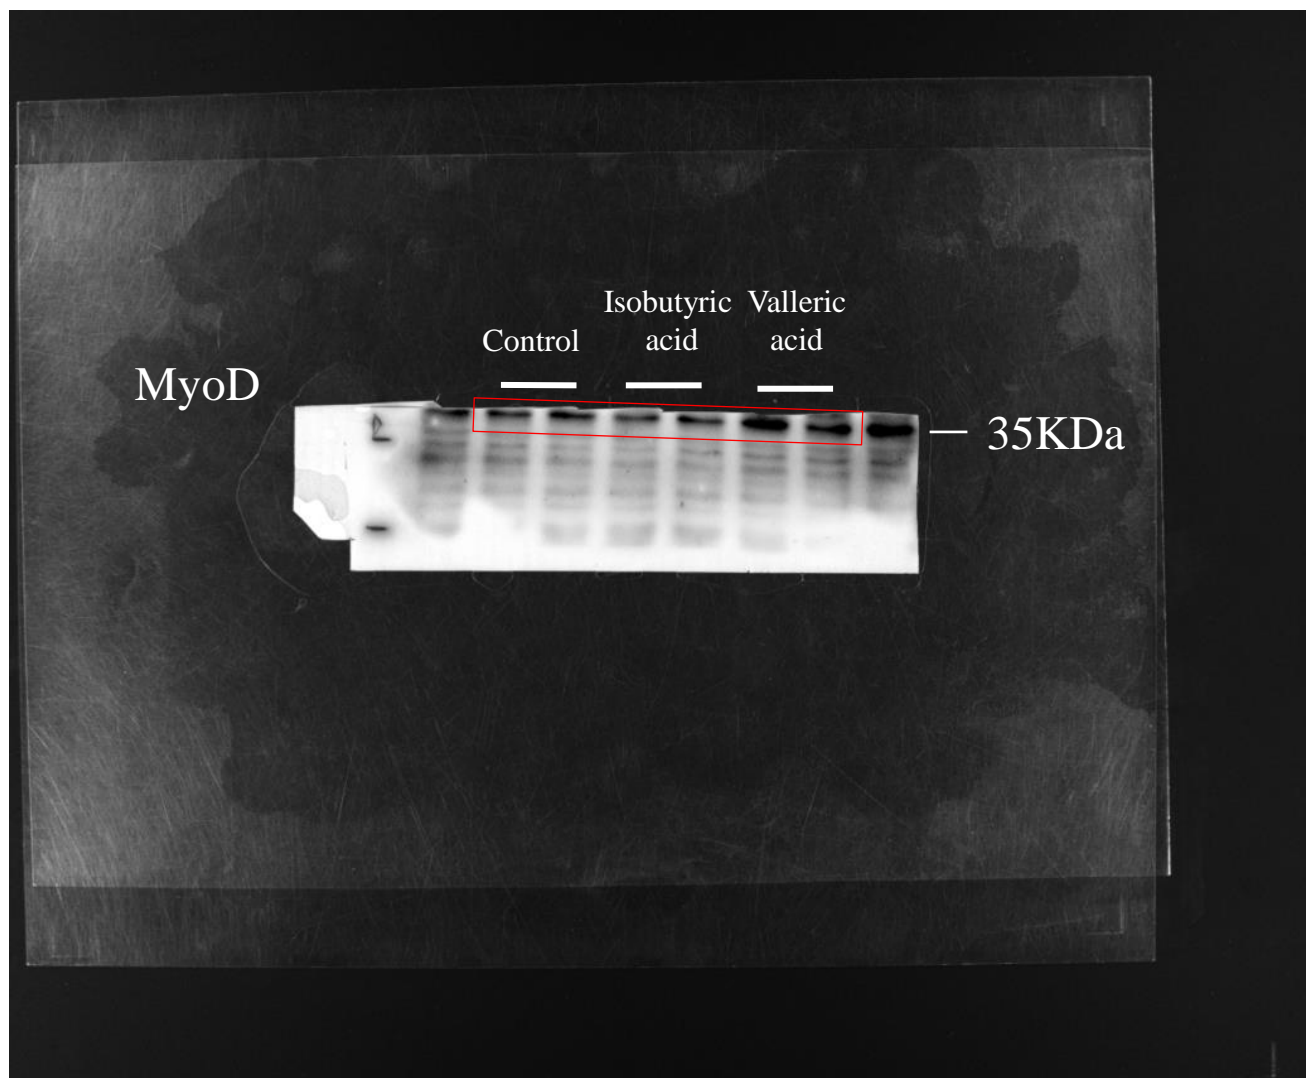

## Figure 6B source data

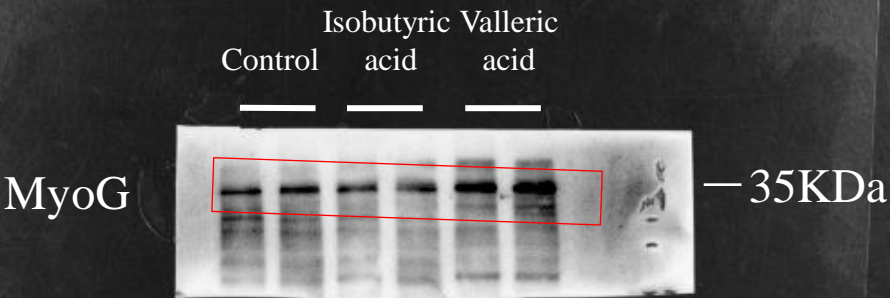

Figure 6B source data

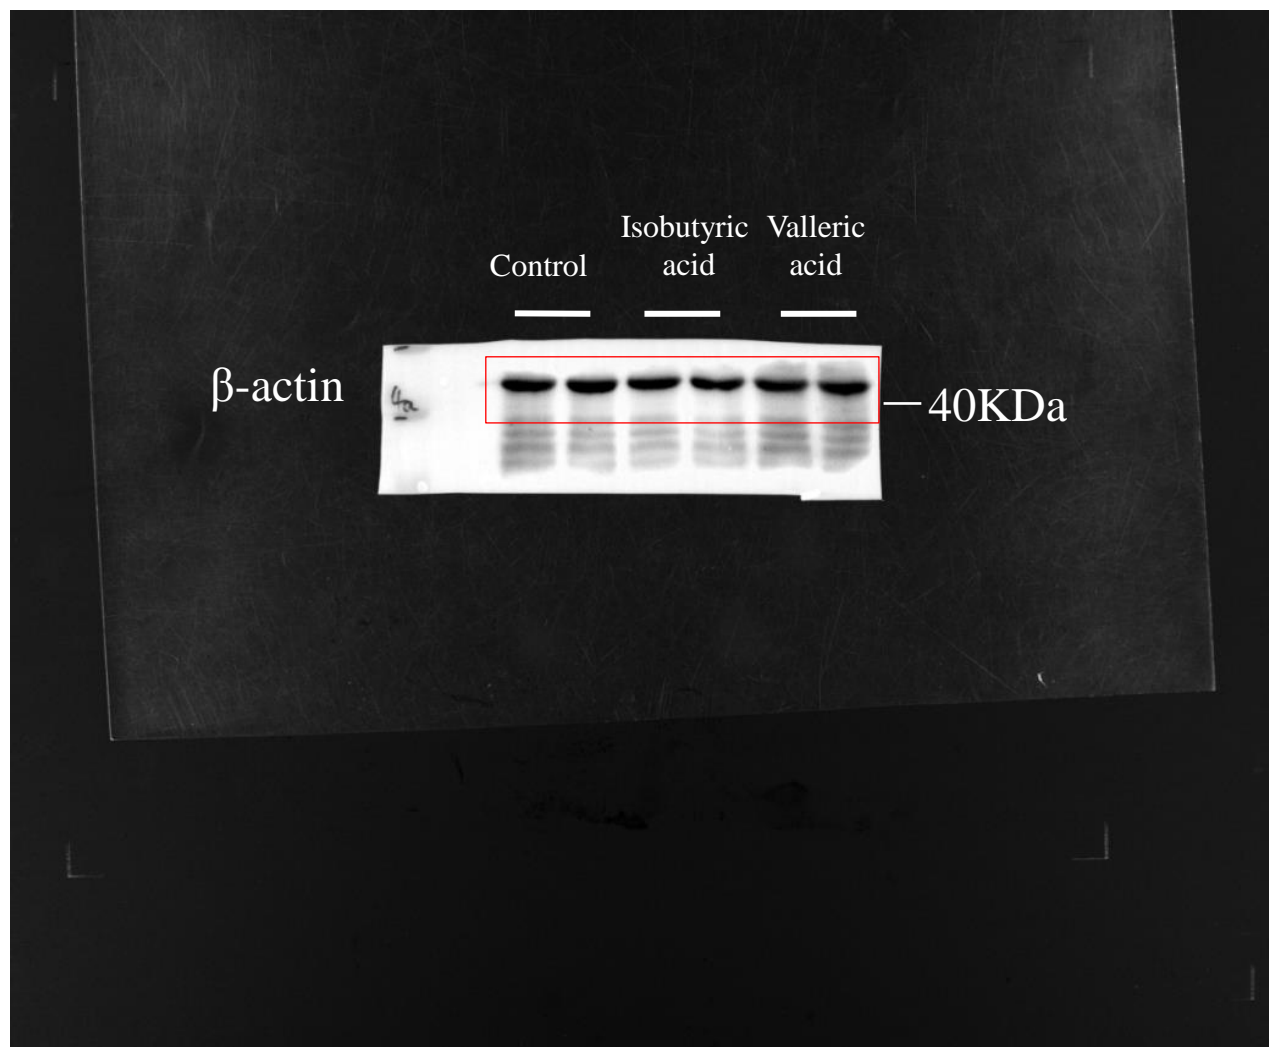

Figure 6C source data

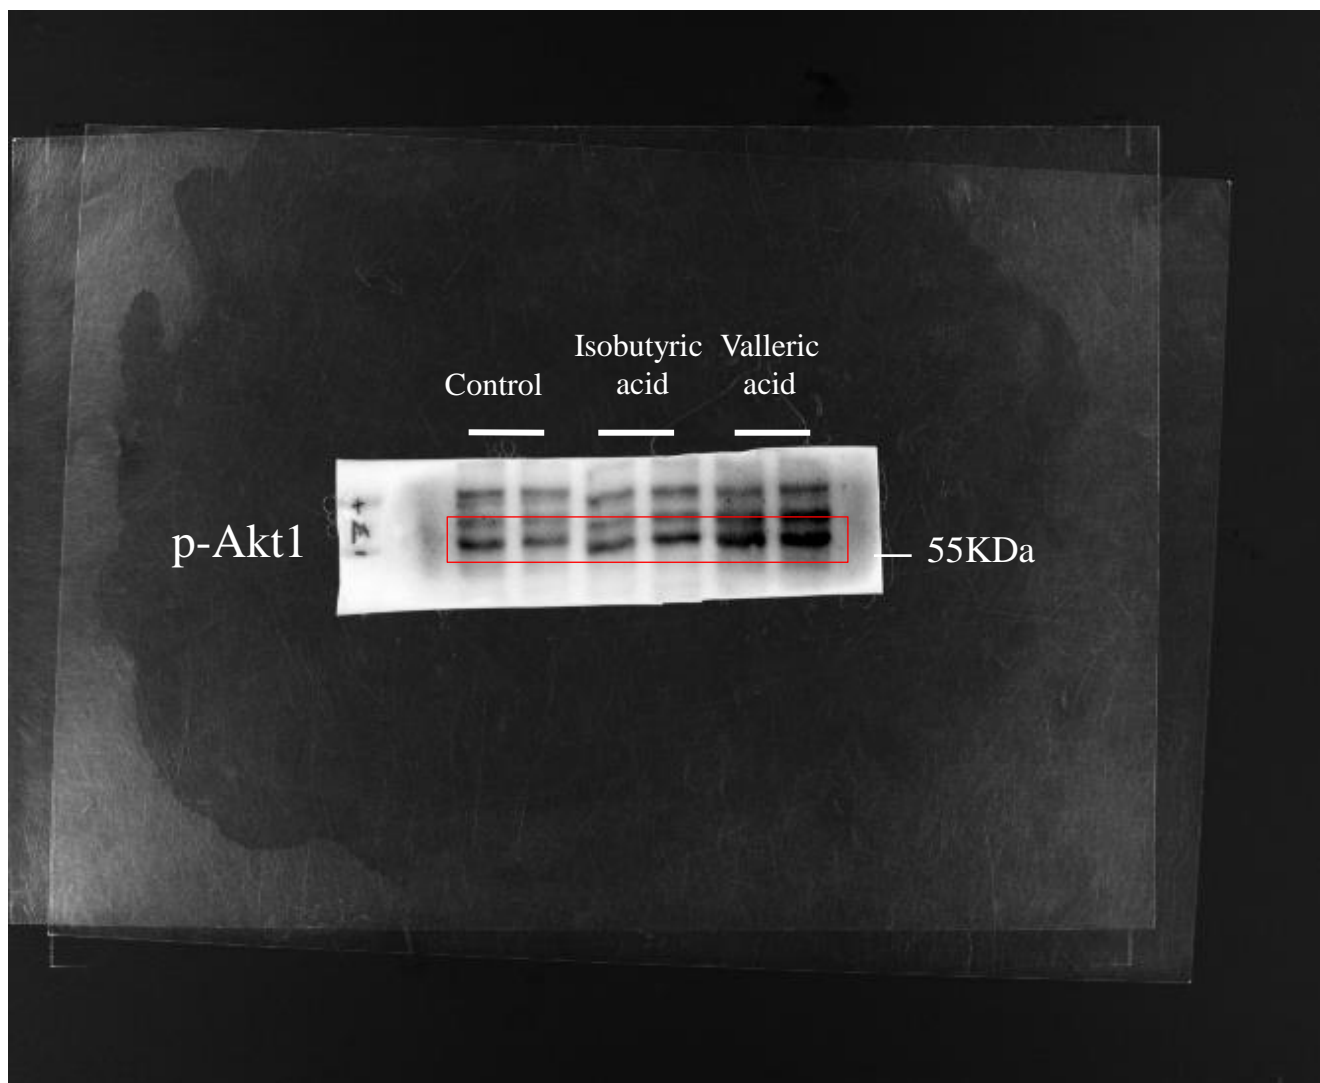

Figure 6C source data

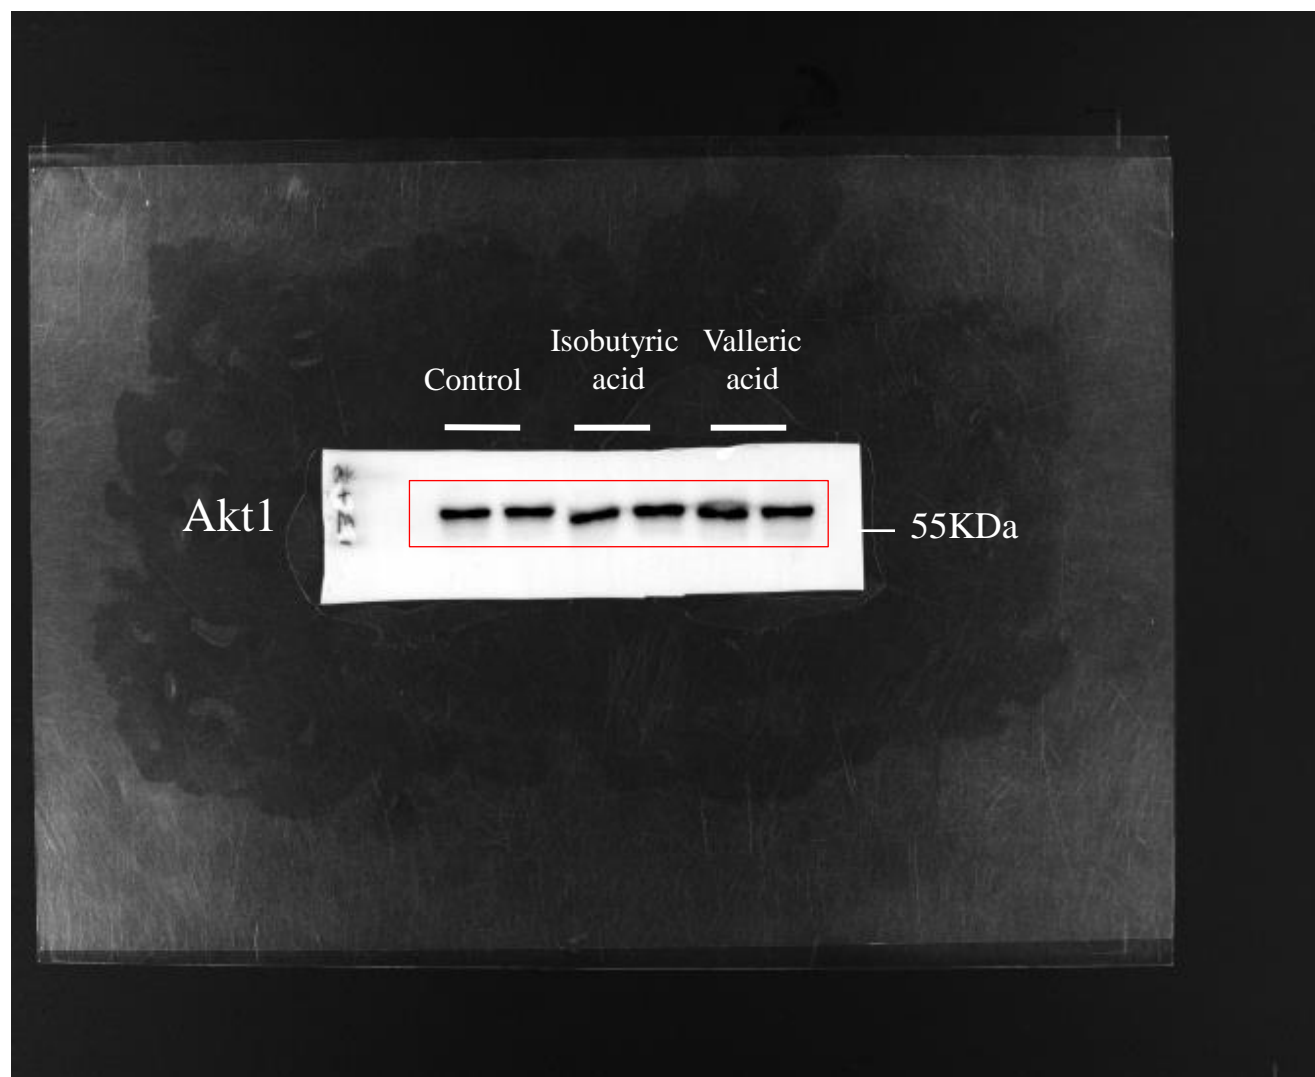

Figure 6C source data

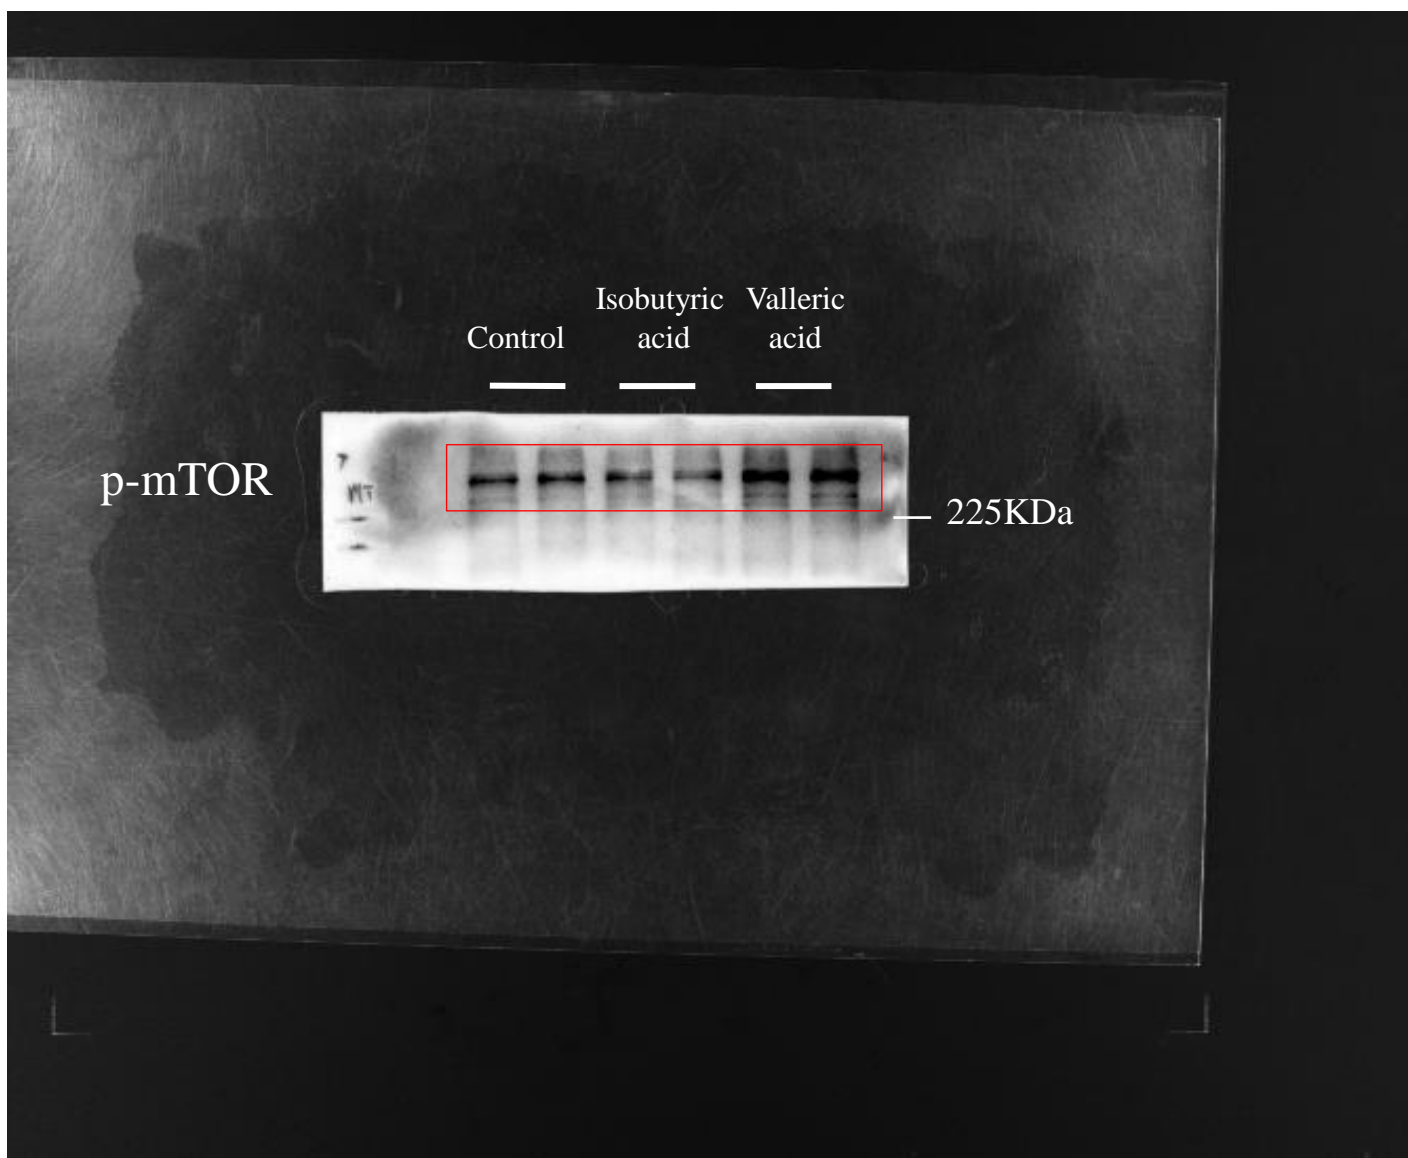

Figure 6C source data

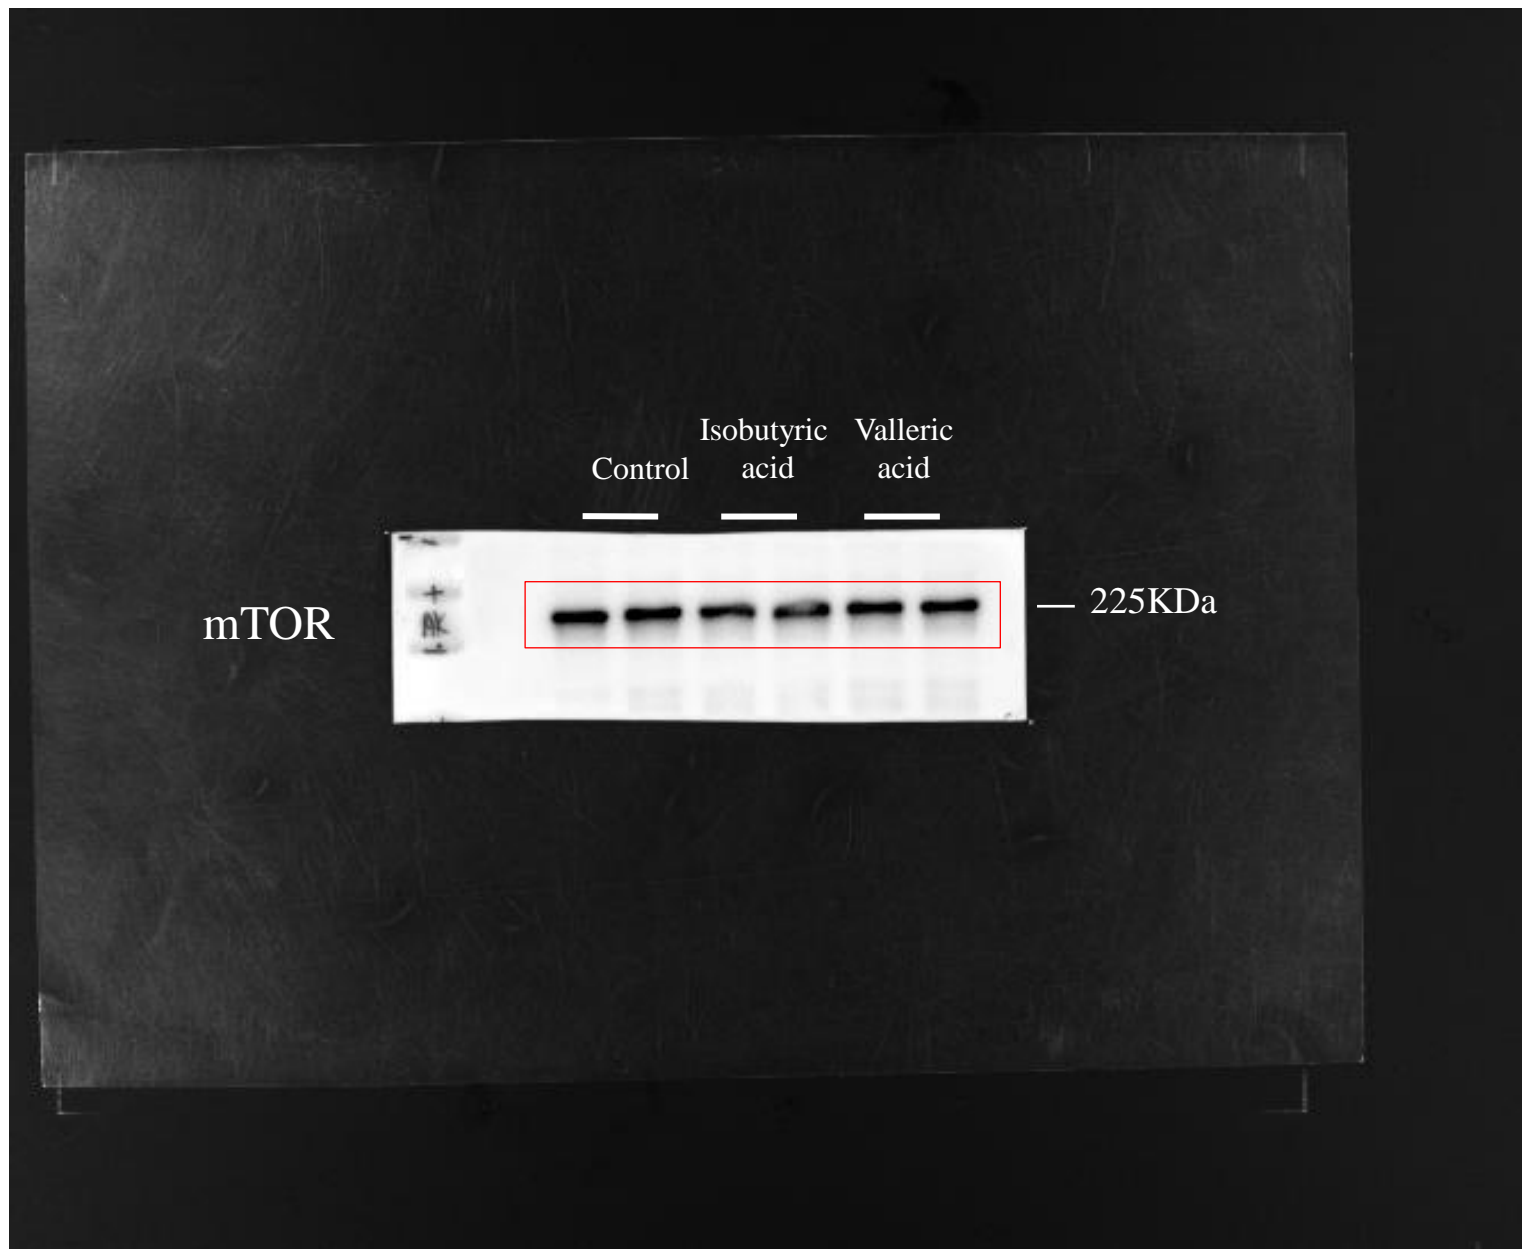

Figure 6C source data

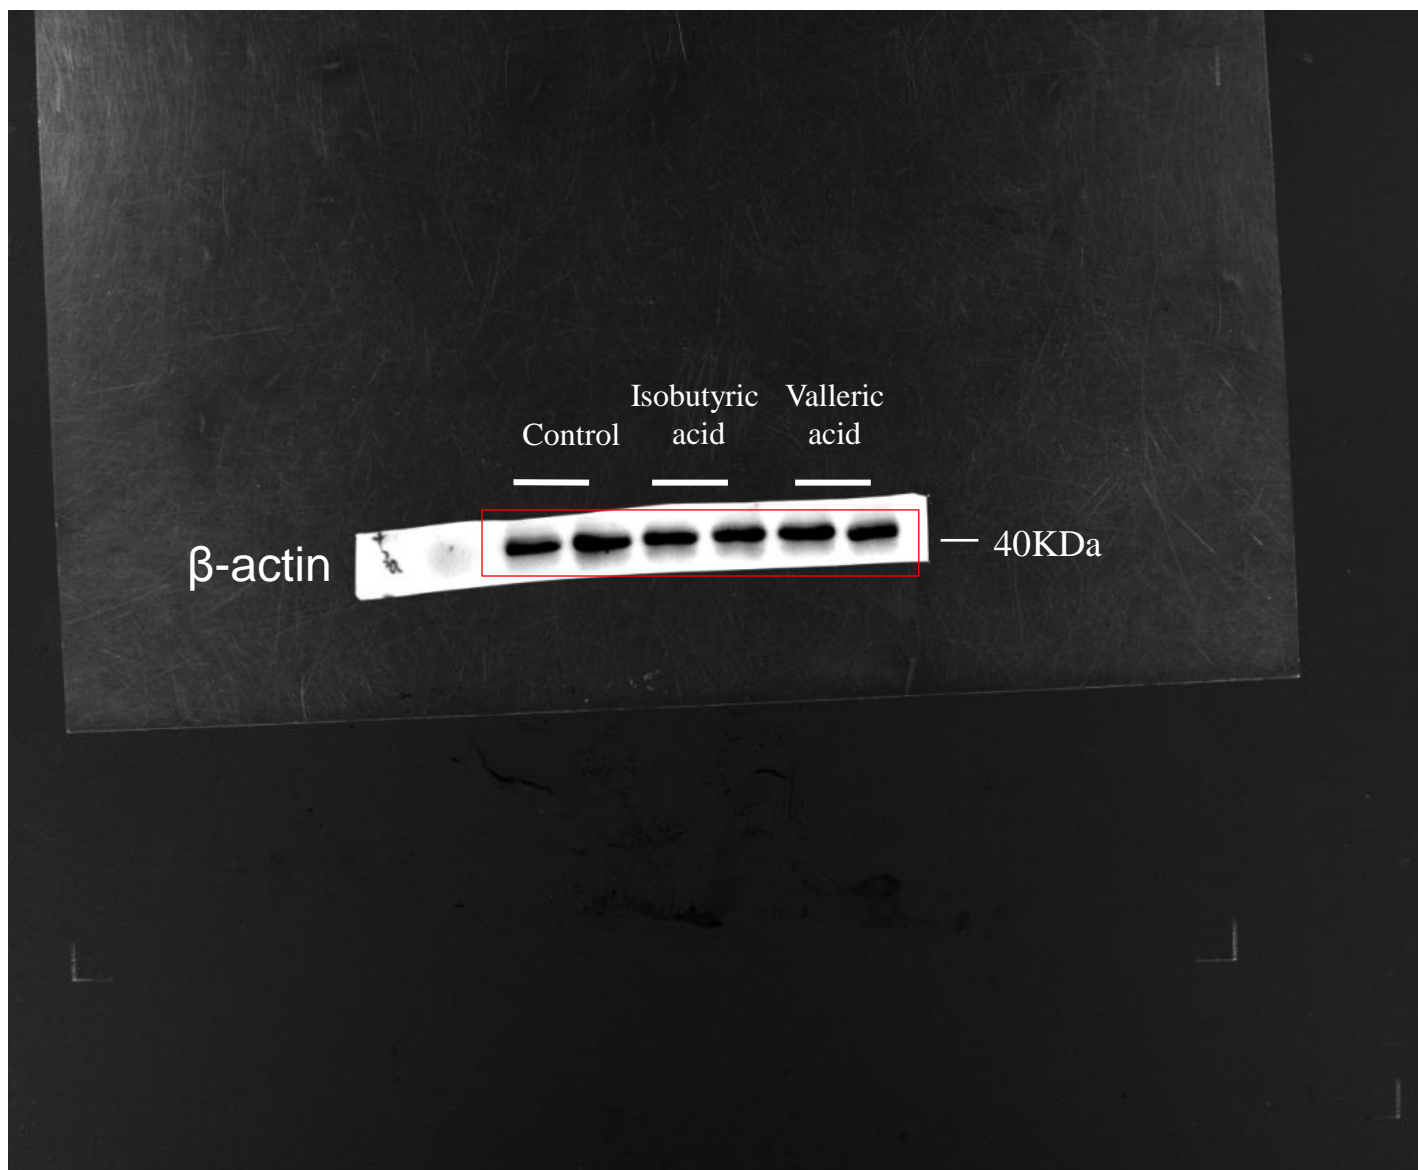

Supplement: fig6-data2 [file Raw western blot images for Figure 6.pdf › Figure 6-source data 2/Raw western blot images for Figure 6.pdf]
