# Supplementary material for: Fecal transplant from myostatin deletion pigs positively impacts the gut-muscle axis
Source: eLife journal article supplement (doi:10.7554/elife.81858), 2023-04-11
Supplement: fig7-data1 [file fig7.b.xlsx]

## Sheet: fig7.b
Gastrocnemius	耳号
Control	505	300
	518	237.3
	510	266.7
	514	265.4
	511	278.5
	508	277.5
	512	234.7
	513	234.4
	517	283.7
Valeric acid	506	311.9
	503	291.5
	502	287.7
	507	266.2
	519	280.3
	515	287.8
	520	312.3
	509	274.8
	501	284.8
Control	average	264.244
Valeric acid	average	288.589
	Ttext	0.0202431
	SE	8.4158
	SE	5.78455
