# Supplementary material for: Fecal transplant from myostatin deletion pigs positively impacts the gut-muscle axis
Source: eLife journal article supplement (doi:10.7554/elife.81858), 2023-04-11
Supplement: fig7-data1 [file fig7.c.xlsx]

## Sheet: fig7.c1
	Con	Val	Ttest
Average	1451.3	2111.43	2.88227e-46
SE	27.7561	34.0416
	957.143	1791.99
	745.663	2589.14
	916.071	2677.14
	792.092	2962.59
	1079.59	1862.64
	755.102	1319.31
	1112.76	3410.01
	920.153	2454.45
	758.673	2176.66
	1059.18	1096.1
	1178.32	2626.38
	819.388	2903.41
	1033.42	2489.65
	1029.34	3015.65
	963.265	3084.52
	787.5	2437.11
	1154.59	2430.22
	548.214	719.081
	1315.05	1261.14
	788.265	2355.48
	983.929	852.747
	750	2527.92
	1145.15	2867.7
	895.408	3586.79
	730.612	1875.14
	1413.78	2733.52
	1120.15	1988.15
	1803.32	3140.64
	996.429	2114.93
	1678.57	3089.37
	815.561	3165.13
	988.01	1669.8
	1075	2272.57
	1002.81	3219.97
	1119.39	2993.45
	1021.17	2440.93
	708.418	3118.96
	841.327	3410.52
	774.49	2090.69
	938.265	2716.68
	745.663	3143.45
	1090.05	3379.4
	853.316	2691.17
	1341.84	1420.32
	1294.9	2903.15
	874.745	1500.67
	1701.79	3090.64
	1079.08	2566.44
	1110.71	2829.94
	1802.3	2430.47
	940.306	2113.4
	557.908	2865.4
	995.663	2665.15
	1437.76	2505.72
	1329.85	2204.21
	932.908	2954.43
	1608.93	2930.96
	1682.91	2670
	765.816	2641.18
	717.347	1924.89
	747.449	2578.93
	610.459	1472.61
	1051.02	2987.59
	686.224	2536.59
	718.112	-91.5923
	807.398	853.257
	914.541	2655.97
	1102.04	1561.13
	833.673	2614.65
	982.398	3099.32
	1040.82	2779.94
	591.582	2494.25
	1836.73	1291.5
	591.071	2291.19
	1738.52	2612.1
	781.122	2312.62
	552.041	1168.29
	630.102	2219.51
	907.398	1699.39
	925.255	750.967
	1027.3	2354.46
	1020.15	2907.49
	751.276	-137.508
	997.959	2824.08
	603.827	2688.62
	822.959	2927.13
	744.898	1905.5
	867.602	2929.17
	1150.77	3001.87
	1635.97	1757.29
	1725.26	2282.52
	990.051	1985.6
	1057.91	2499.6
	1195.15	1831.52
	1083.67	2590.16
	1033.16	1961.62
	1410.71	2154.72
	741.837	2471.03
	1614.29	1025.44
	856.888	2713.88
	1357.14	1116.25
	2402.82	2284.31
	1113.92	2072.84
	2525.3	1231.81
	1490.75	796.883
	1309.89	1937.39
	943.371	2784.03
	1501.62	915.499
	1794.84	509.908
	2562.67	2026.67
	2961.49	1848.36
	2636.51	3036.05
	975.16	2672.55
	2158.39	3120.74
	1179.12	2181
	906.108	2547.05
	1916.13	1463.18
	1088.2	3296.76
	2195.76	1368.79
	1026.66	2116.46
	876.937	2027.94
	1716.04	1758.57
	1056.97	509.142
	1019.83	2486.59
	1270.51	1445.06
	1708.3	2254.21
	3117.59	353.793
	2183.45	2645.26
	1969.01	1904.22
	1863.72	664.237
	844.576	1357.31
	904.512	1134.37
	984.275	2402.16
	953.054	694.592
	911.121	539.498
	2076.12	3603.12
	2108.93	1418.53
	1171.15	1953.71
	2283.27	1067.02
	2082.5	2699.08
	983.136	1181.56
	2705.33	2026.67
	2157.25	2463.63
	928.441	2607.25
	2274.38	2885.81
	1043.3	2850.35
	1094.12	1047.13
	1326.8	3431.95
	1808.11	1019.83
	3026.89	1259.36
	2265.04	1603.47
	2585.92	2774.59
	3186.42	578.782
	2673.66	3352.87
	2323.15	2010.09
	2278.94	3887.8
	1283.27	1658.32
	2740.66	3959.22
	1574.52	575.721
	2860.76	4193.65
	1997.95	2081.77
	2810.85	1301.19
	1092.75	2915.65
	1827.26	1020.09
	1186.87	1012.43
	2905.88	905.551
	2956.47	2650.61
	2567	4491.59
	1717.64	2684.29
	2264.13	2359.05
	1962.4	4189.06
	503.191	2463.63
	2497.72	3318.44
	2257.06	1777.45
	1787.15	1665.46
	896.764	2322.32
	720.146	1687.14
	705.789	985.394
	480.629	2503.94
	541.477	2608.27
	2435.51	3245.74
	2190.52	2147.32
	944.394	2654.19
	2760.94	3142.43
	808.797	1835.1
	1977.21	735.406
	606.882	2671.79
	1583.64	4297.72
	1574.75	616.79
	696.445	2891.67
	2680.72	2108.81
	1004.1	3111.31
	490.884	2540.67
	1080.22	1012.69
	803.783	1807.04
	2865.31	1095.08
	828.396	1387.92
	1045.35	2885.3
	698.952	1269.31
	952.598	3516.39
	2217.18	2199.36
	2261.85	1432.56
	701.459	1608.42
	2066.03	1259.95
	2154.45	2060.46
	2081.9	1194.9
	1327.32	185.204
	969.527	1494.9
	1422.55	640.051
	821.241	616.327
	2151.73	3939.29
	1525.49	2473.72
	1359.06	1231.63
	1478.78	1257.14
	891.529	1984.95
	865.681	2027.81
	2084.16	699.745
	1648.83	832.653
	1135.95	2171.43
	2846	456.378
	1340.92	2872.7
	1671.5	806.378
	1455.2	1836.48
	2485.49	1531.63
	1497.37	2231.38
	1220.75	1398.72
	1817.98	3426.53
	3142.12	410.204
	2322.69	2089.8
	1327.77	3050.26
	1985.76	3333.93
	1509.16	674.49
	3172.95	2402.04
	2118.18	1811.22
	1765.83	1266.58
	998.549	3004.59
	1197.17	751.786
	1349.08	2759.69
	2157.63	2393.88
	2153.55	607.653
	2234.26	2354.34
	1589.42	1586.48
	1119.63	3671.43
	2106.38	1100
	783.149	3352.81
	1554.05	3558.42
	1581.72	2255.36
	901.506	3144.39
	2759.84	3113.52
	945.492	2578.32
	2158.99	2780.36
	784.056	1550
	2284.15	3475.77
	1413.02	3177.81
	1167.24	3615.31
	1582.17	986.735
	2624.71	3333.16
	806.276	1971.43
	2552.6	3856.38
	833.938	469.388
	1927.26	936.48
	2435.15	1931.63
	161.89	1794.39
	1821.6	872.194
	1919.1	2190.56
	787.23	2236.99
	1170.42	1738.01
	1337.29	846.939
	1872.85	454.592
	1501	2720.15
	478.415	1740.82
	2099.13	824.235
	1030.29	2405.1
	529.204	2506.63
	2562.58	1450.77
	1928.62	726.02
	1830.22	2048.21
	1736.35	1804.34
	889.262	1377.55
	2276.89	1760.2
	1932.7	822.194
	1929.53	2824.74
	840.74	1143.88
	950.481	2049.74
	2038.36	2003.06
	2406.13	1795.92
	2761.2	1672.96
	1084.71	773.469
	2124.98	1929.08
	1141.39	1566.84
	1666.97	542.092
	1697.81	3149.23
	869.762	835.459
	2475.06	2706.38
	909.668	2757.14
	1970.34	1459.44
	2146.74	3086.73
	1123.25	1557.14
	3303.56	3127.55
	1195.81	1958.67
	628.968	2130.1
	2505.9	2833.16
	2220.66	3404.85
	1671.96	1594.64
	1923.08	1993.63
	1311.13	2586.83
	1826.18	2332.25
	1527.05	1995.1
	523.646	2477.18
	534.248	1850.66
	1768.88	2136.23
	1867.25	2594.3
	1279.73	2113.69
	1541.15	2225.42
	478.421	1347.02
	1957.3	2185.36
	1714.26	1993.26
	1549.6	2449.25
	1966.02	2648.57
	1314.35	1664.57
	1436.07	2484.53
	715.148	2380.64
	1582.21	2603.36
	1707.55	2328.33
	524.854	2300.4
	1485.05	2613.41
	1135.06	1373.98
	1459.28	2156.45
	1108.62	1988
	867.331	2078.04
	1589.86	2621.86
	1499.54	1363.32
	1220.27	1866.71
	989.184	2509.77
	1246.98	1081.18
	1510.01	2884.16
	1058.43	1984.69
	1574.83	1653.79
	934.564	2343.52
	2357.61	2035.04
	1899.32	2310.08
	569.542	2484.65
	484.862	1828.73
	953.889	2578.49
	2223.82	1778.99
	999.919	1777.89
	2003.86	2823.39
	1995.54	1071.99
	1717.35	2043
	1697.76	2107.44
	710.049	2449.49
	1810.22	2262.17
	1768.75	2293.29
	1474.05	1531.52
	1497.26	2111.98
	1790.62	2224.93
	704.412	2163.92
	1632.67	2215.13
	681.196	2373.66
	1903.62	1484.85
	1667.83	1934.83
	1351.52	1430.58
	1895.57	1827.51
	1256.24	2336.05
	1132.37	2024.75
	1398.89	2178.38
	806.27	1459.12
	871.759	1325.34
	1733.99	1899.79
	2386.2	2533.41
	1932.47	2158.41
	673.278	1960.31
	2201.41	2286.92
	2090.29	2514.79
	984.084	1804.84
	2451.42	2620.15
	2123.17	2530.84
	2007.76	2390.93
	1671.59	2395.59
	2456.65	2059.79
	2018.36	2751.6
	1280.93	2658.13
	596.65	2060.64
	999.785	1574.89
	1523.16	2632.64
	853.24	1639.82
	1932.2	2524.96
	1580.33	2528.76
	1358.37	1633.58
	576.789	3002.87
	842.369	2766.55
	1912.61	2336.66
	810.833	2936.84
	1487.6	2398.65
	1656.69	2686.18
	1891.54	2921.03
	1815.72	2608.75
	1673.06	2884.28
	1447.74	2101.81
	1551.08	1916.57
	2160.88	2967.59
	1554.43	2667.8
	2341.24	2783.45
	703.205	3201.58
	1894.49	2661.07
	1968.17	2450.96
	2490.3	2103.03
	1973.39	2619.78
	1095.22	2191
	2370.24	1265.75
	723.877	933.949
	1465.1	1141.02
	1915.63	1975.04
	1323.98	1762.34
	1256.59	1920.77
	1144.44	1946.62
	1319.8	541.012
	968.984	856.881
	2118.87	1842.96
	615.991	1282.04
	1028.47	1933.39
	1169.14	1696.91
	2479.22	1533.95
	1085.41	1836.47
	595.557	2048.68
	2166.55	2802.58
	2365.16	1592.15
	1874.58	1919.17
	907.322	1145.79
	1065.34	2022.22
	1031.46	1672.16
	2026.78	2508.52
	1624.66	1563.36
	474.684	1739.06
	1802.2	2243.99
	723.423	1915.37
	1953.22	2252.56
	1481.36	1899.94
	1987.55	1569.73
	1419.33	2180.76
	718.974	2801.48
	968.53	2114.48
	786.721	1829.61
	743.312	2093.28
	1598.05	2218.75
	1094.58	2110.43
	1791.58	2183.34
	2118.69	2503.98
	1158.97	1134.52
	1802.11	2376.68
	1076.42	2380.23
	2041.31	2306.47
	1079.05	2254.4
	1445.48	2004.33
	1234.25	1198.97
	2619.71	2518.93
	1155.61	1056.96
	1008.31	2340.9
	1736.45	2358.55
	1082.41	2599.8
	682.376	1414.37
	2404.21	2419.69
	1432.68	2067.92
	2224.94	1755.72
	501.747	1825.44
	1297.55	1778.27
	1685.14	2330.49
	1978.47	2536.45
	1358.48	2330.73
	1900.01	2467.59
	1637.19	2190.32
	1319.34	3040.15
	1367.48	2606.17
	1204.65	2314.07
	2425.64	2363.08
	1217	2757.24
	1882.48	2297.77
	1528.22	2278.78
	915.767	2308.43
	1390.27	2609.6
	1761.79	887.757
	516.459	1256.8
	2629.15	2631.04
	1204.28	2431.94
	1441.94	1236.71
	723.787	2793.02
	1876.76	1587.25
	748.034	1838.43
	1899.74	3007.44
	2077.28	2079.07
	1142.35	2048.93
	1996.54	2453.5
	2216.04	2697.45
	8.26406	2313.83
	1276.03	2299
	404.939	2491.24
	1208.37	1846.52
	2127.41	1019.47
	1352.95	1829.97
	1936.52	2324.61
	1830.72	1373.32
	618.987	2705.17
	1082.77	2085.07
	1850.88	683.386
	1454.2	1801.3
	1038.64	2176.72
	1579.89	2461.59
	625.798	2038.63
	1737.45	1557.72
	549.333	2578.85
	1800.2	2227.81

## Sheet: fig7.c2
	Con1		Con2		Con3		Con4		Con5			Val1		Val2		Val3		Val4		Val5
Average	1684.05		1620.96		1322.84		1450.09		1490.1			2242.24		2341.58		2312.92		2587.76		2101.95
	480.173	µm	478.415	µm	441.734	µm	355.9	µm	390.386	µm		485.204	µm	841.012	µm	596.155	µm	392.492	µm	579.817	µm
	480.629	µm	508.344	µm	457.578	µm	404.939	µm	440.711	µm		710.204	µm	891.492	µm	901.882	µm	508.408	µm	653.793	µm
	490.884	µm	519.227	µm	493.433	µm	419.106	µm	478.421	µm		754.592	µm	983.386	µm	1041.61	µm	1019.08	µm	684.659	µm
	503.191	µm	529.204	µm	500.73	µm	474.684	µm	484.862	µm		756.378	µm	1156.88	µm	1152.79	µm	1050.97	µm	809.142	µm
	541.477	µm	543.715	µm	506.671	µm	501.747	µm	523.646	µm		769.388	µm	1187.76	µm	1163.75	µm	1152.75	µm	809.908	µm
	606.882	µm	624.887	µm	518.032	µm	516.459	µm	524.854	µm		842.092	µm	1233.95	µm	1212.2	µm	1153.26	µm	819.601	µm
	634.458	µm	628.968	µm	524.807	µm	520.545	µm	534.248	µm		907.653	µm	1319.47	µm	1215.77	µm	1325.44	µm	839.498	µm
	634.686	µm	671.141	µm	529.289	µm	522.634	µm	569.542	µm		916.327	µm	1356.96	µm	1217.3	µm	1396.1	µm	875.721	µm
	657.931	µm	735.081	µm	533.354	µm	549.333	µm	576.789	µm		940.051	µm	1434.52	µm	1273.39	µm	1468.29	µm	878.782	µm
	696.445	µm	741.429	µm	545.862	µm	551.513	µm	586.72	µm		974.49	µm	1441.02	µm	1273.65	µm	1561.14	µm	881.843	µm
	698.952	µm	748.231	µm	549.614	µm	557.87	µm	596.65	µm		999.745	µm	1444.69	µm	1320.57	µm	1591.5	µm	916.79	µm
	701.459	µm	783.149	µm	552.741	µm	575.124	µm	625.369	µm		1026.02	µm	1445.79	µm	1320.82	µm	1619.31	µm	941.534	µm
	705.789	µm	784.056	µm	553.575	µm	587.021	µm	668.313	µm		1051.79	µm	1469.56	µm	1407.52	µm	1720.32	µm	964.237	µm
	720.146	µm	787.23	µm	565.562	µm	595.557	µm	673.278	µm		1073.47	µm	1498.97	µm	1430.98	µm	1743.79	µm	994.592	µm
	738.605	µm	797.66	µm	575.777	µm	597.374	µm	681.196	µm		1106.38	µm	1536.71	µm	1487.58	µm	1772.61	µm	1035.41	µm
	778.031	µm	806.276	µm	576.923	µm	615.991	µm	701.326	µm		1122.19	µm	1556.8	µm	1498.29	µm	1800.67	µm	1096.88	µm
	794.439	µm	821.241	µm	579.008	µm	618.987	µm	703.205	µm		1124.23	µm	1565.75	µm	1513.85	µm	1861.13	µm	1099.69	µm
	803.783	µm	833.938	µm	594.538	µm	625.798	µm	704.412	µm		1132.65	µm	1582.04	µm	1519.2	µm	1969.8	µm	1110.91	µm
	808.797	µm	840.74	µm	596.102	µm	682.376	µm	710.049	µm		1135.46	µm	1673.32	µm	1574.79	µm	1999.39	µm	1191.78	µm
	828.396	µm	840.74	µm	596.102	µm	698.54	µm	715.148	µm		1146.94	µm	1714.37	µm	1609.98	µm	2057.29	µm	1205.55	µm
	835.916	µm	842.554	µm	600.896	µm	702.718	µm	766.815	µm		1156.12	µm	1833.95	µm	1620.68	µm	2091.99	µm	1215.5	µm
	844.576	µm	847.996	µm	613.508	µm	718.974	µm	770.304	µm		1172.19	µm	1857.72	µm	1624	µm	2131.52	µm	1285.39	µm
	876.937	µm	862.96	µm	622.264	µm	723.423	µm	773.659	µm		1236.48	µm	1862.38	µm	1663.78	µm	2162.64	µm	1312.43	µm
	895.624	µm	865.681	µm	623.098	µm	723.787	µm	806.27	µm		1286.73	µm	1863.36	µm	1667.09	µm	2175.14	µm	1312.69	µm
	896.764	µm	869.762	µm	625.182	µm	723.877	µm	810.833	µm		1302.04	µm	1869.73	µm	1726.76	µm	2205.5	µm	1319.83	µm
	904.512	µm	881.553	µm	630.081	µm	738.498	µm	837.404	µm		1400	µm	1887.25	µm	1776.74	µm	2224.89	µm	1320.09	µm
	906.108	µm	885.634	µm	631.645	µm	743.312	µm	842.369	µm		1443.88	µm	1892.15	µm	1809.63	µm	2242.74	µm	1347.13	µm
	911.121	µm	889.262	µm	640.504	µm	748.034	µm	845.322	µm		1445.15	µm	1972.16	µm	1809.63	µm	2261.62	µm	1367.02	µm
	912.489	µm	891.529	µm	642.068	µm	786.721	µm	846.798	µm		1494.9	µm	1986.62	µm	1873.37	µm	2285.6	µm	1395.08	µm
	918.186	µm	901.506	µm	648.426	µm	804.157	µm	853.24	µm		1520.41	µm	1996.91	µm	1877.2	µm	2288.15	µm	1416.25	µm
	928.213	µm	909.668	µm	652.804	µm	805.247	µm	860.352	µm		1531.63	µm	2039.06	µm	1943.5	µm	2390.69	µm	1434.37	µm
	928.441	µm	945.492	µm	655.827	µm	855.467	µm	863.439	µm		1557.14	µm	2055.72	µm	1977.41	µm	2413.4	µm	1444.82	µm
	933.227	µm	950.481	µm	658.641	µm	877.898	µm	867.331	µm		1559.95	µm	2062.34	µm	1979.7	µm	2414.93	µm	1481.56	µm
	943.371	µm	953.202	µm	676.673	µm	907.322	µm	871.759	µm		1566.58	µm	2078.27	µm	2006.73	µm	2454.72	µm	1531.81	µm
	944.394	µm	958.643	µm	679.07	µm	915.131	µm	871.893	µm		1677.55	µm	2101.3	µm	2032.23	µm	2459.57	µm	1559.36	µm
	952.598	µm	969.527	µm	686.262	µm	915.767	µm	893.097	µm		1698.72	µm	2125.44	µm	2040.13	µm	2476.66	µm	1569.31	µm
	953.054	µm	988.572	µm	719.095	µm	928.844	µm	902.357	µm		1744.9	µm	2129.61	µm	2043.96	µm	2489.16	µm	1601.19	µm
	975.16	µm	998.549	µm	724.098	µm	936.745	µm	912.019	µm		1750.77	µm	2129.97	µm	2056.96	µm	2504.21	µm	1657.31	µm
	983.136	µm	1021.68	µm	750.782	µm	957.723	µm	914.032	µm		1759.44	µm	2136.47	µm	2096.49	µm	2516.71	µm	1668.79	µm
	984.275	µm	1030.29	µm	751.511	µm	966.441	µm	919.131	µm		1794.9	µm	2138.43	µm	2110.51	µm	2519.51	µm	1687.92	µm
	1004.1	µm	1062.49	µm	759.12	µm	968.53	µm	934.564	µm		1831.63	µm	2142.96	µm	2116.63	µm	2572.57	µm	1702.97	µm
	1010.94	µm	1062.94	µm	761.309	µm	968.984	µm	941.811	µm		1850	µm	2146.52	µm	2138.56	µm	2582.52	µm	1706.8	µm
	1013.45	µm	1084.71	µm	772.045	µm	1008.31	µm	953.889	µm		1857.14	µm	2163.3	µm	2156.66	µm	2591.19	µm	1718.53	µm
	1019.83	µm	1085.16	µm	778.403	µm	1015.03	µm	961.807	µm		1866.84	µm	2166.24	µm	2159.21	µm	2612.62	µm	1732.56	µm
	1026.66	µm	1105.12	µm	780.488	µm	1028.47	µm	984.084	µm		1886.48	µm	2199.94	µm	2171.71	µm	2624.36	µm	1745.06	µm
	1035.1	µm	1119.63	µm	806.546	µm	1031.46	µm	989.184	µm		1889.54	µm	2215.37	µm	2180.12	µm	2654.46	µm	1763.18	µm
	1042.39	µm	1123.25	µm	806.754	µm	1032.19	µm	999.785	µm		1894.64	µm	2219.17	µm	2188.28	µm	2655.48	µm	1787.66	µm
	1043.3	µm	1135.95	µm	832.083	µm	1038.64	µm	999.919	µm		1903.57	µm	2220.77	µm	2202.31	µm	2669	µm	1821.08	µm
	1045.35	µm	1141.39	µm	834.897	µm	1041	µm	1030.92	µm		1908.42	µm	2233.39	µm	2228.31	µm	2718.48	µm	1903.47	µm
	1051.28	µm	1147.29	µm	839.691	µm	1043	µm	1058.43	µm		1972.96	µm	2246.62	µm	2246.93	µm	2730.22	µm	1949.62	µm
	1056.97	µm	1150.46	µm	846.571	µm	1057.89	µm	1092.38	µm		1993.37	µm	2275.04	µm	2247.95	µm	2730.47	µm	1958.32	µm
	1080.22	µm	1167.24	µm	853.763	µm	1065.34	µm	1105	µm		2038.01	µm	2304.33	µm	2267.84	µm	2737.11	µm	1965.46	µm
	1088.2	µm	1170.42	µm	857.515	µm	1065.43	µm	1108.62	µm		2040.82	µm	2322.22	µm	2269.88	µm	2740.93	µm	1982.65	µm
	1092.75	µm	1195.81	µm	858.766	µm	1072.42	µm	1132.37	µm		2050.26	µm	2338.63	µm	2290.27	µm	2754.45	µm	1987.14	µm
	1094.12	µm	1197.17	µm	869.919	µm	1076.42	µm	1135.06	µm		2060.2	µm	2348.68	µm	2314.24	µm	2771.03	µm	2058.57	µm
	1110.07	µm	1200.8	µm	871.065	µm	1079.05	µm	1141.63	µm		2094.39	µm	2348.93	µm	2332.86	µm	2789.65	µm	2077.45	µm
	1113.92	µm	1218.48	µm	874.401	µm	1082.41	µm	1158.95	µm		2095.92	µm	2367.92	µm	2333.11	µm	2794.25	µm	2086.88	µm
	1134.69	µm	1220.75	µm	884.928	µm	1082.77	µm	1220.27	µm		2104.34	µm	2379.07	µm	2348.41	µm	2799.6	µm	2107.04	µm
	1148.36	µm	1257.03	µm	886.179	µm	1083.59	µm	1224.17	µm		2111.22	µm	2385.07	µm	2375.44	µm	2805.72	µm	2135.1	µm
	1163.86	µm	1257.48	µm	910.673	µm	1085.41	µm	1225.91	µm		2126.28	µm	2393.28	µm	2381.05	µm	2827.92	µm	2148.36	µm
	1171.15	µm	1257.94	µm	933.813	µm	1094.58	µm	1232.89	µm		2136.48	µm	2406.51	µm	2387.17	µm	2832.25	µm	2204.22	µm
	1179.12	µm	1264.74	µm	958.099	µm	1095.22	µm	1246.98	µm		2178.83	µm	2410.43	µm	2390.23	µm	2836.59	µm	2237.39	µm
	1184.37	µm	1266.55	µm	959.662	µm	1114.29	µm	1249.4	µm		2209.69	µm	2414.48	µm	2421.85	µm	2866.44	µm	2253.71	µm
	1186.87	µm	1327.32	µm	963.206	µm	1123.82	µm	1256.24	µm		2229.08	µm	2447.31	µm	2470.55	µm	2878.93	µm	2273.61	µm
	1229.03	µm	1327.77	µm	968.314	µm	1125.27	µm	1264.43	µm		2231.63	µm	2476.72	µm	2476.92	µm	2889.14	µm	2310.09	µm
	1270.51	µm	1331.4	µm	973.108	µm	1142.35	µm	1272.08	µm		2258.67	µm	2480.76	µm	2486.61	µm	2890.16	µm	2326.67	µm
	1283.27	µm	1337.29	µm	983.948	µm	1144.44	µm	1273.69	µm		2271.43	µm	2483.34	µm	2508.29	µm	2912.1	µm	2326.67	µm
	1301.96	µm	1340.92	µm	991.349	µm	1149.61	µm	1279.73	µm		2284.95	µm	2490.32	µm	2515.17	µm	2914.65	µm	2327.94	µm
	1306.97	µm	1344.1	µm	1003.65	µm	1155.61	µm	1280.93	µm		2303.06	µm	2518.75	µm	2525.63	µm	2926.38	µm	2361.61	µm
	1309.89	µm	1349.08	µm	1004.69	µm	1158.97	µm	1303.75	µm		2327.81	µm	2527.81	µm	2539.91	µm	2931.23	µm	2372.84	µm
	1326.8	µm	1359.06	µm	1011.47	µm	1161.87	µm	1309.52	µm		2348.21	µm	2543.99	µm	2576.11	µm	2941.18	µm	2381.77	µm
	1485.19	µm	1366.77	µm	1012.09	µm	1169.14	µm	1311.13	µm		2349.74	µm	2552.56	µm	2578.15	µm	2955.97	µm	2408.81	µm
	1490.75	µm	1374.03	µm	1012.72	µm	1175.31	µm	1314.35	µm		2360.46	µm	2554.4	µm	2592.43	µm	2965.15	µm	2416.46	µm
	1501.62	µm	1375.84	µm	1017.93	µm	1175.68	µm	1317.03	µm		2389.8	µm	2578.78	µm	2616.66	µm	2970	µm	2447.32	µm
	1508.89	µm	1395.34	µm	1039.82	µm	1204.28	µm	1326.69	µm		2406.12	µm	2597.77	µm	2632.97	µm	2977.14	µm	2481	µm
	1510.26	µm	1413.02	µm	1057.33	µm	1204.65	µm	1345.89	µm		2430.1	µm	2598.63	µm	2642.41	µm	2988.62	µm	2499.36	µm
	1516.41	µm	1422.09	µm	1077.44	µm	1208.37	µm	1351.52	µm		2431.63	µm	2599	µm	2667.4	µm	2991.17	µm	2505.23	µm
	1534.18	µm	1422.55	µm	1084.74	µm	1217	µm	1357.43	µm		2452.3	µm	2606.47	µm	2674.03	µm	3013.88	µm	2536.1	µm
	1573.61	µm	1423.91	µm	1092.25	µm	1234.25	µm	1358.37	µm		2471.43	µm	2608.43	µm	2678.36	µm	3016.68	µm	2554.21	µm
	1574.52	µm	1449.76	µm	1099.65	µm	1249.96	µm	1389.37	µm		2490.56	µm	2613.83	µm	2705.39	µm	3033.52	µm	2584.31	µm
	1574.75	µm	1455.2	µm	1106.84	µm	1254.96	µm	1398.89	µm		2531.38	µm	2614.07	µm	2725.02	µm	3079.94	µm	2600.38	µm
	1583.64	µm	1456.56	µm	1107.57	µm	1256.59	µm	1399.43	µm		2536.99	µm	2624.61	µm	2739.05	µm	3124.08	µm	2622.32	µm
	1588.88	µm	1461.55	µm	1110.28	µm	1261.04	µm	1403.59	µm		2555.36	µm	2630.49	µm	2740.83	µm	3129.94	µm	2643.74	µm
	1669.1	µm	1473.79	µm	1113.3	µm	1261.59	µm	1407.75	µm		2644.9	µm	2630.73	µm	2741.34	µm	3165.4	µm	2659.05	µm
	1679.35	µm	1478.32	µm	1122.26	µm	1276.03	µm	1436.07	µm		2645.15	µm	2635.51	µm	2742.11	µm	3167.7	µm	2673.84	µm
	1685.51	µm	1478.78	µm	1129.98	µm	1284.38	µm	1447.07	µm		2654.34	µm	2640.9	µm	2750.78	µm	3203.15	µm	2702.16	µm
	1708.3	µm	1497.37	µm	1134.46	µm	1297.55	µm	1447.74	µm		2693.88	µm	2646.78	µm	2760.47	µm	3203.41	µm	2763.63	µm
	1708.52	µm	1501	µm	1144.99	µm	1319.34	µm	1459.28	µm		2694.39	µm	2658.55	µm	2792.34	µm	3207.49	µm	2763.63	µm
	1716.04	µm	1509.16	µm	1149.99	µm	1319.8	µm	1474.05	µm		2702.04	µm	2663.08	µm	2823.45	µm	3227.13	µm	2786.59	µm
	1717.64	µm	1525.49	µm	1155.51	µm	1323.98	µm	1481.56	µm		2705.1	µm	2676.68	µm	2833.65	µm	3229.17	µm	2803.94	µm
	1731.31	µm	1554.05	µm	1160.1	µm	1337.51	µm	1485.05	µm		2737.24	µm	2680.23	µm	2845.89	µm	3230.96	µm	2840.67	µm
	1746.58	µm	1581.72	µm	1161.04	µm	1339.78	µm	1487.6	µm		2773.72	µm	2713.07	µm	2859.15	µm	3254.43	µm	2847.05	µm
	1750	µm	1582.17	µm	1172.19	µm	1352.95	µm	1497.26	µm		2783.93	µm	2719.69	µm	2866.03	µm	3262.59	µm	2907.25	µm
	1764.13	µm	1589.42	µm	1173.44	µm	1356.4	µm	1499.54	µm		2806.63	µm	2721.04	µm	2870.62	µm	3287.59	µm	2908.27	µm
	1787.15	µm	1597.59	µm	1174.48	µm	1358.48	µm	1502.63	µm		2878.32	µm	2722.75	µm	2885.41	µm	3293.45	µm	2945.26	µm
	1794.84	µm	1608.92	µm	1175.32	µm	1367.48	µm	1510.01	µm		2881.38	µm	2731.94	µm	2899.69	µm	3301.87	µm	2950.61	µm
	1808.11	µm	1640.67	µm	1186.16	µm	1377.56	µm	1512.96	µm		2884.95	µm	2735.25	µm	2906.06	µm	3315.65	µm	2954.19	µm
	1809.94	µm	1641.57	µm	1186.78	µm	1382.73	µm	1514.71	µm		2945.41	µm	2753.5	µm	2914.48	µm	3384.52	µm	2971.79	µm
	1812.22	µm	1648.83	µm	1199.19	µm	1384.82	µm	1523.16	µm		3006.12	µm	2754.97	µm	2933.86	µm	3389.37	µm	2972.55	µm
	1827.26	µm	1656.54	µm	1202.42	µm	1390.27	µm	1527.05	µm		3006.38	µm	2761.59	µm	2933.86	µm	3390.64	µm	2983.27	µm
	1830.9	µm	1660.62	µm	1211.49	µm	1401.53	µm	1533.5	µm		3020.15	µm	2767.59	µm	2936.15	µm	3399.32	µm	2984.29	µm
	1853.69	µm	1666.97	µm	1216.28	µm	1418.6	µm	1541.15	µm		3057.14	µm	2769.19	µm	2959.36	µm	3418.96	µm	2999.08	µm
	1863.72	µm	1671.5	µm	1235.56	µm	1419.33	µm	1549.6	µm		3059.69	µm	2791.24	µm	2996.58	µm	3440.64	µm	3050.61	µm
	1878.99	µm	1671.96	µm	1240.15	µm	1423.87	µm	1551.08	µm		3080.36	µm	2803.98	µm	3014.69	µm	3443.45	µm	3074.59	µm
	1896.31	µm	1697.81	µm	1240.25	µm	1424.69	µm	1551.21	µm		3124.74	µm	2808.52	µm	3022.34	µm	3465.13	µm	3084.03	µm
	1916.13	µm	1700.53	µm	1241.82	µm	1432.68	µm	1554.43	µm		3133.16	µm	2809.38	µm	3050.64	µm	3519.97	µm	3150.35	µm
	1952.83	µm	1703.7	µm	1244.94	µm	1441.94	µm	1558.05	µm		3172.7	µm	2818.93	µm	3059.31	µm			3174.84	µm
	1958.75	µm	1704.15	µm	1246.61	µm	1444.94	µm	1574.83	µm		3289.8	µm	2836.45	µm	3089.65	µm			3185.3	µm
	1962.4	µm	1705.97	µm	1255.68	µm	1445.48	µm	1580.33	µm		3304.59	µm	2878.85	µm	3105.72	µm			3185.81	µm
	1969.01	µm	1710.5	µm	1256.72	µm	1449.21	µm	1582.21	µm		3329.85	µm	2899.8	µm	3124.59	µm			3191.67	µm
	1977.21	µm	1715.94	µm	1262.46	µm	1453.2	µm	1589.86	µm		3350.26	µm	2900.53	µm	3168.95	µm			3215.65	µm
	1997.95	µm	1736.35	µm	1281.32	µm	1454.2	µm	1597.24	µm		3386.73	µm	2906.17	µm	3180.17	µm			3215.65	µm
	2046.26	µm	1758.12	µm	1298.73	µm	1455.84	µm	1608.25	µm		3413.52	µm	2909.6	µm	3227.34	µm			3336.05	µm
	2076.12	µm	1765.83	µm	1299.15	µm	1465.1	µm	1613.34	µm		3427.55	µm	2931.04	µm	3291.09	µm			3411.31	µm
	2082.5	µm	1779.43	µm	1311.34	µm	1465.1	µm	1632.67	µm		3431.89	µm	2997.45	µm	3310.98	µm			3420.74	µm
	2108.93	µm	1785.33	µm	1322.39	µm	1466.55	µm	1632.94	µm		3444.39	µm	3005.17	µm	3352.8	µm			3442.43	µm
	2157.25	µm	1785.78	µm	1333.33	µm	1481.36	µm	1644.48	µm		3449.23	µm	3057.24	µm	3476.21	µm			3545.74	µm
	2158.39	µm	1787.14	µm	1338.96	µm	1493.16	µm	1649.44	µm		3477.81	µm	3067.17	µm	3488.96	µm			3596.76	µm
	2175.02	µm	1798.48	µm	1340.53	µm	1502.24	µm	1649.98	µm		3633.16	µm	3093.02	µm
	2183.45	µm	1803.92	µm	1341.88	µm	1517.95	µm	1653.47	µm		3633.93	µm	3101.48	µm
	2190.52	µm	1806.19	µm	1359.18	µm	1528.22	µm	1656.69	µm		3652.81	µm	3102.58	µm
	2195.76	µm	1812.53	µm	1361.58	µm	1546.47	µm	1667.83	µm		3704.85	µm	3265.9	µm
	2213.54	µm	1817.98	µm	1364.92	µm	1563.36	µm	1671.59	µm		3726.53	µm	3307.44	µm
	2217.18	µm	1819.34	µm	1381.7	µm	1579.89	µm	1673.06	µm		3775.77	µm	3340.15	µm
	2224.02	µm	1821.6	µm	1390.24	µm	1598.05	µm	1677.63	µm		3858.42	µm	3407.54	µm
	2230.86	µm	1830.22	µm	1394.83	µm	1612.4	µm	1684.87	µm		3901.02	µm	3465.62	µm
	2249.54	µm	1850.63	µm	1398.37	µm	1612.85	µm	1685.54	µm		3915.31	µm
	2257.06	µm	1872.85	µm	1402.54	µm	1620.66	µm	1689.3	µm		3971.43	µm
	2261.85	µm	1891.89	µm	1417.03	µm	1624.66	µm	1697.76	µm
	2264.13	µm	1897.79	µm	1427.25	µm	1637.19	µm	1701.38	µm
	2265.04	µm	1919.1	µm	1428.81	µm	1654.17	µm	1707.55	µm
	2274.38	µm	1927.26	µm	1439.75	µm	1658.26	µm	1710.64	µm
	2274.38	µm	1928.62	µm	1440.17	µm	1667.71	µm	1713.05	µm
	2278.94	µm	1929.53	µm	1445.8	µm	1685.14	µm	1714.26	µm
	2283.27	µm	1932.7	µm	1452.57	µm	1695.04	µm	1715.2	µm
	2298.77	µm	1947.67	µm	1462.69	µm	1736.45	µm	1717.35	µm
	2306.75	µm	1953.11	µm	1466.54	µm	1737.45	µm	1719.5	µm
	2321.79	µm	1963.09	µm	1486.35	µm	1744.17	µm	1733.99	µm
	2323.15	µm	1970.34	µm	1493.12	µm	1756.52	µm	1736.14	µm
	2339.79	µm	1983.04	µm	1494.79	µm	1761.24	µm	1740.7	µm
	2388.79	µm	1985.76	µm	1495	µm	1761.79	µm	1757.88	µm
	2402.82	µm	2011.61	µm	1497.08	µm	1762.06	µm	1760.29	µm
	2435.51	µm	2021.13	µm	1502.81	µm	1763.33	µm	1768.75	µm
	2473.34	µm	2038.36	µm	1503.75	µm	1787.76	µm	1768.88	µm
	2487.24	µm	2043.35	µm	1522.2	µm	1791.58	µm	1781.09	µm
	2497.72	µm	2048.34	µm	1530.44	µm	1800.2	µm	1781.5	µm
	2525.3	µm	2066.03	µm	1536.48	µm	1800.39	µm	1785.39	µm
	2549.45	µm	2081.9	µm	1536.59	µm	1802.11	µm	1790.62	µm
	2562.67	µm	2084.16	µm	1536.79	µm	1802.2	µm	1810.22	µm
	2567	µm	2099.13	µm	1538.98	µm	1810.92	µm	1815.31	µm
	2585.92	µm	2106.38	µm	1547.11	µm	1813.55	µm	1815.72	µm
	2636.51	µm	2118.18	µm	1548.36	µm	1815.55	µm	1816.79	µm
	2637.19	µm	2124.98	µm	1548.57	µm	1823.91	µm	1826.18	µm
	2655.88	µm	2130.42	µm	1560.56	µm	1828.99	µm	1840.14	µm
	2673.66	µm	2142.21	µm	1562.75	µm	1830.72	µm	1861.88	µm
	2680.72	µm	2146.74	µm	1568.06	µm	1839.16	µm	1863.9	µm
	2705.33	µm	2151.73	µm	1575.15	µm	1850.88	µm	1867.25	µm
	2740.66	µm	2153.55	µm	1578.7	µm	1855.78	µm	1868.73	µm
	2760.94	µm	2154.45	µm	1582.66	µm	1874.58	µm	1891.54	µm
	2761.62	µm	2157.63	µm	1583.7	µm	1876.67	µm	1894.49	µm
	2771.88	µm	2158.99	µm	1587.66	µm	1876.76	µm	1895.57	µm
	2810.85	µm	2187.1	µm	1589.33	µm	1882.48	µm	1899.32	µm
	2849.59	µm	2220.66	µm	1595.68	µm	1895.65	µm	1899.32	µm
	2860.76	µm	2234.26	µm	1597.77	µm	1899.74	µm	1903.62	µm
	2865.31	µm	2241.97	µm	1611.94	µm	1900.01	µm	1912.61	µm
	2879.44	µm	2276.89	µm	1613.4	µm	1915.63	µm	1923.08	µm
	2882.18	µm	2284.15	µm	1614.45	µm	1930.16	µm	1930.32	µm
	2887.19	µm	2307.73	µm	1621.53	µm	1936.52	µm	1932.2	µm
	2905.88	µm	2316.34	µm	1629.46	µm	1937.42	µm	1932.47	µm
	2956.47	µm	2322.69	µm	1641.03	µm	1940.06	µm	1932.47	µm
	2961.49	µm	2369.85	µm	1644.47	µm	1941.15	µm	1932.61	µm
	3026.89	µm	2403.41	µm	1655.51	µm	1953.22	µm	1936.63	µm
	3117.59	µm	2406.13	µm	1656.56	µm	1960.04	µm	1950.45	µm
	3186.42	µm	2411.12	µm	1663.02	µm	1971.93	µm	1957.3	µm
			2435.15	µm	1677.72	µm	1973.39	µm	1966.02	µm
			2475.06	µm	1680.84	µm	1978.47	µm	1968.17	µm
			2480.05	µm	1689.28	µm	1982.38	µm	1976.89	µm
			2485.49	µm	1692.1	µm	1984.65	µm	1995.14	µm
			2505.9	µm	1695.02	µm	1987.55	µm	1995.54	µm
			2519.95	µm	1702.52	µm	1996.54	µm	2003.86	µm
			2543.08	µm	1708.05	µm	2004.17	µm	2007.76	µm
			2552.6	µm	1710.55	µm	2026.78	µm	2014.6	µm
			2562.58	µm	1711.69	µm	2037.68	µm	2017.82	µm
			2607.02	µm	1715.03	µm	2041.31	µm	2018.36	µm
			2618.36	µm	1731.71	µm	2042.77	µm	2039.83	µm
			2624.71	µm	1739.21	µm	2073.1	µm	2059.69	µm
			2759.84	µm	1740.46	µm	2074.82	µm	2090.29	µm
			2761.2	µm	1756.1	µm	2077.28	µm	2095.93	µm
			2846	µm	1762.56	µm	2085.27	µm	2098.88	µm
			2944.86	µm	1767.25	µm	2103.25	µm	2123.17	µm
			2953.93	µm	1777.57	µm	2118.69	µm	2127.19	µm
			3142.12	µm	1778.51	µm	2118.87	µm	2160.88	µm
			3172.95	µm	1783.3	µm	2127.41	µm	2161.41	µm
			3303.56	µm	1794.25	µm	2157.47	µm	2195.64	µm
				µm	1800.08	µm	2166.55	µm	2201.41	µm
					1802.06	µm	2172.45	µm	2223.82	µm
					1816.45	µm	2181.89	µm	2233.61	µm
					1828.64	µm	2213.68	µm	2247.71	µm
					1834.06	µm	2216.04	µm	2341.24	µm
					1836.36	µm	2224.94	µm	2349.97	µm
					1839.69	µm	2291.51	µm	2357.61	µm
					1847.2	µm	2365.16	µm	2386.2	µm
					1865.65	µm	2370.24	µm	2451.42	µm
					1870.23	µm	2404.21	µm	2456.65	µm
					1876.17	µm	2425.64	µm	2640.91	µm
					1882.11	µm	2479.22	µm	3091.95	µm
					1884.93	µm	2490.3	µm	3411.35	µm
					1892.02	µm	2524.63	µm
					1892.85	µm	2547.97	µm
					1893.89	µm	2608.27	µm
					1905.98	µm	2619.71	µm
					1905.98	µm	2629.15	µm
					1915.78	µm
					1919.01	µm
					1946.32	µm
					1982.49	µm
					2015.74	µm
					2017.93	µm
					2052.85	µm
					2111.11	µm
					2130.5	µm
					2149.26	µm
					2158.02	µm
					2158.02	µm
					2162.91	µm
					2163.33	µm
					2171.15	µm
					2178.97	µm
					2190.43	µm
					2206.59	µm
					2223.16	µm
					2237.54	µm
					2261.93	µm
					2311.86	µm
					2315.61	µm
					2376.8	µm
					2441.21	µm
		Con1	Con2	Con3	Con4	Con5						Val1	Val2	Val3	Val4	Val5
	Con Total	174	194	237	212	207					Val Total	128	126	118	106	118
		0-500	500-1000	1000-1500	1500-2000	2000-2500	2500-3000	3000-3500	3500-4000			0-500	500-1000	1000-1500	1500-2000	2000-2500	2500-3000	3000-3500	3500-4000
		3	37	33	39	34	25	3	0			1	10	18	22	29	18	20	10
		1	37	49	54	37	13	3	0
												0	3	11	16	38	47	11	0
		3	65	74	74	21	0	0	0			0	2	14	17	33	37	15	0
		4	38	76	62	27	5	0	0			1	1	7	10	18	40	28	1
		4	44	46	85	25	1	2	0			0	14	19	21	22	26	14	2
		1.72414	21.2644	18.9655	22.4138	19.5402	14.3678	1.72414	0			0.78125	7.8125	14.0625	17.1875	22.6562	14.0625	15.625	7.8125
		0.515464	19.0722	25.2577	27.8351	19.0722	6.70103	1.54639	0			0	2.38095	8.73016	12.6984	30.1587	37.3016	8.73016	0
		1.26582	27.4262	31.2236	31.2236	8.86076	0	0	0			0	1.69492	11.8644	14.4068	27.9661	31.3559	12.7119	0
		1.88679	17.9245	35.8491	29.2453	12.7358	2.35849	0	0			0.943396	0.943396	6.60377	9.43396	16.9811	37.7358	26.4151	0.943396
		1.93237	21.256	22.2222	41.0628	12.0773	0.483092	0.966184	0			0	11.8644	16.1017	17.7966	18.6441	22.0339	11.8644	1.69492
		1.46492	21.3887	26.7036	30.3561	14.4573	4.78209	0.847343	0			0.344929	4.93923	11.4725	14.3047	23.2813	28.498	15.0693	2.09016
		0.265027	1.6409	3.05058	3.05005	2.08665	2.672	0.367936	0			0.212775	2.11247	1.72505	1.53001	2.55767	4.58899	3.04179	1.4655
			500	1000	1500	2000	2500	3000	3500	4000
		Con	1.46492	21.3887	26.7036	30.3561	14.4573	4.78209	0.847343	0
		Val	0.344929	4.93923	11.4725	14.3047	23.2813	28.498	15.0693	2.09016
		SE	0.265027	1.6409	3.05058	3.05005	2.08665	2.672	0.367936	0
		SE	0.212775	2.11247	1.72505	1.53001	2.55767	4.58899	3.04179	1.4655
