# Supplementary material for: Fecal transplant from myostatin deletion pigs positively impacts the gut-muscle axis
Source: eLife journal article supplement (doi:10.7554/elife.81858), 2023-04-11
Supplement: fig7-data1 [file fig7.d.xlsx]

## Sheet: fig7.d
	MyHC I			MyHC Iia			MyHC Iib			actin
Con	1	28413.5		1	22435.3		1	23682.7		1	20353.1
	2	25151.4		2	13187.1		2	8984.23		2	22789.6
	3	23839.8		3	20830.7		3	12963.9		3	22802.5
Val	4	27837.7		4	18942.3		4	25375.1		4	25753.7
	5	19241.7		5	22318.5		5	25297.2		5	24025.5
	6	16755		6	25816.3		6	19693.9		6	20744.4
Con		1.39603		1.18136	1.10231		1.2746	1.16359		1.64168
		1.10363		0.933923	0.578644		0.669088	0.394225		0.5562
		1.04549	1.18172	0.88472	0.913526	0.864825	1.05631	0.568528	0.708783	0.802119
Val		1.08092		0.914702	0.735519		0.850483	0.9853		1.39013
		0.800888		0.677731	0.928952		1.07415	1.05293		1.48555
		0.807687		0.683485	1.24449		1.43901	0.949358		1.33942
Con	1	28013.3		1	21998.5		1	23390.1
	2	24948		2	12949.3		2	8881.4
	3	23445.1		3	20425.7		3	12809.5
Val	4	27590.2		4	18612.8		4	25229.2
	5	19118.4		5	21892.5		5	25040.9
	6	16538.4		6	25292.9		6	19625.3
Con		1.37637		1.17999	1.08084		1.27417	1.14922		1.6412
		1.09471		0.938521	0.568213		0.669846	0.389713		0.55655
		1.02818	1.16642	0.881485	0.895765	0.848274	1.05599	0.561756	0.70023	0.802245
Val		1.07131		0.91846	0.722722		0.851991	0.979635		1.39902
		0.795756		0.682222	0.911221		1.07421	1.04226		1.48846
		0.797247		0.683499	1.21926		1.43734	0.946052		1.35106
		MyHC I	Ttest		MyHC Iia	Ttest		MyHC Iib	Ttest
	Con	1.18136			1.2746			1.44168
		0.933923			0.669088			0.5562
		0.88472			1.05631			0.802119
		1.17999			1.27417			1.6412
		0.938521			0.669846			0.55655
		0.881485			1.05599			0.802245
	Val	0.914702			0.850483			1.39013
		0.677731			1.07415			1.48555
		0.683485			1.43901			1.33942
		0.91846			0.851991			1.39902
		0.682222			1.07421			1.48846
		0.683499	0.0103665		1.43734	0.454126		1.35106	0.0429281
