# Supplementary material for: Fecal transplant from myostatin deletion pigs positively impacts the gut-muscle axis
Source: eLife journal article supplement (doi:10.7554/elife.81858), 2023-04-11
Supplement: fig7-data1 [file fig7.e.xlsx]

## Sheet: fig7.e
	HK2			PFK1			PKM2			actin
Con	1	10431.6	0.458578	1	19596.4	0.86147	1	16846.4	0.740579	1	22747.6
	2	9205.62	0.443423	2	22910.7	1.10358	2	13578.5	0.654061	2	20760.3
	3	9960.57	0.525818	3	19417.3	1.02504	3	12011	0.63406	3	18943
Val	4	11681	0.83528	4	24068.6	1.72109	4	19402.5	1.38743	4	13984.5
	5	13596.7	0.661391	5	23896.2	1.1624	5	14374.5	0.699225	5	20557.7
	6	12463	0.702771	6	22206.2	1.25217	6	26162.1	1.47524	6	17734.1
Con	1	11334.6	0.498275	1	19723.6	0.867061	1	10505.8	0.46184
	2	10037	0.483471	2	23298.5	1.12226	2	8430.88	0.406105
	3	11004.7	0.580937	3	20120.9	1.06218	3	7647.93	0.403734
Val	4	12951.2	0.926112	4	24242.7	1.73354	4	12532.2	0.896146
	5	14977.9	0.72858	5	24488.7	1.19122	5	9296.23	0.452201
	6	13522.7	0.762526	6	22935.2	1.29328	6	15567.2	0.877809
Con	0.458578		0.963521		0.86147		0.864326		0.740579		1.09515
	0.443423		0.931679		1.10358		1.10724		0.654061		0.967213
	0.525818	0.47594	1.1048		1.02504	0.996696	1.02844		0.63406	0.676233	0.937636
Val	0.83528		1.75501		1.72109		1.72679		1.38743		2.0517
	0.661391		1.38965		1.1624		1.16625		0.699225		1.034
	0.702771		1.4766		1.25217		1.25633		1.47524		2.18155
Con	0.498275		0.956576		0.867061		0.852426		0.46184		1.08952
	0.483471		0.928157		1.12226		1.10332		0.406105		0.958037
	0.580937	0.520894	1.11527		1.06218	1.01717	1.04425		0.403734	0.423893	0.952443
Val	0.926112		1.77793		1.73354		1.70428		0.896146		2.11409
	0.72858		1.39871		1.19122		1.17111		0.452201		1.06678
	0.762526		1.46388		1.29328		1.27145		0.877809		2.07083
		HK2			PFK1			PKM2
			Ttest			Ttest			Ttest
	Con	0.963521			0.864326			1.09515
		0.931679			1.10724			0.967213
		1.1048			1.02844			0.937636
		0.956576			0.852426			1.08952
		0.928157			1.10332			0.958037
		1.11527			1.04425			0.952443
	Val	1.75501			1.72679			2.0517
		1.38965			1.16625			1.034
		1.4766			1.25633			2.18155
		1.77793			1.70428			2.11409
		1.39871			1.17111			1.06678
		1.46388	4.81529e-05		1.27145	0.00820454		2.07083	0.00739033
