# Supplementary material for: Fecal transplant from myostatin deletion pigs positively impacts the gut-muscle axis
Source: eLife journal article supplement (doi:10.7554/elife.81858), 2023-04-11
Supplement: fig7-data1 [file fig7.f.xlsx]

## Sheet: fig7.f
	p-AKT			AKT			p-mTOR			mTOR			actin
Con	1	20873.1	1.72985	1	24374.1	2.01999	1	13085.1	1.08442	1	22598.4	1.87283	1	12066.4
	2	14979.9	1.08109	2	26319.3	1.89944	2	7768.23	0.560627	2	22854.3	1.64938	2	13856.3
	3	10724.2	0.85476	3	25575	2.03841	3	10050.3	0.801044	3	21890	1.74471	3	12546.5
Val	4	14403.8	1.01981	4	23843.5	1.68816	4	15690.3	1.1109	4	24430.4	1.72971	4	14124
	5	23020.5	1.93349	5	24496.5	2.05746	5	20682.4	1.73711	5	19610.5	1.64709	5	11906.2
	6	27600.2	2.56374	6	23567	2.18909	6	25512.2	2.36979	6	21086.9	1.95872	6	10765.6
Con	1	19845.6	1.64469		1	24590.5	2.03792
	2	13955.2	1.00713		2	26684	1.92576
	3	9725.47	0.775154		3	25887.5	2.06333
Val	4	13271.3	0.93963		4	24405	1.72791
	5	22518.7	1.89135		5	24759.7	2.07957
	6	27594.7	2.56323		6	23911.4	2.22109
		p-akt/total akt		Ttest			p-mTOR/total mTOR		Ttest
	Con	0.807044				Con	1.23825
		0.925537					0.72688
		0.681885					0.981842
	Val	1.15404				Val	1.37344
		1.52816					2.25538
		1.90445		0.0335656			2.58729		0.0495106
