# Supplementary material for: Fecal transplant from myostatin deletion pigs positively impacts the gut-muscle axis
Source: eLife journal article supplement (doi:10.7554/elife.81858), 2023-04-11
Supplement: fig7-data1 [file fig7.g.xlsx]

## Sheet: fig7.g
Grip Strength (N)	耳号	1	2	3	average
Control	277	260	237	192	229.667
	270	233	178	207	206
	283	153	177	187	172.333
	292	168	136	165	156.333
	256	182	176	142	166.667
	259	204	172	162	179.333
	261	177	191	207	191.667
	264	152	175	108	145
Valeric acid	286	207	283	225	238.333
	27	202	240	200	214
	255	257	289	311	285.667
	248	188	168	230	195.333
	257	219	221	204	214.667
	290	207	205	168	193.333
	273	233	195	251	226.333
	94	185	220	210	205
Control	average	191.125	180.25	171.25	180.875
Valeric acid	average	212.25	227.625	224.875	221.583
	Ttext	0.209379	0.0183349	0.0147793	0.0133181
	SE	13.6701	9.84115	12.1122	9.72375
	SE	8.41926	14.772	15.0219	10.5875
