# Supplementary material for: Fecal transplant from myostatin deletion pigs positively impacts the gut-muscle axis
Source: eLife journal article supplement (doi:10.7554/elife.81858), 2023-04-11
Supplement: fig7-data1 [file fig7.h.xlsx]

## Sheet: fig7.h1
The small intestine length (cm)	No
Control	504	34
	505	32.5
	518	33.5
	510	34
	514	35.3
	511	33.7
	508	32.5
	512	32
	513	34
Valeric acid	506	37.5
	503	36
	502	32.5
	507	33.7
	519	36.5
	515	34.5
	520	37
	509	34.5
	501	34
Control	average	33.5
Valeric acid	average	35.1333
	Ttext	0.0243111
	SE	0.339116
	SE	0.562485

## Sheet: fig7.h2
The colon length (cm)	No
Control	505	7
	518	6.5
	510	7
	514	6.8
	511	7.8
	508	5.3
	512	5
	513	6.6
	517	7.7
Valeric acid	506	8
	503	7
	502	7.3
	507	7
	519	7.7
	515	6.5
	520	6
	509	7.5
	501	7.8
Control	average	6.63333
Valeric acid	average	7.2
	Ttext	0.159492
	SE	0.317543
	SE	0.216025
