# Supplementary material for: Fecal transplant from myostatin deletion pigs positively impacts the gut-muscle axis
Source: eLife journal article supplement (doi:10.7554/elife.81858), 2023-04-11
Supplement: fig7-data1 [file fig7.i.xlsx]

## Sheet: fig7.i
			Ct (dR)			ΔΔCT	average	fold	SE	errorbar	test
GPR41	Con	C1	35.04
			35.02	35.03	23.82	0.000422137
		C2	34.71
			34.62	34.665	23.69	0.000496816
		C3	36.17
			35.78	35.975	24.58	0.000371333
		C4	38
			37.22	37.61	23.37	5.16812e-05
		C5	32.14
			32.52	32.33	22.74	0.00129754
		C6	35.27													GPR41	GPR43	GPR109a
			34.95	35.11	26.24	0.00213729									Con	1	1	1	0.000288747	0.000501202	0.000589891
		C7	37.32												Val	2.54491	2.81018	1.62338	0.000444634	0.00118058	0.000593377
			37.82	37.57	23.03	4.19782e-05	0.000688398	1	0.000288747	0.419448						0.419448	0.289269	0.366633
	Val	V1	32.25													0.253799	0.242465	0.22718
			32.34	32.295	23.68	0.00255051
		V2	33.5
			34.07	33.785	23.71	0.000927092
		V3	33.02
			33.05	33.035	23.64	0.00148533
		V4	32.79
			32.66	32.725	24.94	0.004534
		V5	33.44
			33.76	33.6	23.17	0.000724865
		V6	34.43
			34.49	34.46	25.03	0.00144973
		V7	33.87
			33.71	33.79	23.71	0.000923884
		V8	33.71
			33.47	33.59	24.13	0.0014199	0.00175191	2.54491	0.000444634	0.253799	0.0685021
GPR43	Con	C1	32.63
			31.98	32.305	23.82	0.002791
		C2	32.17
			33.73	32.95	23.69	0.00163103
		C3	34
			33.86	33.93	24.58	0.00153239
		C4	34.44
			34.12	34.28	23.37	0.000519712
		C5	30.49
			30.87	30.68	22.74	0.00407213
		C6	35.7
			35.81	35.755	26.24	0.00136678
		C7	34.92
			35.5	35.21	23.03	0.000215504	0.00173265	1	0.000501202	0.289269
	Val	V1	30.74
			30.78	30.76	23.68	0.00739108
		V2	32.4
			32.21	32.305	23.71	0.00258611
		V3	31.77
			31.83	31.8	23.64	0.00349619
		V4	31.26
			31.44	31.35	24.94	0.0117597
		V5	33.01
			32.53	32.77	23.17	0.00128858
		V6	33.02
			32.57	32.795	25.03	0.00459729
		V7	32.56
			31.8	32.18	23.71	0.00282017
		V8	31.67
			31.87	31.77	24.13	0.00501338	0.00486907	2.81018	0.00118058	0.242465	0.0359756
GPR109a	Con	C1	31.65
			31.81	31.73	23.82	0.0041577
		C2	32.38
			33.81	33.095	22.3	0.000562835
		C3	33.27
			33.59	33.43	23.27	0.000874048
		C4	34.2
			33.74	33.97	21.92	0.000235824
		C5	30
			29.6	29.8	21.46	0.0030861
		C6	33.96
			33.18	33.57	24.73	0.0021822
		C7	34.15
			33.56	33.855	21.28	0.000163888	0.00160894	1	0.000589891	0.366633
	Val	V1	30.14
			29.66	29.9	22.18	0.00474295
		V2	32
			32.47	32.235	22.06	0.000865007
		V3	31.56
			31.1	31.33	22.13	0.00170029
		V4	31.03
			30.94	30.985	23.3	0.00485942
		V5	32.63
			32.8	32.715	21.82	0.000525144
		V6	31.91
			31.9	31.905	23.79	0.00360696
		V7	31.23
			31.92	31.575	22.38	0.0017062
		V8	30.87
			31.46	31.165	22.73	0.00288943	0.00261193	1.62338	0.000593377	0.22718	0.252132
