# Supplementary material for: Fecal transplant from myostatin deletion pigs positively impacts the gut-muscle axis
Source: eLife journal article supplement (doi:10.7554/elife.81858), 2023-04-11
Supplement: fig7-figsupp1-data1 [file elife-81858-fig7-figsupp1-data1-v2.zip]

## Sheet: a
Food In	耳号
Control	277	3.75
	270	3.65
	283	3.95
	292	3.8
	256	3.45
	259	3.3
	261	3.9
	264	3.5
Valeric acid	286	3.7
	27	3.1
	255	2.65
	248	4.5
	257	2.55
	290	3.4
	273	4.15
	94	3.8
Control	average	3.6625
Valeric acid	average	3.48125
	Ttext	0.493064
	SE	0.0811469
	SE	0.24439

## Sheet: b
Physical activity （counts/day）	耳号
Control	277	6726
	270	7432
	283	5052
	292	8315
	256	7001
	259	5581
	261	5985
	264	9392
Valeric acid	286	6786
	27	6484
	255	8639
	248	6527
	257	8517
	290	7396
	273	6867.3
	94	8291
Control	average	6935.5
Valeric acid	average	7438.41
	Ttext	0.41808
	SE	509.162
	SE	322.569

## Sheet: c
Energy intake (KJ/day)	耳号
Control	277	64.2037
	270	62.4916
	283	67.6279
	292	65.0598
	256	59.0675
	259	56.4993
	261	65.9158
	264	59.9235
Valeric acid	286	63.3477
	27	53.0751
	255	45.3707
	248	77.0445
	257	43.6585
	290	58.2114
	273	71.0522
	94	65.0598
Control	average	62.5987
Valeric acid	average	59.6025
	Ttext	0.506632
	SE	1.34808
	SE	4.1842

## Sheet: d
Absorbed energy (KJ/day)	耳号
Control	277	49.638
	270	49.6415
	283	51.437
	292	53.0156
	256	46.6036
	259	44.1004
	261	51.5933
	264	47.9652
Valeric acid	286	48.7764
	27	41.1616
	255	35.5434
	248	59.7321
	257	34.8727
	290	46.9889
	273	56.017
	94	51.7091
Control	average	49.2493
Valeric acid	average	46.8502
	Ttext	0.489861
	SE	1.03449
	SE	3.22096

## Sheet: e
No absorbed energy (KJ/day)	耳号
Control	277	14.5657
	270	12.8502
	283	16.191
	292	12.0442
	256	12.4638
	259	12.3989
	261	14.3226
	264	11.9583
Valeric acid	286	14.5713
	27	11.9135
	255	9.82723
	248	17.3124
	257	8.78583
	290	11.2225
	273	15.0351
	94	13.3507
Control	average	13.3493
Valeric acid	average	12.7523
	Ttext	0.609403
	SE	0.535799
	SE	1.00893
