# Supplementary material for: Fecal transplant from myostatin deletion pigs positively impacts the gut-muscle axis
Source: eLife journal article supplement (doi:10.7554/elife.81858), 2023-04-11
Supplement: fig8-data1 [file fig8.a.xlsx]

## Sheet: fig8.a
	No.	GA	EDL	Sol
Inhibitor	348	235.9	16.7	14
	354	226.6	19.1	9.8
	318	215.7	12.5	12.1
	156	227.7	17.2	13.1
	357	243.9	14.2	14.6
	360	269.4	17.4	12.8
	355	247.3	18.7	13.8
	345	248.7	18.6	13.5
Inhibitor+Valeric Acid	359	279.4	20.2	13.5
	349	260	19.8	14.2
	353	213.4	17.9	9
	352	242.1	18.1	12.8
	358	243.2	17.1	14.2
	316	239.6	16.5	12.9
	315	216.2	15.1	11.3
	344	229.1	16.8	12
Avg.		239.4	16.8	12.9625
Avg.		240.375	17.6875	12.4875
ttest		0.921609	0.398472	0.565703
