# Supplementary material for: Fecal transplant from myostatin deletion pigs positively impacts the gut-muscle axis
Source: eLife journal article supplement (doi:10.7554/elife.81858), 2023-04-11
Supplement: fig8-data1 [file fig8.b.xlsx]

## Sheet: fig8.b
	GA	CSA(μm²)
	In	936.853
		1191.18
		1272.3
		1174.04
		940.962
		1260.86
		913.343
	In+Val	1533.22
		841.866
		972.521
		853.152
		1367.35
		1120.75
		1463.87
	Avg.	1098.51
	Avg.	1164.68
	Ttest	0.607924
	In1		In2		In3		In4		In5		In6		In7		V1		V2		V3		V4		V5		V6		V7
	936.853		1191.18		1272.3		1174.04		940.962		1260.86		913.343		1533.22		841.866		972.521		853.152		1367.35		1120.75		1463.87
	980.853		1595.36		1622.67		1595.36		894.075		1601.76		1233.72		1564.06		1015.43		1586.09		993.91		1195.44		1147.98		1953.29
	868.262		1509.72		730.066		1509.72		1096.33		1112.61		588.356		1839.88		775.738		625.58		1136.19		1380.81		1803.53		1647.52
	905.723		1693.36		1389.39		1693.36		794.492		1116.85		1086.97		1489.91		956.709		1024.7		1540.14		1105.62		1543.81		2322.88
	443.08		1066.08		987.958		1066.08		718.832		1252.01		703.166		1622.74		417.802		848.653		718.734		1044.19		1525.15		1626.33
	767.95		1083.87		1460.25		1083.87		996.749		1014.32		564.09		1871.87		828.736		1284.84		772.075		651.637		597.17		940.884
	894.069		1687.37		1643.51		1687.37		862.598		1436.74		1062.59		1137.82		783.521		772.177		1000.32		1175.32		972.62		2142.25
	1016.23		1054.87		1945.58		1054.87		1240.44		1088.46		1310.87		1951.31		790.618		1149.47		974.795		1412.16		1121.88		2143.26
	993.757		967.884		1097.85		967.884		801.016		1272.77		577.024		1151.59		894.439		912.207		1099.1		2364.41		1994.8		1251.32
	713.007		642.55		1774.8		642.55		981.983		2887.67		821.639		926.612		703.853		889.327		836.176		1166		1689.52		1932.86
	1008.53		969.43		1492.18		969.43		978.664		1242.47		846.02		1762.98		790.618		710.53		856.894		1344.8		1146.72		1928.69
	813.944		1522.67		1765.41		1522.67		671.558		890.175		625.558		993.555		643.529		1179.77		460.727		1714.25		487.512		2000.26
	1013.74		1365.9		1405.99		1365.9		455.336		1610.24		548.293		963.685		778.828		1015.8		919.278		739.129		1198		1655.44
	651.613		1603.28		639.294		1603.28		991.141		1242.69		1259.7		1297.13		782.606		964.109		695.382		1773.57		1094.76		1226.55
	982.291		1449.41		1217.01		1449.41		1106.63		1120.45		939.653		1715.1		597.285		949.703		1039.35		1318.74		952.703		1459.49
	825.881		1791.17		1422.01		1791.17		508.447		499.532		1304		1861.49		794.396		1023.64		538.449		1604.52		591.447		1240.86
	340.166		1060.48		1254.66		1060.48		574.15		1250.1		1032.26		2021.43		696.985		628.122		849.683		1987.11		1495.16		1331.2
	1276.45		1352.18		1227.88		1352.18		835.241		870.05		1194.23		1850.47		821.41		919.833		939.882		2110.19		1238.98		1555.29
	996.347		1268.86		790.962		1268.86		752.598		1239.93		805.613		1639.26		763.146		906.911		790.618		2146.84		1377.26		720.981
	1052.83		1513.97		1792.66		1513.97		878.852		1390.98		599.46		1541.39		924.2		975.549		501.591		2268.02		1320.14		1456.75
	891.435		1319.51		1154.39		1319.51		1254.98		764.55		921.797		1563.21		814.313		872.168		640.324		945.043		939.31		932.534
	1049.89		1250.3		1483.37		1250.3		1041.85		1237.18		937.936		1009.02		486.024		885.091		537.762		1558.34		1136.65		1318.5
	821.28		1441.48		995.856		1441.48		992.857		1201.8		1268.74		1242.47		623.955		950.339		911.724		1538.42		849.111		1457.88
	1297.16		1441.29		1707.26		1441.29		966.187		1215.15		1030.31		1064.1		830.567		508.429		1017.83		1333.78		1169.27		1468.33
	776.683		816.525		1321.51		816.525		993.201		1616.38		617.545		1810.64		763.261		921.952		678.556		623.461		457.865		675.006
	847.987		1605.79		911.037		1605.79		1173.94		1237.18		546.118		1100.54		739.223		1003.3		884.939		1618.08		842.014		1477.49
	743.203		1130.65		1150.39		1130.65		1048.6		1238.24		623.727		1895.81		767.382		658.416		1006.27		1477.83		1353.22		1184.6
	875.461		1504.31		1550.79		1504.31		664.003		1458.34		1154.62		1013.05		863.19		900.979		921.453		936.781		1125.66		1592.11
	559.83		695.902		1028.59		695.902		1396.57		1406.23		1075.3		1860.22		793.938		1050.12		1056.64		1577.61		1730.62		1503.37
	919.292		1419.06		1001.24		1419.06		847.374		1293.53		989.904		1481.22		835.031		951.61		624.642		1539.27		822.325		1192.47
	614.139		912.598		1216.89		912.598		862.14		1880.13		1015.09		1697.09		378.082		775.143		1018.06		1373.18		1708.98		1837.26
	796.106		1403.02		1440.33		1403.02		1222.13		1115.58		916.073		1820.39		756.965		1211.12		947.323		782.557		1183.81		1714.92
	573.887		1003.84		975.023		1003.84		1065.89		960.931		639.294		1763.4		772.762		712.648		593.851		1476.14		840.755		1758.33
	569.798		1366.09		1382.75		1366.09		904.148		1551.98		492.777		1566.6		492.548		1307.09		924.429		1232.94		1394.66		2212.3
	840.193		1147.47		549.324		1147.47		521.496		1396.06		838.122		1617.23		914.013		1054.99		989.675		1468.3		751.585		1183.31
	724.674		891.914		1385.04		891.914		736.23		1440.34		909.091		1182.52		900.964		608.632		960.83		910.936		1718.02		2028.07
	779.111		1201.78		1107.12		1201.78		846.23		1683.54		907.259		789.972		676.496		1808.74		443.213		1394.16		997.459		784.961
	796.49		1355.46		1344.52		1355.46		843.711		1199.26		1048.4		1964.44		848.767		659.475		976.626		726.418		639.408		1510.6
	856.421		722.385		945.72		722.385		870.267		1343.31		545.203		1643.92		760.857		968.558		840.64		1626.76		664.019		1377.66
	635.352		1572.16		1430.6		1572.16		1210.11		749.086		545.546		830.011		812.138		769.635		979.144		1579.1		1637.33		1089.43
	648.514		963.438		1515.99		963.438		1078.02		1006.05		676.724		1245.65		886.198		933.391		864.22		1614.69		696.527		1960.39
	1133.08		1075.17		1666.06		1075.17		1072.3		1287.6		1025.39		1524.23		828.049		960.508		709.691		1401.99		1577.8		846.691
	719.307		1593.81		563.746		1593.81		696.397		1249.46		988.416		1486.73		810.307		855.856		599.231		519.022		1407.59		1575.87
	1034.55		1351.98		1685.86		1351.98		1325.72		1052.87		1049.77		1300.31		734.415		1211.33		561.686		1525.08		1788.99		1287
	726.463		1579.31		1519.2		1579.31		1347.92		737.222		917.218		2213.57		812.71		676.635		888.716		982.116		2213.66		1482.31
	1169.75		1518.03		935.304		1518.03		1072.07		1143.97		977.771		2055.75		644.903		1050.75		859.641		1197.99		781.347		1424.6
	949.961		797.194		1349.79		797.194		989.195		1361.53		425.471		1079.14		825.531		1206.88		706.371		1434.41		814.313		1048.12
	1161.96		1233.68		665.163		1233.68		691.933		1220.87		910.236		1732.26		430.851		732.985		1005.81		1833.31		1611.57		1281.69
	767.993		1461.78		1209.34		1461.78		515.43		1182.52		601.062		1214.72		649.253		676.846		670.314		1489.27		1768.96		1214.5
	1208.6		1536.4		1627.25		1536.4		1050.32		1230.19		866.738		1082.53		902.795		490.422		929.123		1144.6		1860.31		1666.7
	848.499		1679.64		1404.16		1679.64		1021.36		1036.14		1059.16		2061.47		1026.53		1213.24		1083.42		1316.62		769.557		932.534
	862.3		720.452		1330.56		720.452		775.834		1217.26		1189.08		1855.34		808.475		699.302		541.082		979.786		691.491		1335.7
	671.004		1290.51		909.663		1290.51		1004.99		1176.17		945.491		1964.87		514.869		846.747		728.349		655.45		966.21		1197.62
	758.793		1375.18		1029.17		1375.18		1120.26		1317.26		405.439		1894.32		999.405		1162.18		975.367		1605.79		1328.04		1118.85
	771.188		1294.96		1285.23		1294.96		1075.39		635.537		957.167		1723.58		622.353		1259.63		946.407		1632.91		1493.78		1018.38
	501.56		749.834		1173.05		749.834		1351.47		748.027		479.27		1257.52		910.579		978.091		929.123		2220.56		794.625		998.764
	1041.2		1325.89		927.177		1325.89		1068.63		436.825		756.965		1833.95		942.858		601.429		821.181		1078.72		696.642		945.555
	839.042		651.248		867.654		651.248		692.734		1166		1053.2		1302.21		844.646		879.794		1076.21		1566.81		603.924		1155.98
	1002.86		1490		1293.24		1490		1350.33		1394.37		527.804		1175.53		940.569		947.373		628.992		754.17		652		1579.25
	901.274		1476.47		1164.47		1476.47		1413.4		1060.71		1003.64		2068.67		433.14		905.851		725.945		571.559		1471.01		1241.02
	918.398		638.49		1166.64		638.49		1077.33		1358.14		663.332		1202.01		880.932		1360.05		1075.07		1332.08		1027.45		961.791
	1042.86		1385.42		1031.57		1385.42		761.641		1233.36		1127.61		1170.02		955.221		1102.66		827.934		999.063		1638.58		897.811
	1390.06		1439.16		1289.23		1439.16		879.767		1077.02		854.605		1494.57		593.965		506.734		561.457		510.548		629.106		1289.57
	894.757		1618.55		851.514		1618.55		1045.28		1384.83		992.766		1621.68		1003.07		1135.7		474.92		831.494		1373.25		1261.28
	1134.87		1199.85		1235.66		1199.85		1085		1317.04		912.868		1692.22		1028.94		866.66		810.65		1312.81		1173.85		1620.56
	1400.02		732.63		1122.11		732.63		872.9		2041.98		520.707		1408.77		1109.86		1057.53		926.49		1557.91		1729.93		1066.12
	800.579		1728.93		1409.08		1728.93		557.209		527.495		902.223		1835.22		862.961		1088.04		488.885		1157.52		621.552		1480.06
	1051.55		1760.44		1525.03		1760.44		1008.65		1363.23		839.495		825.986		911.266		1150.74		1041.99		1394.16		1016		1271.4
	1090.53		1557.66		717.703		1557.66		969.621		1391.4		533.527		1519.36		844.074		1070.46		676.953		1822.72		1195.37		1466.72
	609.028		1308.3		1201.44		1308.3		652.557		1237.6		525.4		1816.15		821.753		558.001		1011.08		2252.77		856.093		1456.43
	1186.49		1045.59		910.579		1045.59		1230.26		1370.43		906.115		533.215		603.123		637.655		975.252		1407.71		942.744		1490.19
	1051.68		1429.31		1344.86		1429.31		888.81		750.569		839.038		868.99		817.175		1136.55		886.541		1494.57		1095.67		1488.58
	927.598		944.494		1087.43		944.494		916.739		966.651		475.378		1851.32		1039.93		1081.9		541.998		1817		1045.31		1638.24
	897.568		1389.1		1356.08		1389.1		716.199		1564.9		780.316		1101.6		938.28		984.87		631.51		856.28		1290.84		1440.52
	1020.37		1198.88		1429		1198.88		779.841		1288.87		976.168		2097.27		972.391		1025.76		671.917		1599.86		675.236		1096.5
	831.886		535.071		753.989		535.071		1029.49		1062.19		685.309		1733.74		760.857		895.471		939.081		1253.91		1267.6		2030.16
	1067.52		1240.64		1541.17		1240.64		730.621		1077.87		897.072		1571.89		712.323		1000.76		1012.22		2066.98		1119.37		2479.31
	1137.81		1422.35		1732.1		1422.35		944.439		1052.87		966.896		865.389		1342.8		860.94		1023.56		954.788		937.822		1923.74
	1055.13		1213.38		1034.66		1213.38		1040.59		2137.31		662.874		1870.6		1039.58		1451.99		548.064		2031.6		525.057		1418.98
	1273		749.641		1888.69		749.641		604.139		1222.14		1053.66		1446.27		1066.14		962.626		887.571		1969.95		1337.31		2176.77
	1221.38		1105.71		1904.72		1105.71		606.199		1782.04		997.115		2174.59		994.712		967.71		592.706		2589.18		1290.95		2046.24
	1430.56		1319.7		1382.87		1319.7		936.427		1533.55		843.845		1744.76		1186.33		933.391		997.573		1690.1		538.793		1658.98
	963.634		1041.34		1469.29		1041.34		886.177		973.006		1197.09		1134.22		883.336		1148.84		1340.29		1468.09		1495.5		1813.95
	1495.86		1445.16		1886.86		1445.16		880.454		850.983		1331.36		1488.21		847.279		808.403		1192.28		1826.11		1400.61		1191.67
	367.129		1357.78		2032.92		1357.78		884.117		1306.88		1069.69		1779.71		742.771		1102.23		1038.78		1116		1568.87		1281.05
	1343.03		1243.34		1207.16		1243.34		590.289		1447.12		1216.55		1999.61		954.992		1328.27		597.972		1734.8		575.078		1485.85
	1049.89		1346.57		1418.01		1346.57		702.12		638.714		684.279		851.619		943.889		874.075		890.891		1349.24		915.959		1644.03
	1410.5		1043.66		1342.8		1043.66		990.454		936.357		691.834		2026.09		960.028		1171.72		1674.64		1045.25		1582.15		1512.86
	995.325		1199.85		1273.67		1199.85		572.776		1657.06		1421.21		1771.66		914.242		1130.41		927.634		1358.99		852.888		1638.08
	1537.52		1009.25		680.731		1009.25		815.668		1145.66		1056.64		955.423		746.205		619.013		1008.22		689.345		603.237		1337.15
	1068.67		671.352		863.762		671.352		992.285		1008.6		772.418		2129.89		691.72		1145.24		618.003		1097.78		1342.69		1800.93
	930.793		957.059		1441.24		957.059		775.606		899.92		1194.11		1860.64		887.8		1024.06		1008.79		1614.05		954.42		1437.78
	1214.35		1331.3		915.73		1331.3		587.198		816.876		1153.82		1428.26		783.521		835.307		627.847		1282.51		1003.3		2270.17
	746.398		1230.2		1817.27		1230.2		850.236		1493.93		545.432		1961.05		930.496		1223.41		456.835		925.553		690.346		2194.13
	1320.41		967.304		1782.35		967.304		672.474		1548.8		1272.98		1861.06		932.9		978.303		912.181		1505.59		758.911		1863.14
	1059.09		2024.3		1581.81		2024.3		917.769		757.136		1108.49		1094.18		977.885		1019.19		831.712		1083.8		1611		1292.14
	1298.31		1327.05		2253.73		1327.05		606.543		2588.12		986.928		2069.73		713.239		1048		700.19		1583.97		1303.31		1685.18
	1178.06		1513.39		958.884		1513.39		1025.37		1275.52		675.236		1691.8		952.13		692.523		1060.53		1587.57		919.507		999.246
	1145.98		716.779		1210.48		716.779		1174.4		1134.01		971.132		1105.62		767.153		406.532		908.748		688.498		1292.78		1439.39
	1063.05		1161		704.425		1161		505.242		3005.03		839.381		1740.1		1014.29		1014.53		1005.93		978.091		1010.51		1817.16
	798.151		1324.53		1172.02		1324.53		874.617		1314.29		964.149		1108.59		1175.11		1193.11		573.705		1675.49		1167.9		1515.27
	999.158		1138.38		1086.63		1138.38		1024.22		1034.23		1588.91		1900.25		1067.4		988.471		824.042		1424.66		720.222		1278.48
	984.846		553.629		1194.57		553.629		1351.93		1436.31		885.854		1088.89		824.615		631.935		605.641		1395		968.155		1264.17
	1321.69		1085.22		972.276		1085.22		717.115		1127.23		1117.08		1584.18		971.361		1250.74		616.744		1243.96		1000.32		2002.99
	1198.89		1191.73				1191.73		684.492		851.407		744.717		774.719		1095.44		800.352		1091.78		1325.52		1126.81		1257.9
	836.87		683.144				683.144		1120.83		2945.29		830.682		1586.09		1041.64		1341.41		984.639		1750.48		781.804		1555.46
	1121.83		1325.89				1325.89		763.701		1211.54		884.137		1224.04		812.481		1230.19		1058.81		824.291		889.403		1316.57
	338.505		1213.58				1213.58		1000.87		1391.83		1060.3		1495.63		1253.41		881.066		1033.63		1452.84		728.921		1721.84
	399.331		476.5				476.5		1186.19		527.495		794.739		1964.66		1435.52		1222.56		769.442		1489.06		1199.15		987.029
	922.87		941.014				941.014		1011.52		1760.22		1277.56		1161.76		798.059		886.362		961.974		874.498				1129.62
	1001.2		916.078				916.078		623.712		1450.08		1362.49		1583.12				1067.28		887.686						1601.91
	678.16		1277.37				1277.37		1229.68		1910.21		1443.76		2113.37				1037.83		965.065						746.22
	825.114		1373.25				1373.25		1156.31		1103.08		980.289		2550.41				1251.58		944.347						1023.36
	585.132		728.377				728.377		1174.74		1476.78		718.39						882.972		467.938						1506.1
			1069.18				1069.18		1082.71		1506.65		964.836						987.624		545.775
			1278.33				1278.33		881.828		857.763		1312.81						1066.01		1151.99
			2063.16				2063.16		1122.09		560.967		1073.35						1009.02		1082.39
			1106.87				1106.87		704.18		1040.59		824.042						982.963		641.354
			1219.95				1219.95		1077.22				1501.91						1045.67		1000.89
			534.878				534.878		747.447				1013.14						1021.73		733.156
			1090.83				1090.83		779.154				753.646						1087.61		939.653
			1197.53				1197.53		1083.4				1057.32						1275.73		786.269
			1140.12				1140.12		870.038				1034.89						1186.55		802.523
			1207				1207		814.752				1065.22						1159.85		692.292
			1329.56				1329.56		1048.83										853.526		1024.24
			1159.84				1159.84		1173.25										625.58		1078.04
			1193.86				1193.86		980.839										1025.54		627.389
			1326.08				1326.08		997.093										973.218		824.958
			1151.33				1151.33		1094.96										1171.51		1094.98
			1120.21				1120.21		1463.53										934.027		895.355
			1206.04				1206.04		1248.68										953.729		914.356
			1102.23				1102.23		1082.83										930.214		987.042
			971.943				971.943		911.359										1028.3		939.424
			1291.86				1291.86		1042.88										689.557		1022.53
			899.26				899.26		1103.43										797.598		1043.82
			840.108				840.108		1363.83										1103.29		640.896
			1382.72				1382.72		1157.91										982.54		524.828
			1516.49				1516.49		1082.02										1015.38		603.695
			1237.16				1237.16												1171.51		1081.71
			1122.34				1122.34												703.539		1011.08
			744.229				744.229												1435.47		792.106
			870.844				870.844												679.389		961.288
			1305.2				1305.2												802.471		645.132
			639.457				639.457												1093.76
			1048.49				1048.49												1079.78
			500.47				500.47												1158.58
			1237.55				1237.55												1106.47
			1241.22				1241.22												931.061
			1224.4				1224.4												1139.31
			901				901												917.927
			861.952				861.952												814.334
							500.276												1218.54
							769.745												796.115
							838.949												872.168
							1238.51												1018.77
							804.733												911.995
							1021.24												1013.26
							941.401												961.991
							640.616												527.495
							1051.59												1106.26
							1559.59												1002.03
							1473.77												875.558
							836.242												919.833
							1549.54												1031.9
							716.779												1089.73
							1393.93												1376.36
							1409.78												853.737
							736.11												588.083
							999.586
							1253.2
