# Supplementary material for: Fecal transplant from myostatin deletion pigs positively impacts the gut-muscle axis
Source: eLife journal article supplement (doi:10.7554/elife.81858), 2023-04-11
Supplement: fig8-data1 [file fig8.c.xlsx]

## Sheet: fig8.c
GPR43-KD	Sample	Ct (dR)			ΔΔCT	average	fold		test
	C1	32.05
		32.57	32.31	15.91	1.1564e-05		0.540626
	C2	31.04
		31.22	31.13	15.455	1.91141e-05		0.893602
	C3	30.5
		30.44	30.47	15.1	2.3614e-05		1.10397
	C4	29.91
		29.82	29.865	14.9	3.1267e-05	2.13898e-05	1.46176	0.99999
	K1	32.5
		32.69	32.595	15.78	8.67323e-06		0.40548
	K2	31.97
		31.94	31.955	15.14	8.67323e-06		0.40548
	K3	33.26
		33.2	33.23	15.95	6.2835e-06		0.293759
	K4	32.4
		32.19	32.295	15.815	1.09402e-05	8.64254e-06	0.511464	0.404046	0.0236702
	Con	0.540626
		0.893602
		1.10397
		1.46176
	KD	0.40548
		0.40548
		0.293759
		0.511464
	Avg.	0.99999
	Avg.	0.404046
	Ttest	0.0236702
