# Supplementary material for: Fecal transplant from myostatin deletion pigs positively impacts the gut-muscle axis
Source: eLife journal article supplement (doi:10.7554/elife.81858), 2023-04-11
Supplement: fig8-data1 [file fig8.d.xlsx]

## Sheet: fig8.d
fig-43KD	akt				mTOR				43KD
1	24642.9			1	23784.7			1	11879.6
2	24083.1			2	20549.2			2	10102.7
3	24106.3			3	24630.7			3	11059.1
4	21707.8			4	23078.1			4	11244.6
1	26023.2	25333.1		1	24539.4	24162.1		1	12218.8	12049.2
2	25173.4	24628.2		2	21482.7	21016		2	10231.8	10167.3
3	25230.2	24668.3		3	25623.8	25127.3		3	11894	11476.5
4	22752.8	22230.3		4	24797.9	23938		4	12891.3	12067.9
	p-akt				p-mtor				act
1	14311.3			1	15784.4			1	28488.6
2	10619.6			2	17602			2	26011.5
3	14466.6			3	18367.9			3	26223.9
4	15543.8			4	19495			4	23063.9
1	13294.9	13803.1		1	16317.4	16050.9		1	27568.3	28028.5
2	9979.1	10299.4		2	18536.9	18069.4		2	24601.2	25306.3
3	13626.5	14046.6		3	18855.4	18611.7		3	25266.9	25745.4
4	15387.9	15465.9		4	20964.9	20230		4	22968.1	23016
	p-akt/akt				pmtor/mtor					GPR43
GPR43KD	0.544865		1.13153		0.664304		0.871732			0.429892		1.03382
	0.418194	0.481529	0.86847		0.859797	0.76205	1.12827			0.401767	0.41583	0.966181
GPR43KD+Val	0.569419		1.18252		0.740696		0.971979			0.44577		1.072
	0.695711	0.632565	1.4448		0.8451	0.792898	1.10898			0.524328	0.485049	1.26092
ttest			0.233325				0.806862					0.23896
