# Supplementary material for: Fecal transplant from myostatin deletion pigs positively impacts the gut-muscle axis
Source: eLife journal article supplement (doi:10.7554/elife.81858), 2023-04-11
Supplement: fig8-data1 [file fig8.e.xlsx]

## Sheet: fig8.e
Replicate	Ct (dR)			ΔΔCT	average	fold		SE	errorbar	test
Con1	28.64
	28.9	28.77	16.595	0.000216252		1.00911
Con2	28.56
	28.72	28.64	16.455	0.000214758		1.00214
Con3	27.59
	27.18	27.385	15.295	0.000229376		1.07035
Con4	28.94
	28.9	28.92	16.61	0.000196934	0.00021433	0.918964	1.00014	0.0310955	0.0310912
Acetic1	27.53
	27.88	27.705	14.845	0.00013451		0.627671
Acetic2	27.63
	27.25	27.44	15.235	0.000211801		0.988341
Acetic3	29.49
	29.15	29.32	16.115	0.000105901		0.49417
Acetic4	28.84
	29.13	28.985	16.295	0.000151332	0.000150886	0.706167	0.704087	0.104367	0.14823	0.0347093
Propionic1	27.95
	28.12	28.035	16.43	0.000321031		1.49804
Propionic2	28.6
	28.59	28.595	16.23	0.000189568		0.88459
Propionic3	26.48
	26.42	26.45	15.08	0.000377823		1.76306
Propionic4	26.17
	26.46	26.315	14.925	0.000372622	0.000315261	1.73879	1.47112	0.204454	0.138978	0.063023
Butyrate1	26.2
	26.15	26.175	14.99	0.000429516		2.00428
Butyrate2	27.82
	27.58	27.7	16.08	0.00031771		1.48255
Butyrate3	27.52
	27.56	27.54	16.08	0.000354974		1.65643
Butyrate4	28.14
	28.16	28.15	15.965	0.000214758	0.00032924	1.00214	1.53635	0.208497	0.135709	0.0438643
Valeric1	28.08
	28.41	28.245	16.7	0.000334664		1.56166
Valeric2	27.75
	27.92	27.835	16.51	0.000389794		1.81892
Valeric3	26.73
	26.51	26.62	15.49	0.000446207		2.08216
Valeric4	26.65
	26.8	26.725	15.555	0.000434005	0.000401167	2.02522	1.87199	0.117889	0.062975	0.000377102
	Con	1.00911
		1.00214
		1.07035
		0.918964
	Acetic	0.627671
		0.988341
		0.49417
		0.706167
	Propionic	1.49804
		0.88459
		1.76306
		1.73879
	Butyrate	2.00428
		1.48255
		1.65643
		1.00214
	Valeric	1.56166
		1.81892
		2.08216
		2.02522
Avg	Con	1.00014
	Acetic	0.704087
	Propionic	1.47112
	Butyrate	1.53635
	Valeric	1.87199
errorbar		0.0310912
		0.0853096
		0.138978
		0.135709
		0.062975
