# Supplementary material for: Fecal transplant from myostatin deletion pigs positively impacts the gut-muscle axis
Source: eLife journal article supplement (doi:10.7554/elife.81858), 2023-04-11
Supplement: fig8-data1 [file fig8.f.xlsx]

## Sheet: fig8.f
	p-akt			akt			p-mTOR			mtor			myod			myog			act
1	10997.1		1	20122.1		1	10330.4		1	18426.7		1	15054		1	18153.7		1	24602.4
2	12902.7		2	21609.9		2	7866.03		2	18561.8		2	16127.7		2	15599		2	26575.3
3	16010.8		3	22783.5		3	7769.08		3	22790.6		3	12173.9		3	15817		3	24792.6
4	15669.1		4	21406		4	11134.9		4	18600.3		4	15217		4	15341.3		4	22746
5	13253.4		5	21849.1		5	13762.6		5	16096.8		5	16466.3		5	10740.5		5	22083.6
6	9133.25		6	23725.1		6	10466.2		6	18289.2		6	15234.2		6	9817.03		6	23677.7
7	17053.5		7	22998		7	15037		7	19655.2		7	14590.3		7	12810.9		7	22030.3
8	16063.8		8	22121.8		8	18474.2		8	19415.9		8	16347.4		8	13496.7		8	20519.5
9	18740.9		9	22224.4		9	20366.4		9	21620		9	22319.9		9	19120.4		9	20778.9
10	19656.9		10	20960.4		10	22559.2		10	21229		10	22315.3		10	21716		10	20739.3
1	9029.89		1	14293.9	17208	1	10754.4		1	12459.5	15443.1	1	11751.5		1	12656.8
2	10965.2		2	15113.1	18361.5	2	7941.45		2	12162.3	15362	2	12336.8		2	10989.8
3	12354.9		3	15919.7	19351.6	3	7552.79		3	15257.5	19024.1	3	9746.13		3	11079.4
4	12059.9		4	14898.7	18152.3	4	10821.4		4	12304	15452.2	4	11618.1		4	10902.3
5	10253.5		5	15266	18557.5	5	12626		5	10716.8	13406.8	5	12031.4		5	7646.72
6	7121.77		6	16720.9	20223	6	10738.7		6	12259	15274.1	6	11273.4		6	6924.43
7	13792.3		7	16081.7	19539.9	7	15130.3		7	12959.8	16307.5	7	11144.4		7	9251.13
8	13179.3		8	15578.9	18850.3	8	18689.4		8	12993.6	16204.8	8	11985.8		8	9546.25
9	14087.7		9	15405.8	18815.1	9	20211.7		9	14174.4	17897.2	9	15729.3		9	13485.3
10	14840		10	14922.7	17941.6	10	22069.3		10	14262.4	17745.7	10	15479.8		10	15337.7
	p-akt/akt					p-mTOR/mTOR					myod					myog
Con	0.639068		1.03757		Con	0.668933		1.11753		Con	0.611892		1.1328		Con	0.737884		1.31013
	0.702701		1.14089			0.512043		0.855431			0.606869		1.1235			0.586974		1.04219
	0.52475		0.85197			0.696388		1.1634			0.477658		0.884289			0.514455		0.91343
	0.597183	0.615925	0.96957			0.516952	0.598579	0.863633			0.464222	0.54016	0.859415			0.413536	0.563212	0.734245
C2	0.827362		1.34328		C2	0.408382		0.682252		C2	0.491028		0.909041		C2	0.637973		1.13274
	0.863199		1.40147			0.720602		1.20385			0.668997		1.23852			0.674459		1.19752
	0.638443		1.03656			0.397013		0.663258			0.393106		0.727759			0.446884		0.793456
	0.664371	0.748344	1.07866			0.700319	0.556579	1.16997			0.510776	0.515977	0.945602			0.479304	0.559655	0.851018
C3	0.714177		1.15952		C3	1.02654		1.71496		C3	0.745635		1.3804		C3	0.486356		0.86354
	0.451627		0.733251			0.685222		1.14475			0.643396		1.19112			0.41461		0.736153
	0.552523		0.897063			0.941765		1.57333			0.544812		1.00861			0.346262		0.614799
	0.352162	0.517622	0.571761			0.703068	0.839149	1.17456			0.476119	0.602491	0.881441			0.292445	0.384918	0.519244
C4	0.872754		1.41698		C4	0.922093		1.54047		C4	0.662286		1.22609		C4	0.581514		1.0325
	0.852175		1.38357			1.14005		1.90459			0.796679		1.47489			0.657752		1.16786
	0.705854		1.14601			0.927814		1.55003			0.505869		0.936517			0.419929		0.745596
	0.699155	0.782484	1.13513			1.15333	1.03582	1.92678			0.58412	0.637238	1.08138			0.465229	0.531106	0.826027
C5	0.996055		1.61717		C5	1.13797		1.90111		C5	1.07416		1.9886		C5	0.920187		1.63382
	1.09561		1.7788			1.27125		2.12377			1.07599		1.99198			1.04709		1.85915
	0.748744		1.21564			1.12932		1.88667			0.756984		1.40141			0.648989		1.1523
	0.827129	0.916883	1.34291			1.24364	1.19554	2.07765			0.7464	0.913384	1.38181			0.739545	0.838954	1.31308
Ttest			0.0989605		Ttest			0.693441		Ttest			0.74075		Ttest			0.969303
			0.295479					0.0503822					0.414629					0.0677548
			0.0312848					0.00162442					0.236522					0.725215
			0.0136169					6.45073e-05					0.0104172					0.0496497
