# Supplementary material for: Fecal transplant from myostatin deletion pigs positively impacts the gut-muscle axis
Source: eLife journal article supplement (doi:10.7554/elife.81858), 2023-04-11

Figure 8D source data

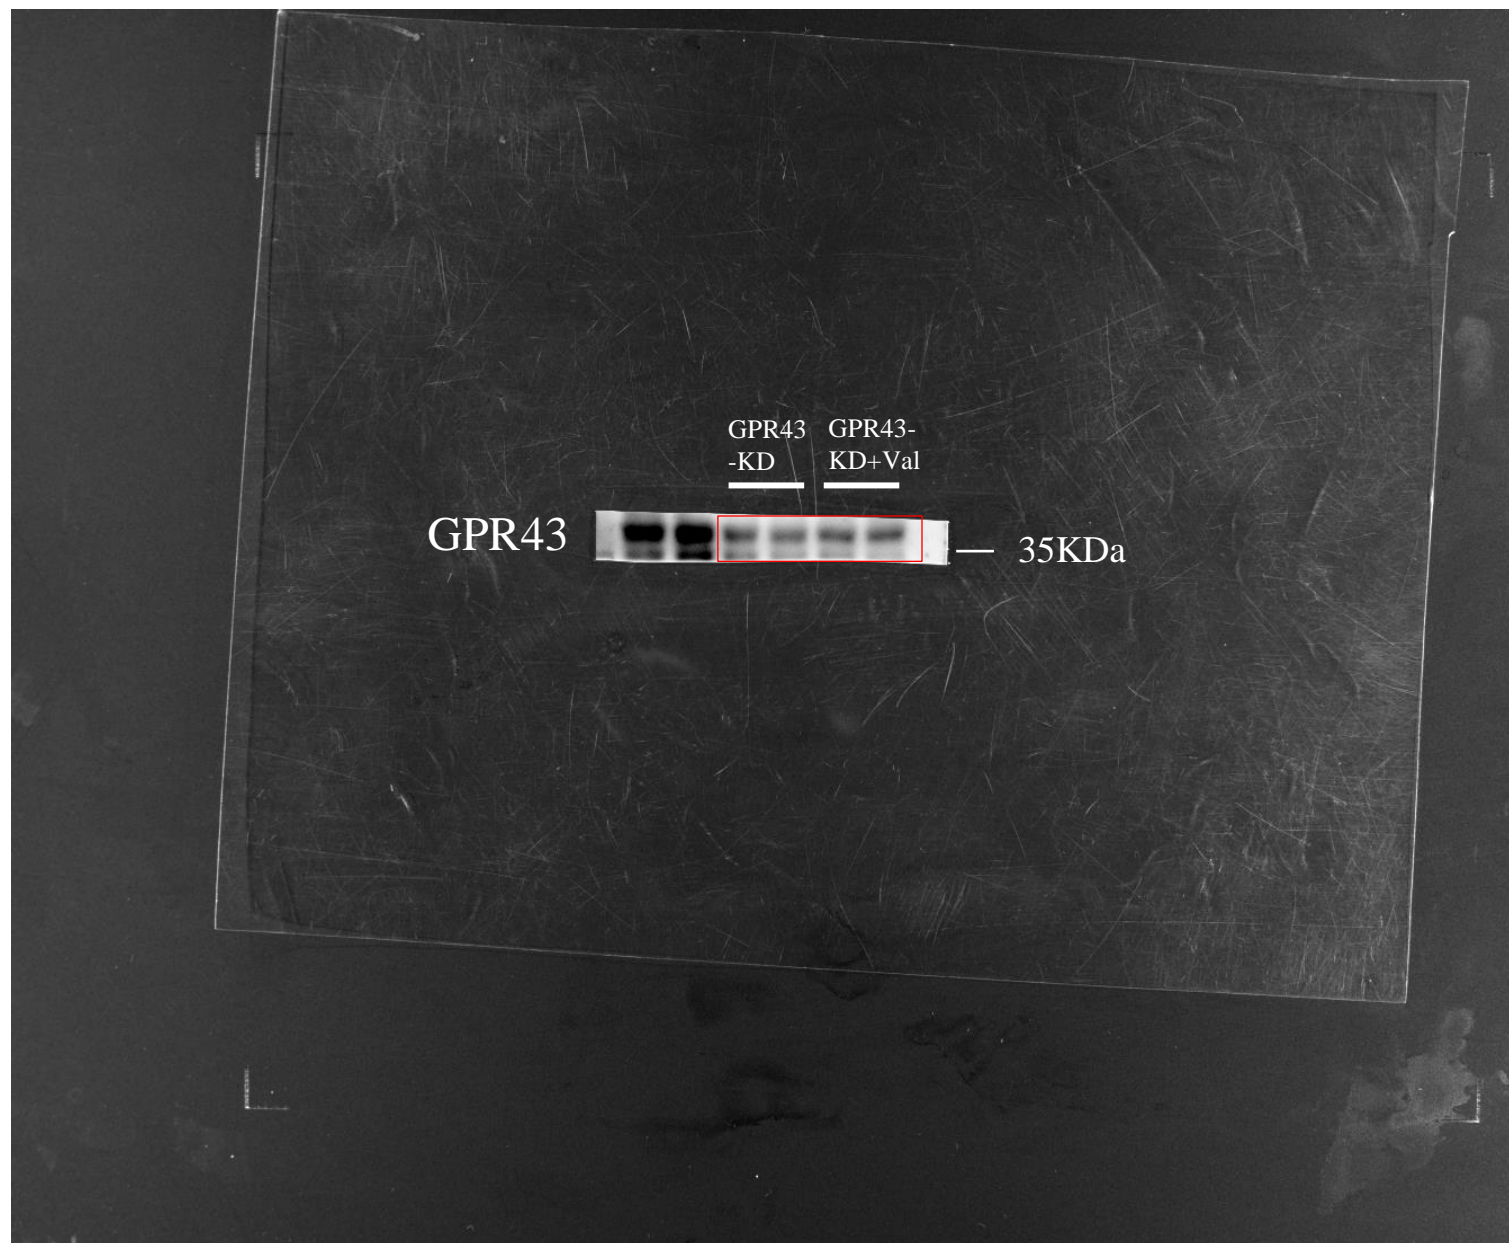

Figure 8D source data

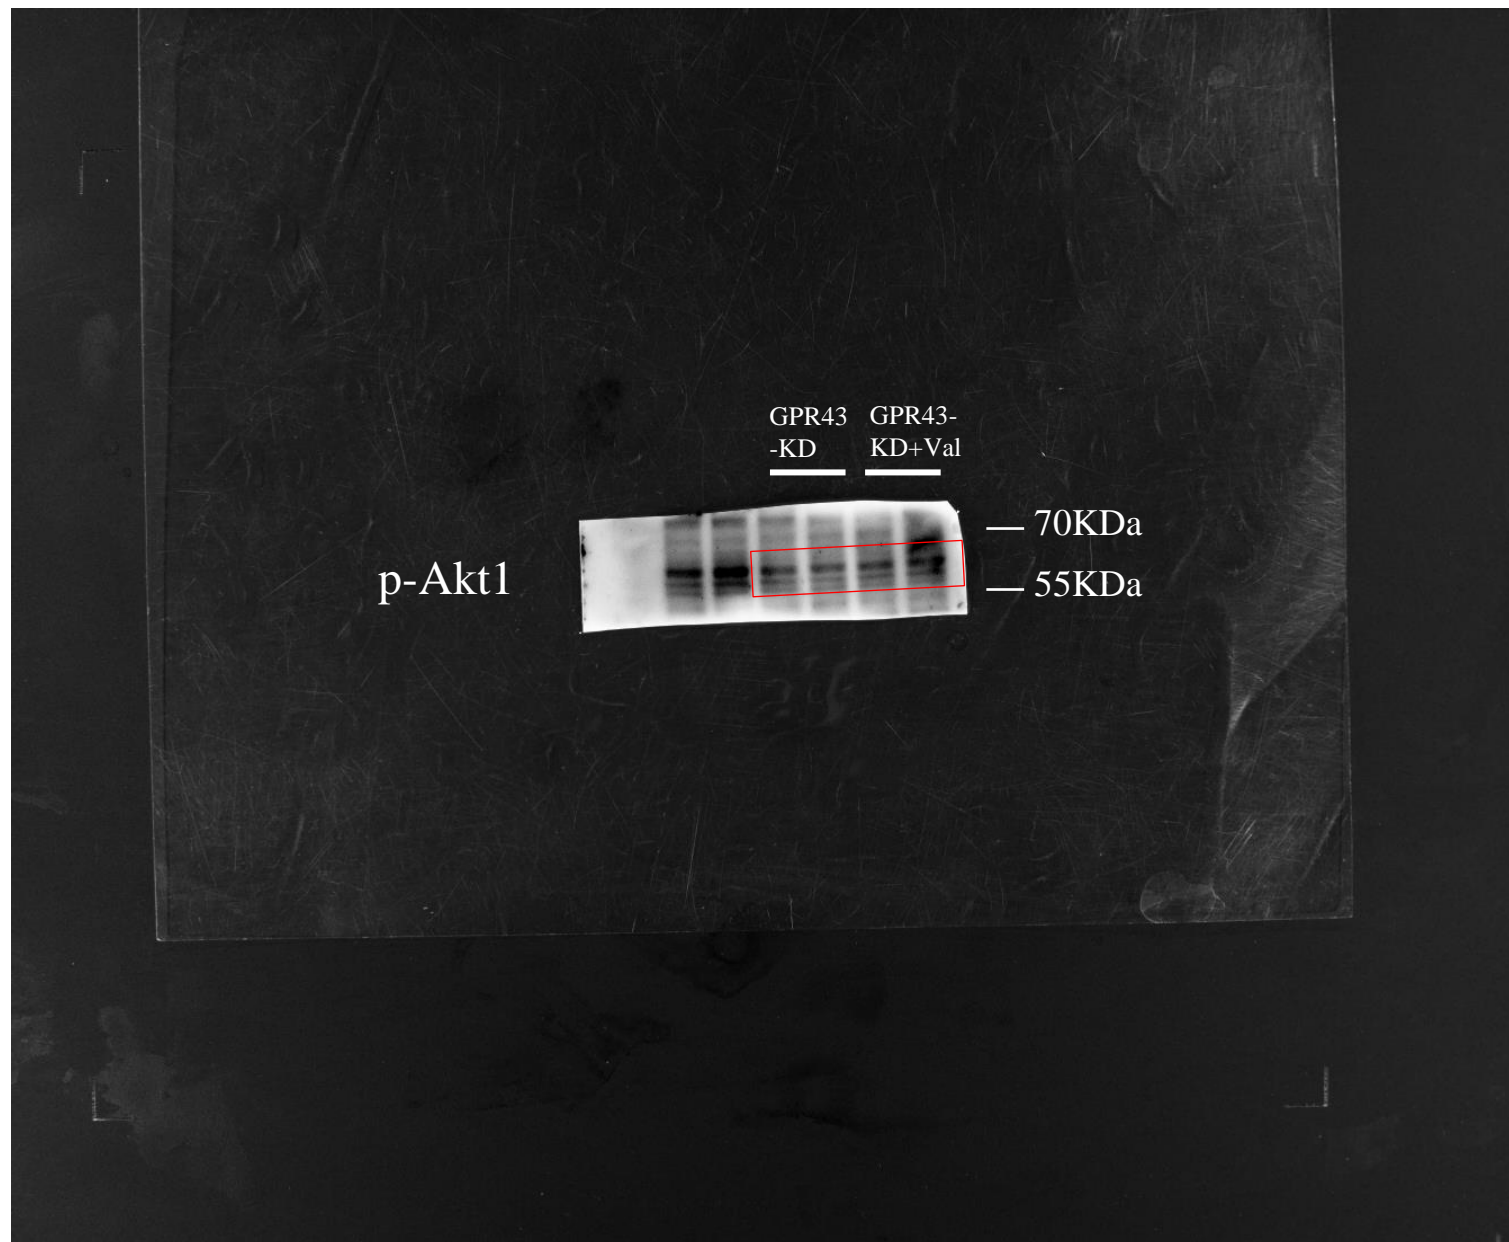

Figure 8D source data

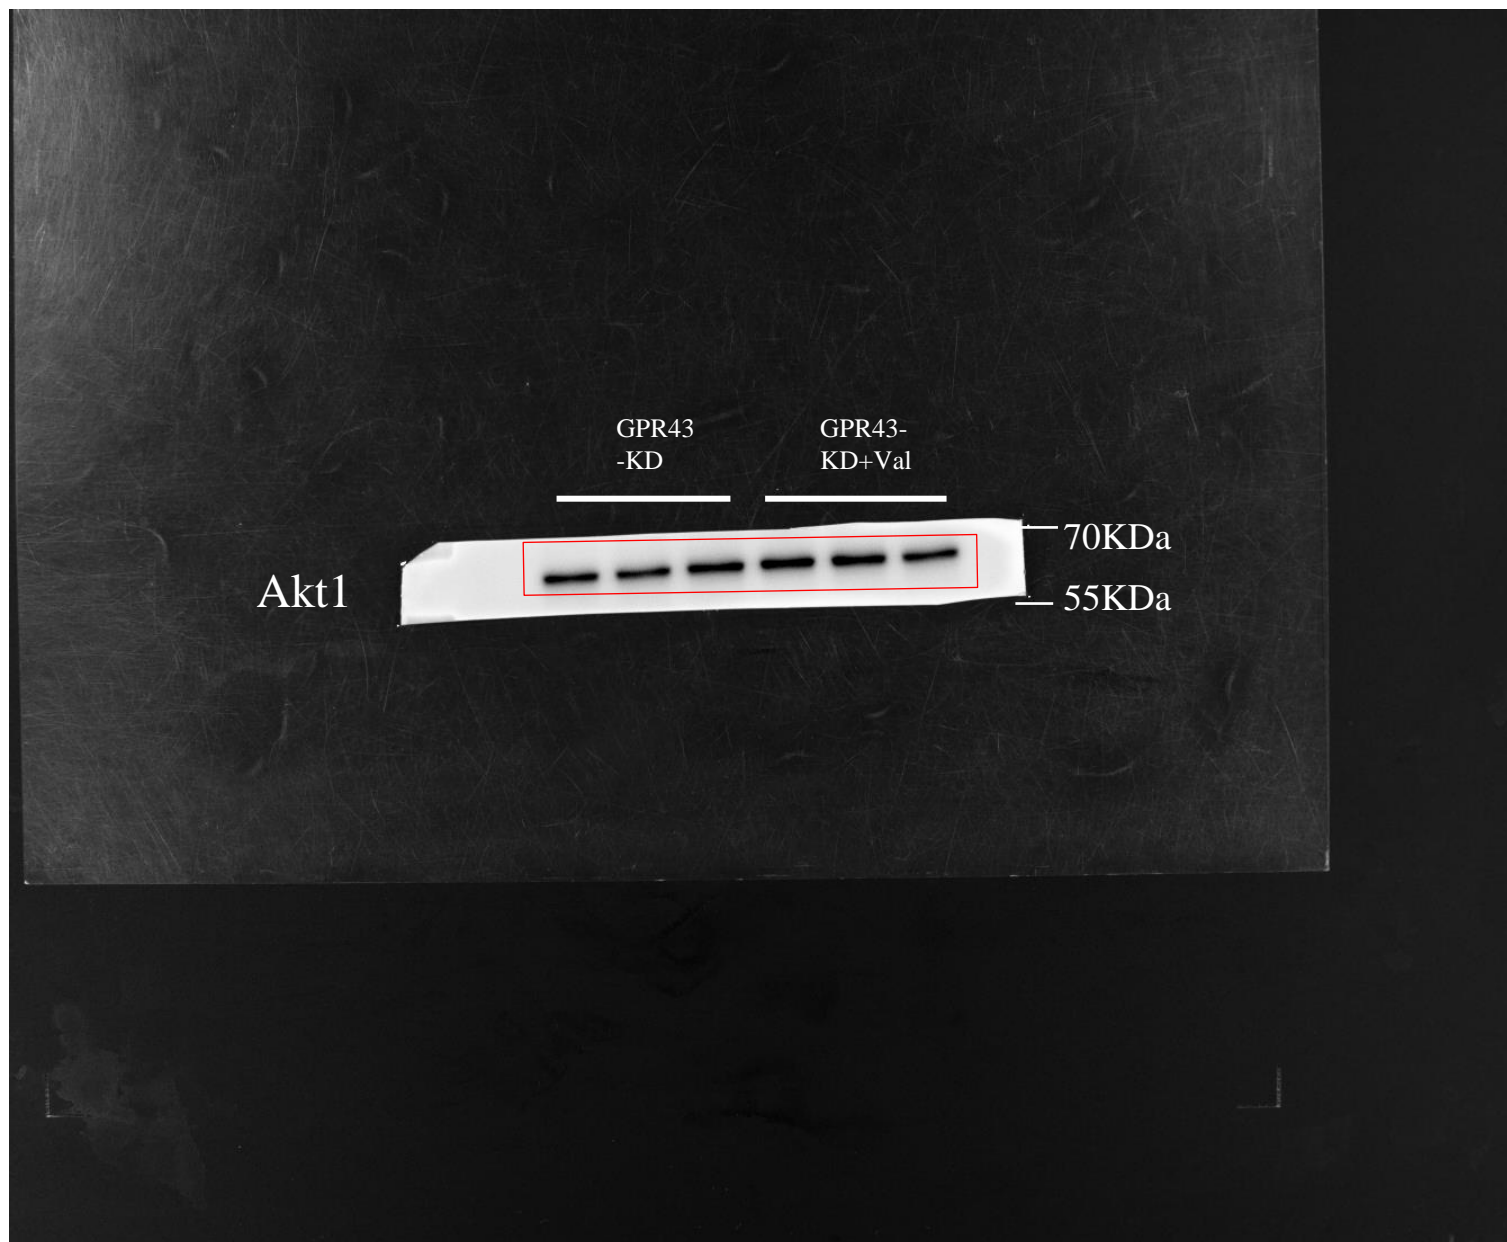

Figure 8D source data

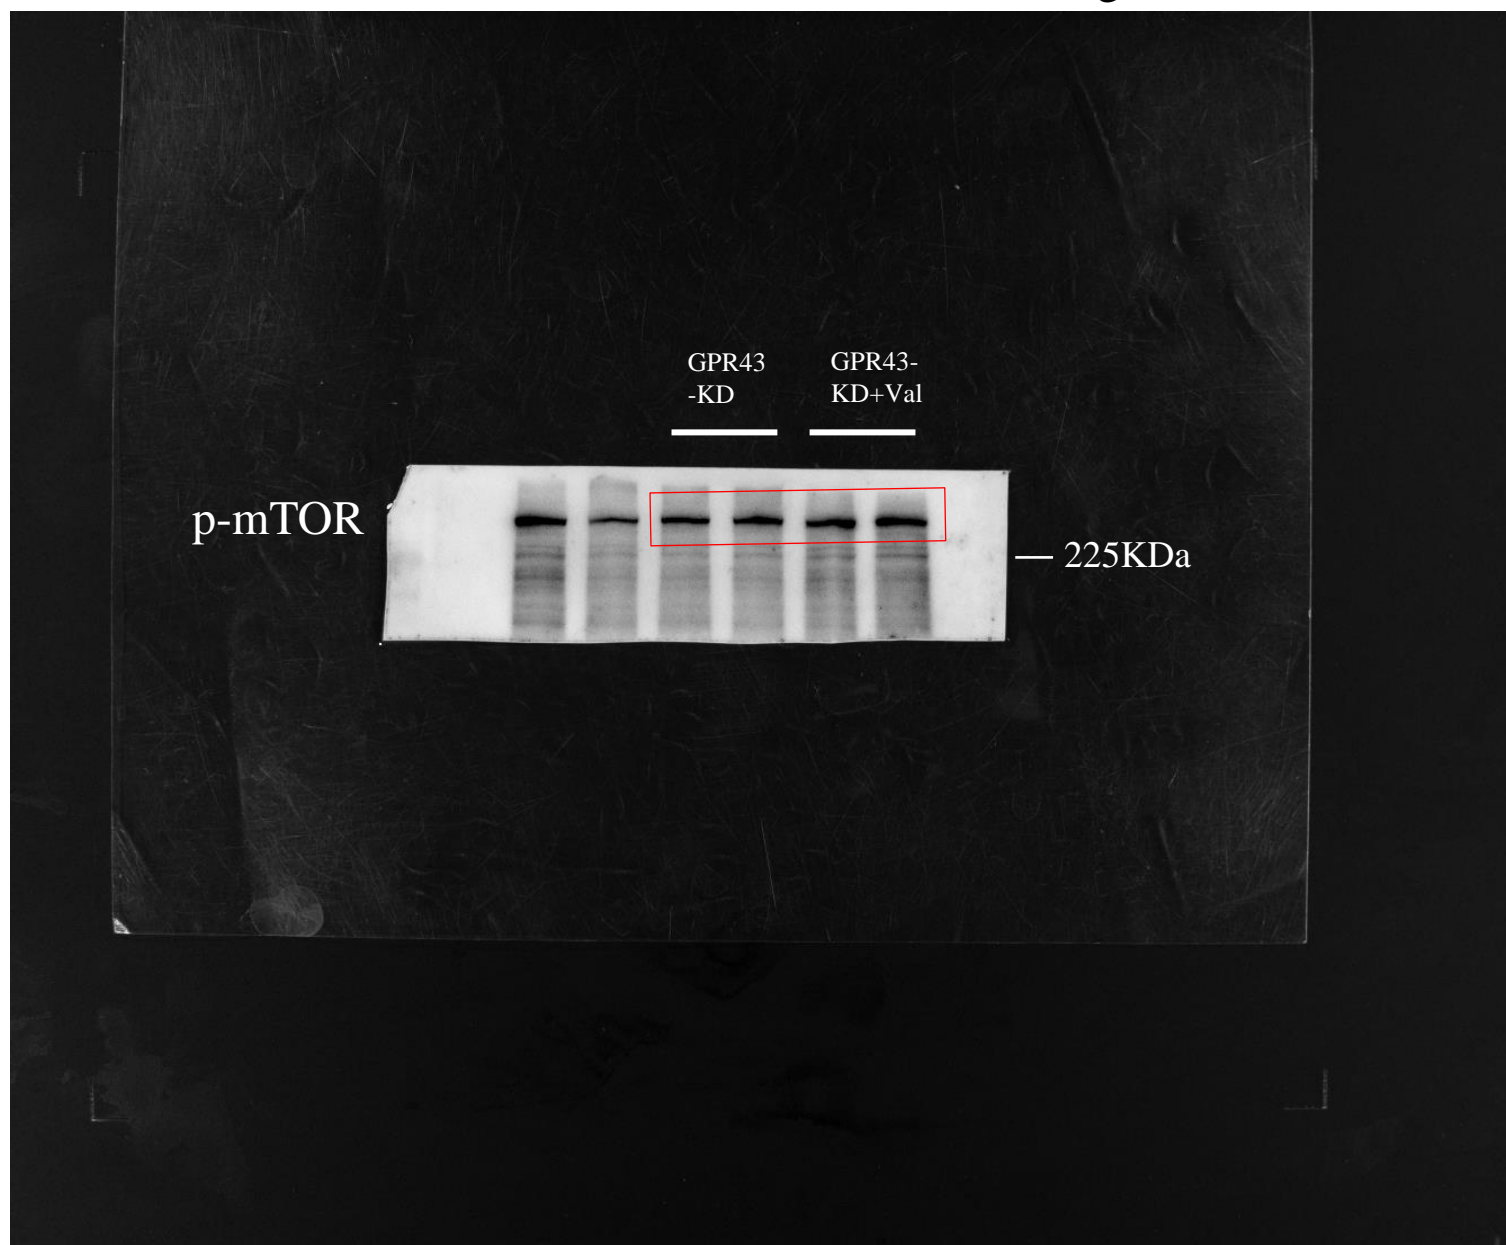



Figure 8D source data

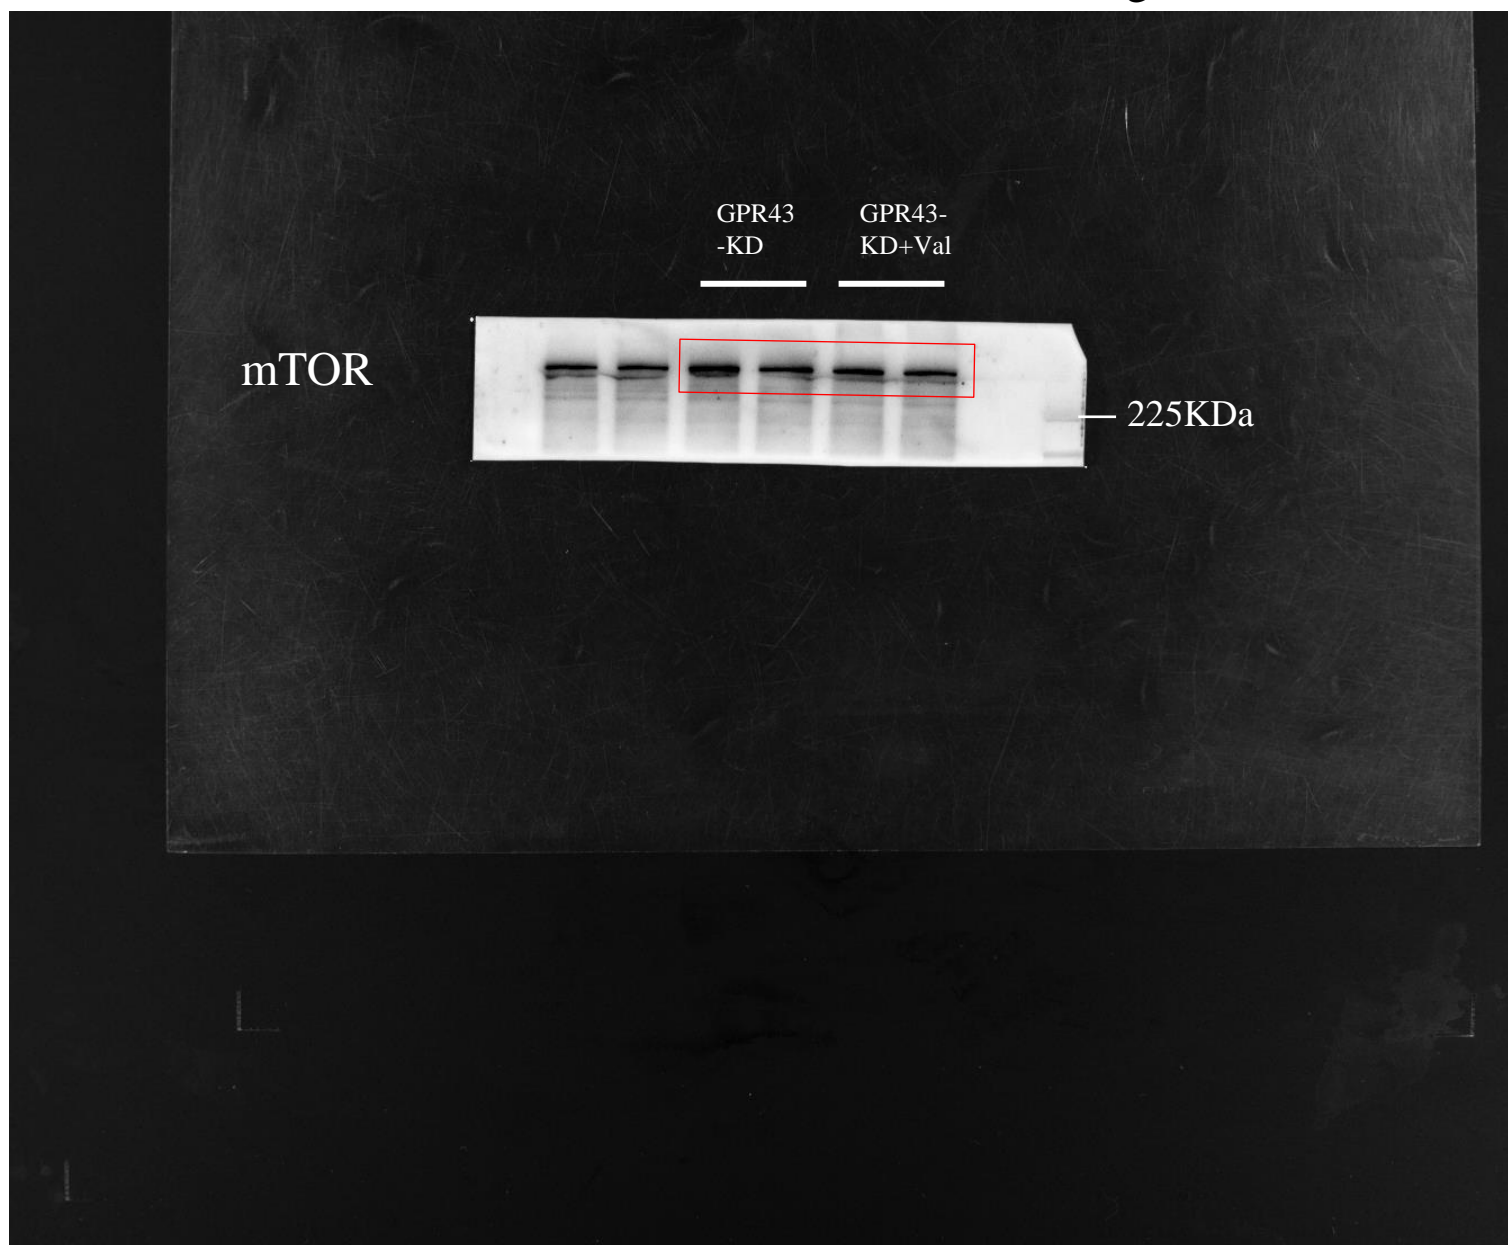

Figure 8D source data

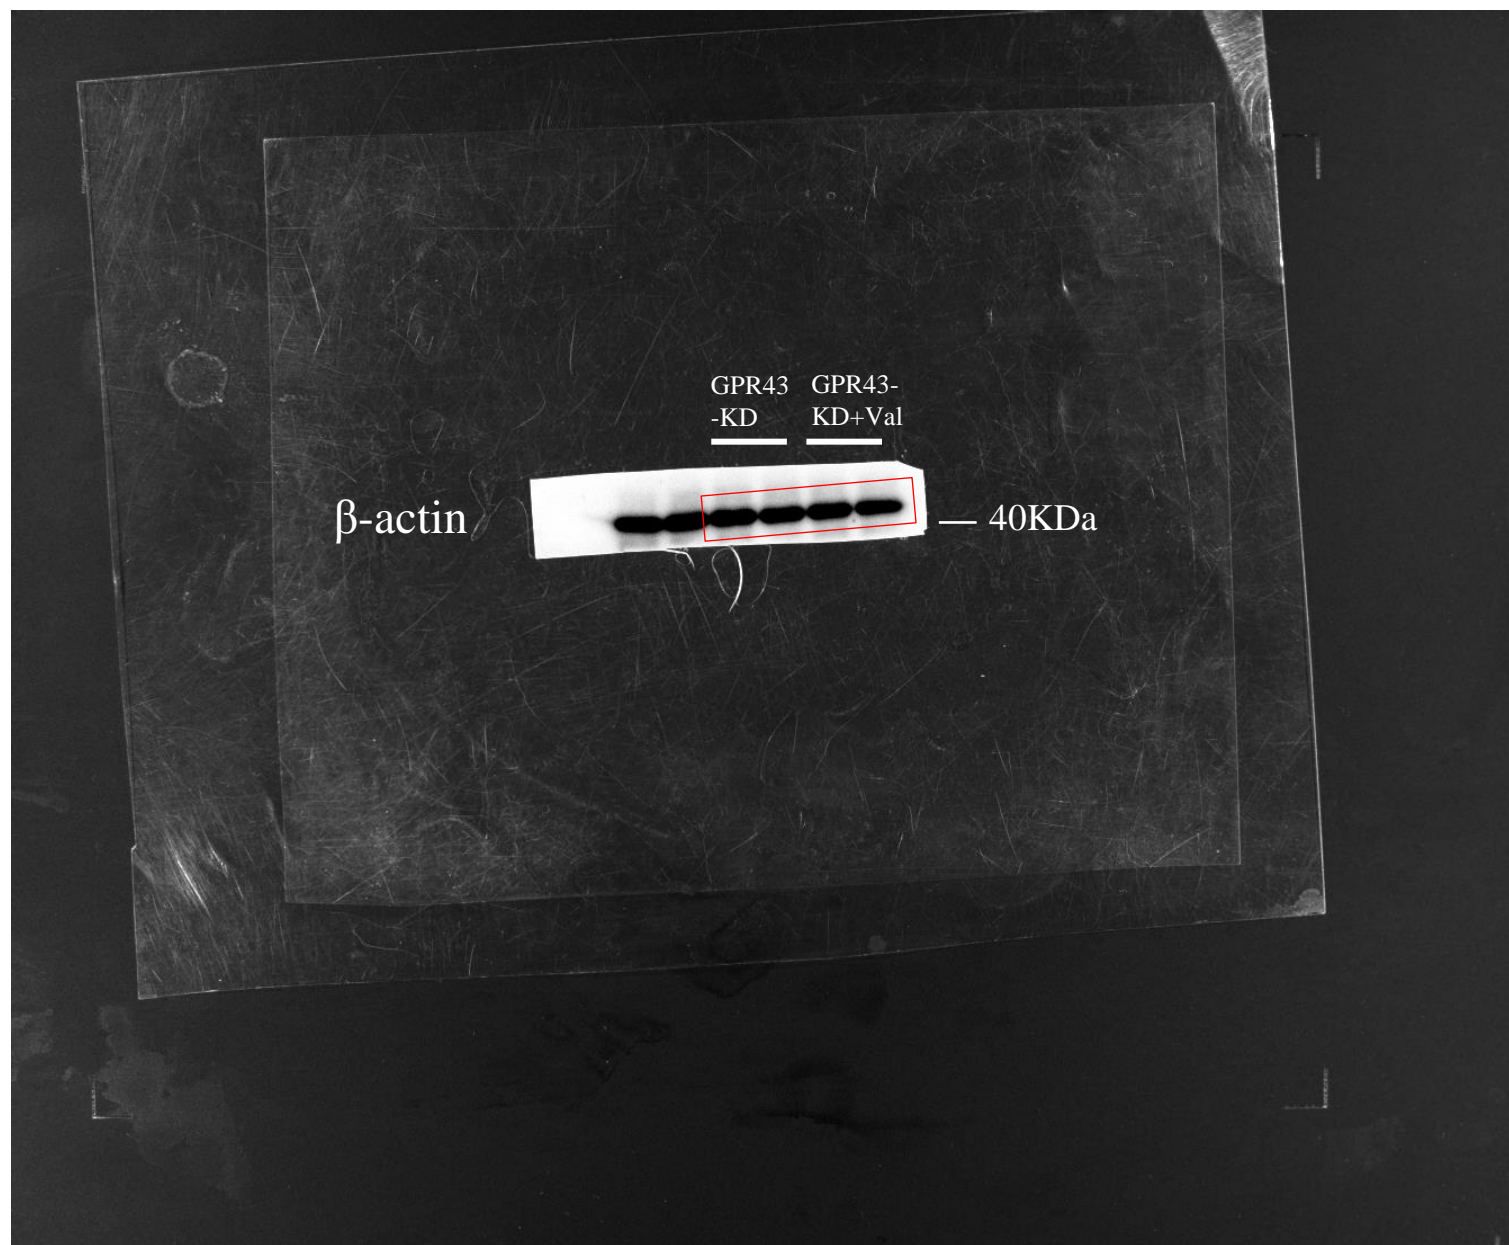

Figure 8F source data

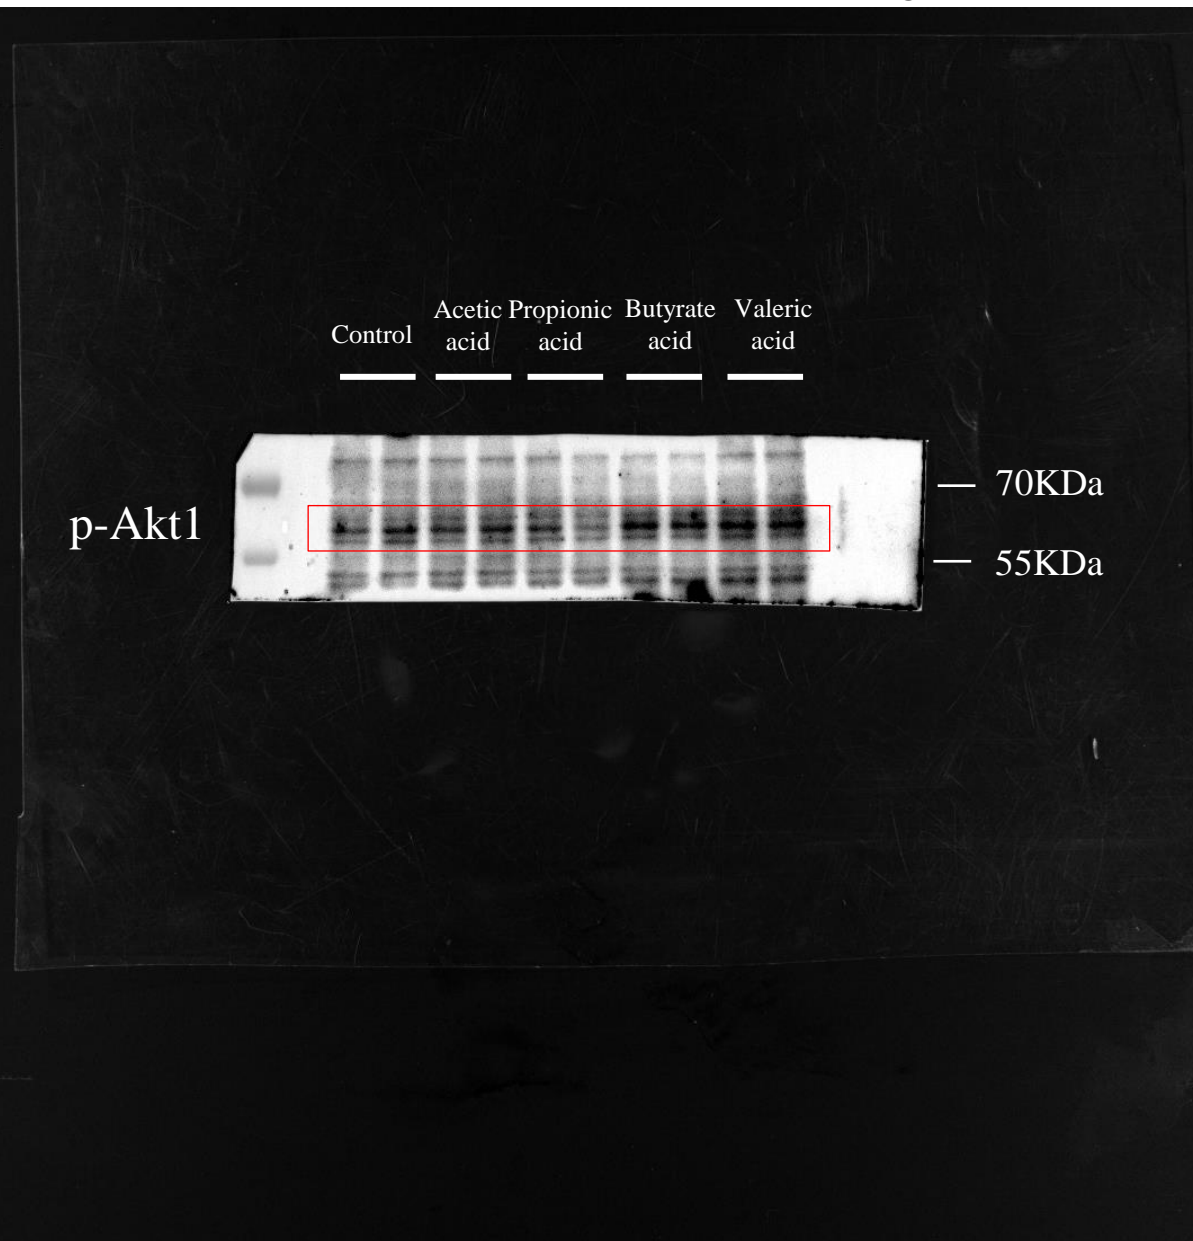

Figure 8F source data

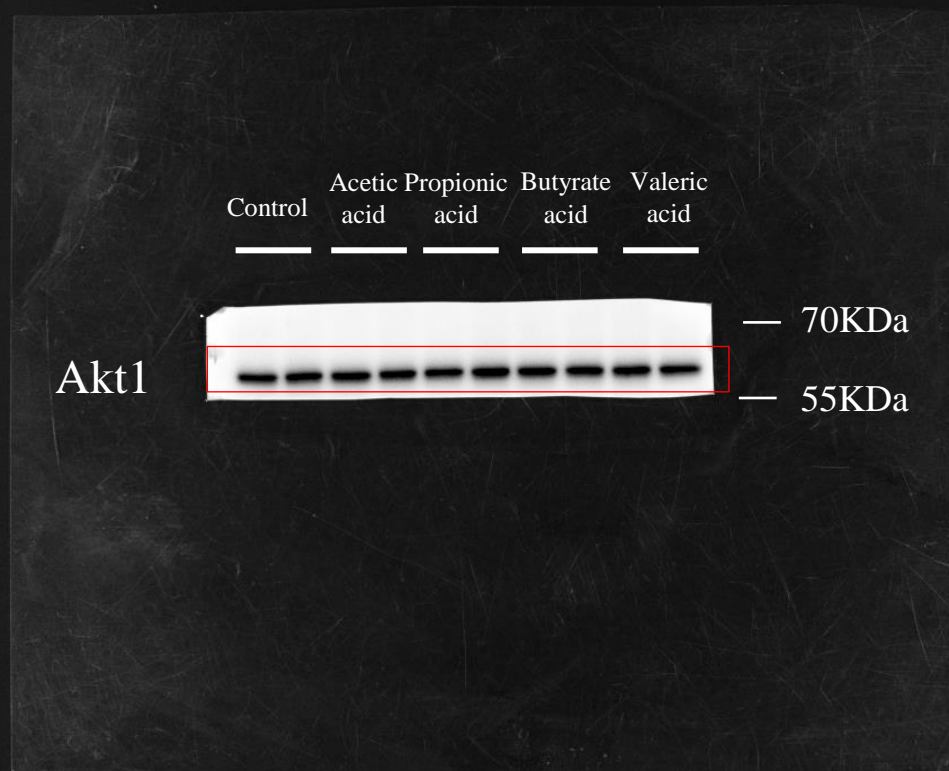



Figure 8F source data

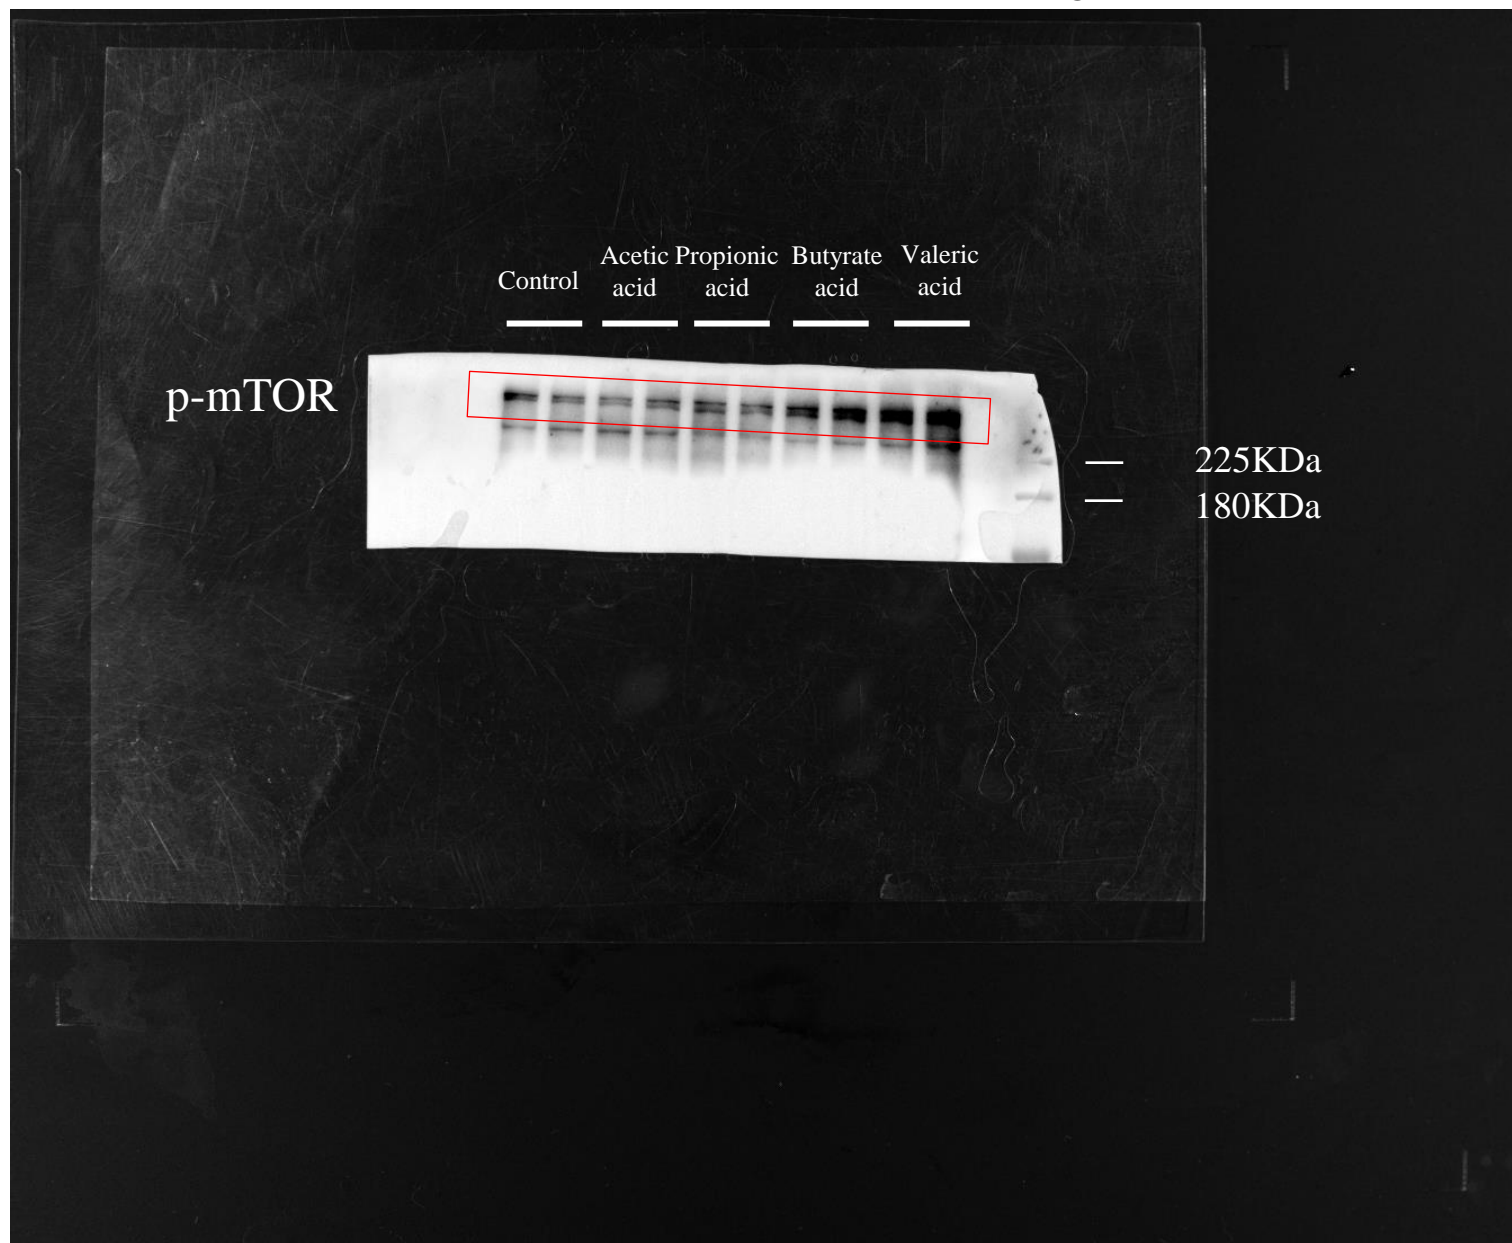

Figure 8F source data

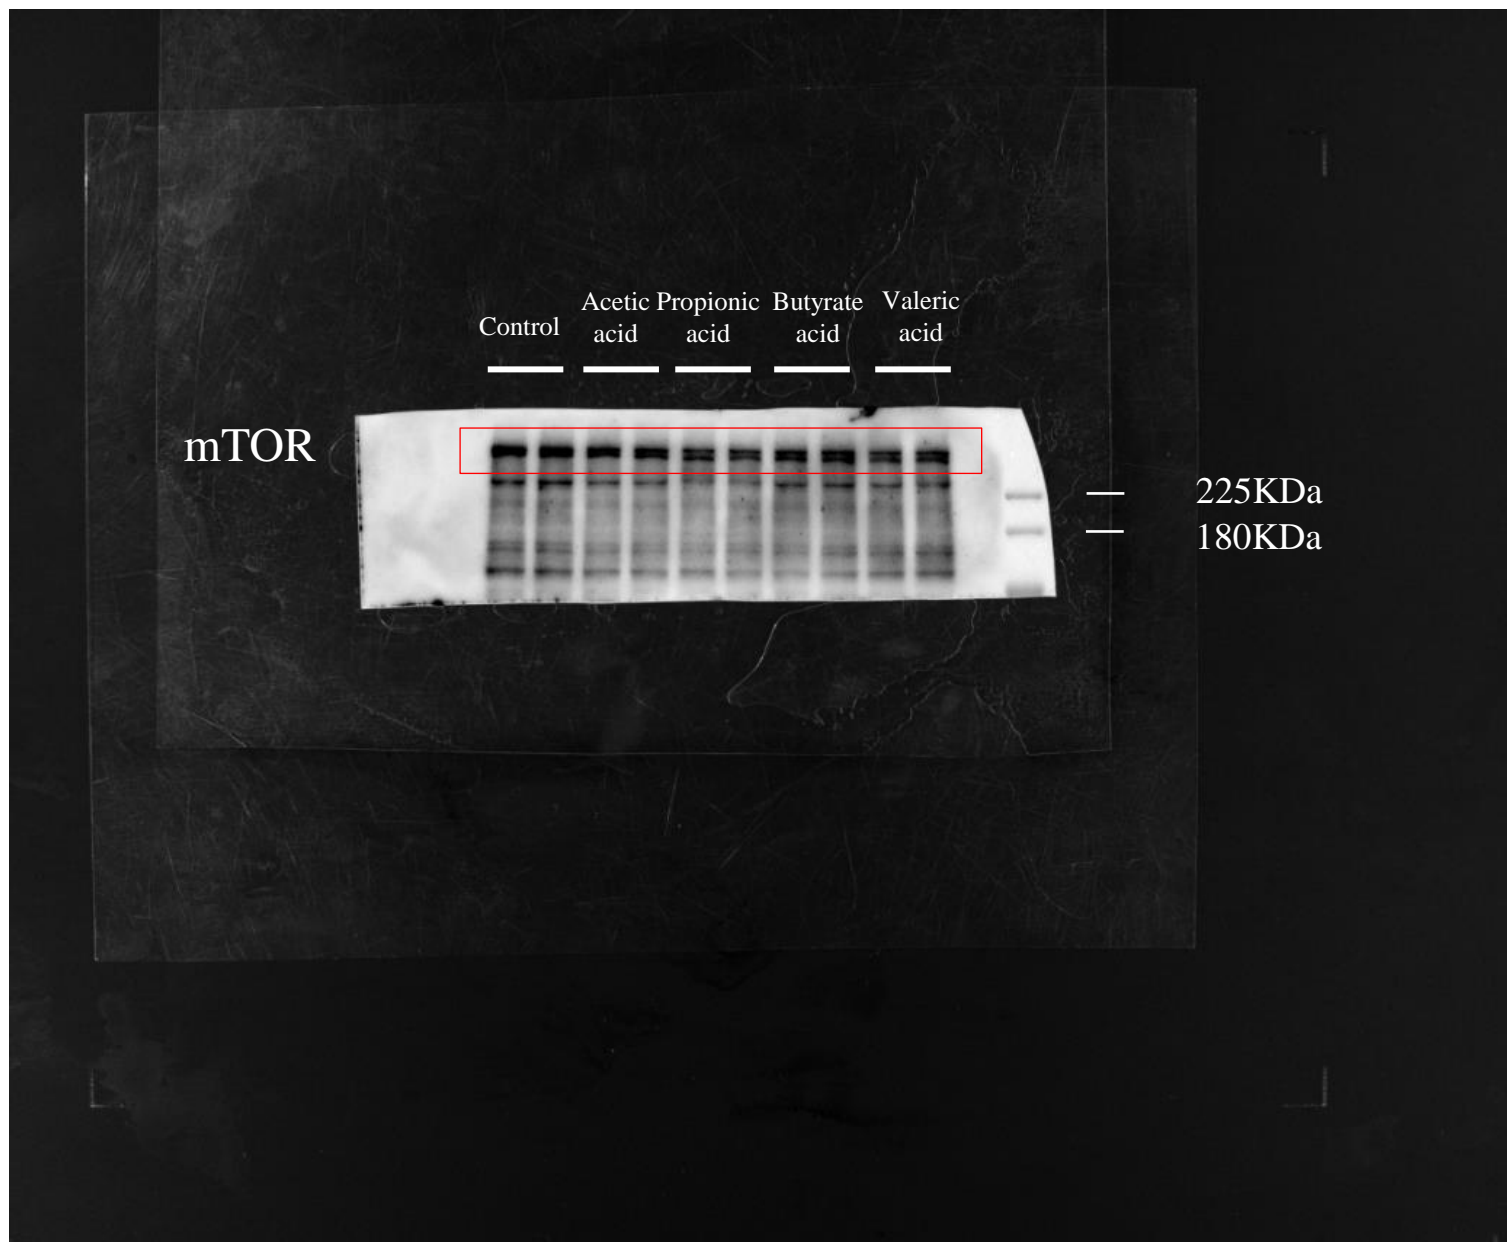

Figure 8F source data

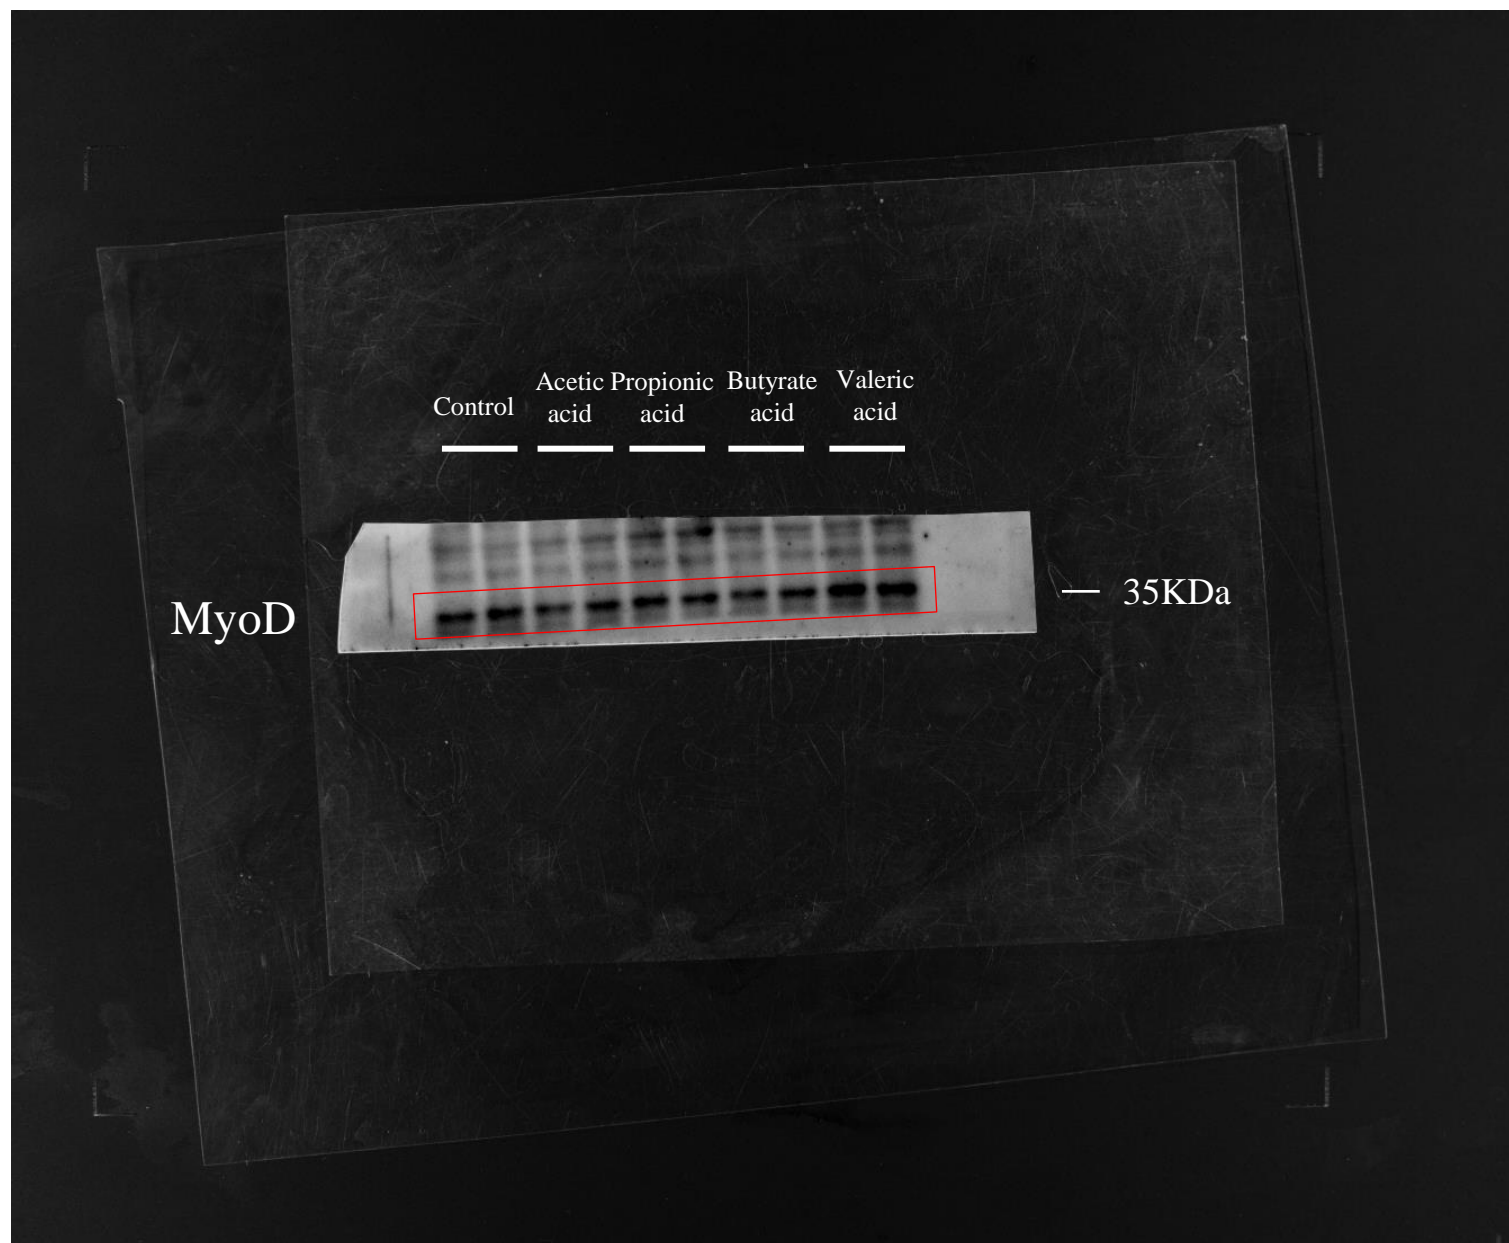

Figure 8F source data

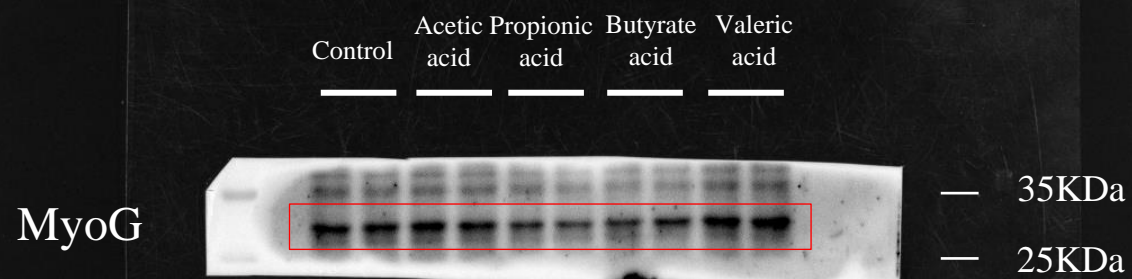



Figure 8F source data

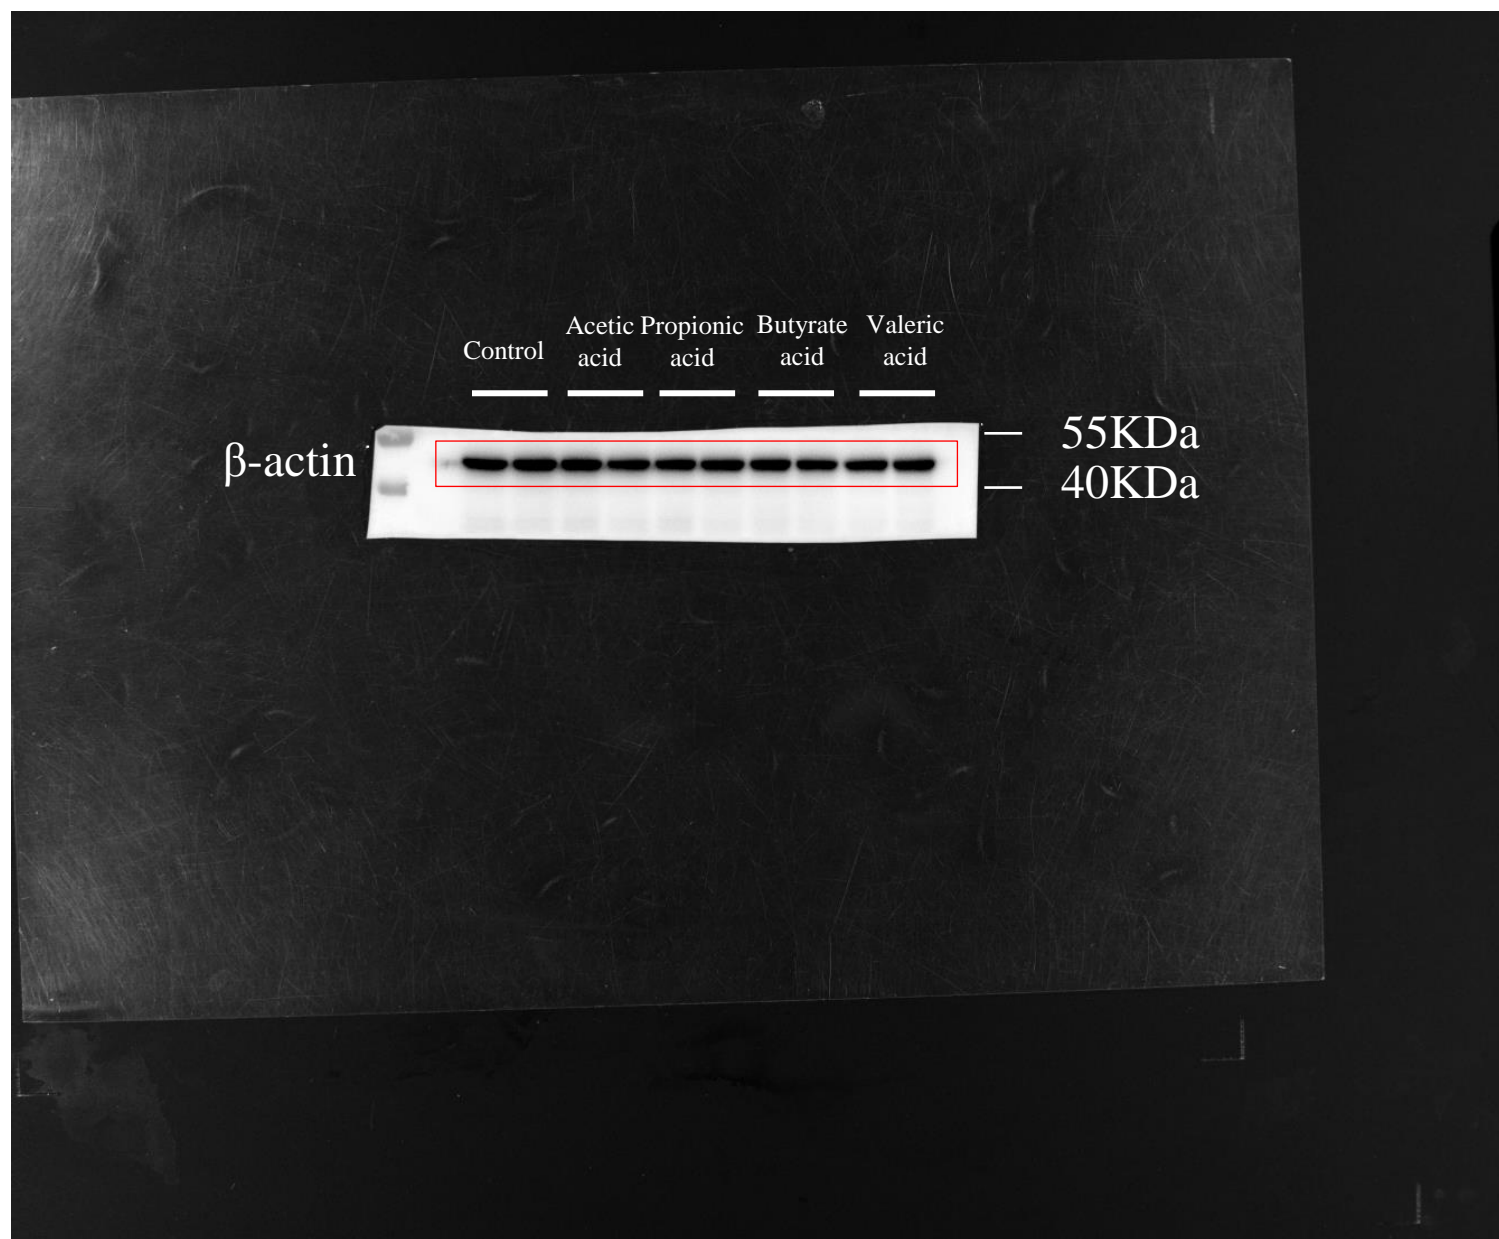

Supplement: fig8-data2 [file Raw western blot images for Figure 8.pdf › Figure 8-source data 2/Raw western blot images for Figure 8.pdf]
