# Supplementary material for: Fecal transplant from myostatin deletion pigs positively impacts the gut-muscle axis
Source: eLife journal article supplement (doi:10.7554/elife.81858), 2023-04-11
Supplement: fig9-data1 [file fig9.a.xlsx]

## Sheet: fig9.a
Con	_67935.tif	Total	939452		Dex	_67972.tif	Total	640632		Dex+Val	_67946.tif	Total	536429
		area	38674				area	16111				area	116801
		%	4.11666				area	88620				%	21.7738
							area	32856
	_67940.tif	Total	528675				area	10900			_67947.tif	Totaol	540708
		area	19215				area	11635				area	77516
		area	20882				area	8602				area	93279
		area	8837				area	23848				area	170795
		area	29719				area	34832				%	31.5873
		%	5.62141				area	227404
							%	35.4968			_67948.tif	Total	70326.4
	_67942.tif	Totaol	580979									area	16047.7
		area	34997			_68580.tif	Total	502314				%	22.819
		area	16224				area	186147
		area	18331				%	37.0579			_67949-1.tif	Totaol	685998
		area	69552									area	42874
		%	11.9715			_68581.tif	Total	767842				area	59244
							area	111035				area	70658
							area	138134				area	172776
							area	56419				%	25.1861
							area	305588
							%	39.7983			_68614.tif	Total	847060
												area	114045
						_68583.tif	Total	27398				%	13.4636
							area	8054.47
							%	29.398
						_68585.tif	Total	5.45531e+06
							area	541698
							area	217927
							area	141158
							area	390562
							area	1.29134e+06
							%	23.6714
	Damage area
Con	4.11666	5.62141	11.9715	4.01795
Dex	35.4968	37.0579	39.7983	29.398	23.6714
Dex+Val	25.1861	13.4636	21.7738	22.819	31.5873
Descriptives
f
	N	Mean	Std. Deviation	Std. Error	95% Confidence Interval for Mean		Minimum	Maximum
					Lower Bound	Upper Bound
1	4	6.43188	3.76527	1.88263	0.440501	12.4233	4.01795	11.9715
2	5	33.0845	6.49768	2.90585	25.0165	41.1524	23.6714	39.7983
3	5	22.9659	6.53822	2.92398	14.8477	31.0842	13.4636	31.5873
Total	14	21.8557	12.3119	3.29049	14.747	28.9644	4.01795	39.7983
Multiple Comparisons
Dependent Variable:f
	(I) e	(J) e	Mean Difference (I-J)	Std. Error	Sig.	95% Confidence Interval
						Lower Bound
LSD	1	2	-26.6526	3.95523	3.20601e-05	-35.358
		3	-16.5341	3.95523	0.00153576	-25.2395
	2	1	26.6526	3.95523	3.20601e-05	17.9472
		3	10.1185	3.72902	0.0201661	1.911
	3	1	16.5341	3.95523	0.00153576	7.82867
		2	-10.1185	3.72902	0.0201661	-18.3261
*. The mean difference is significant at the 0.05 level.
Multiple Comparisons
f Tukey HSD
(I) e	(J) e	Mean Difference (I-J)	Std. Error	Sig.	95% Confidence Interval
					Lower Bound	Upper Bound
1	2	-26.6526	3.95523	8.72643e-05	-37.3351	-15.9701
	3	-16.5341	3.95523	0.00401768	-27.2166	-5.85156
2	1	26.6526	3.95523	8.72643e-05	15.9701	37.3351
	3	10.1185	3.72902	0.0489396	0.0469676	20.1901
3	1	16.5341	3.95523	0.00401768	5.85156	27.2166
	2	-10.1185	3.72902	0.0489396	-20.1901	-0.0469676
*. The mean difference is significant at the 0.05 level.
