# Supplementary material for: Fecal transplant from myostatin deletion pigs positively impacts the gut-muscle axis
Source: eLife journal article supplement (doi:10.7554/elife.81858), 2023-04-11
Supplement: fig9-data2 [file fig9.b.xlsx]

## Sheet: fig9.b
	atrogin-1			murf-1			actin
Con	1	22387.5	0.784293	1	12764.6	0.447177	1	28544.8
	2	21378.1	0.987619	2	15793.4	0.729622	2	21646.1
Dex	3	25375.5	1.10996	3	21575.9	0.943759	3	22861.6
	4	28086.6	1.30926	4	23596.1	1.09993	4	21452.3
D+Val	5	22372.9	1.00716	5	19130.1	0.861181	5	22213.8
	6	24038.1	1.04233	6	21377.6	0.926971	6	23061.8
Con	1	23242.1	0.814231	1	12633.3	0.442577		28544.8
	2	21976.3	1.01526	2	15628.4	0.722		21646.1
Dex	3	25762.3	1.12688	3	21404.1	0.936243		22861.6
	4	28719.2	1.33875	4	23385.6	1.09012		21452.3
D+Val	5	24292.3	1.09357	5	18943.1	0.852762		22213.8
	6	26148.6	1.13385	6	21191.6	0.918905		23061.8
			atrogin-1				murf-1
Con	0.784293		0.871098		0.447177		0.763956
	0.987619		1.09693		0.729622		1.24648
	0.814231		0.90435		0.442577		0.756098
	1.01526	0.90035	1.12763		0.722	0.585344	1.23346
Dex	1.12996		1.25502		0.943759		1.61232
	1.30926		1.45417		1.09993		1.87912
	1.12688		1.2516		0.936243		1.59948
	1.33875		1.48692		1.09012		1.86236
D+Val	1.00716		1.11864		0.861181		1.47124
	1.04233		1.15769		0.926971		1.58363
	1.09357		1.2146		0.852762		1.45686
	1.13385		1.25934		0.918905		1.56986
Ttest		Con vs.Dex	0.00727433			Con vs.Dex	0.00345624
		Con vs.D+Val	0.0412558			Con vs.D+Val	0.0106524
		Dex vs.D+Val	0.0477288			Dex vs.D+Val	0.0397917
