# Supplementary material for: Fecal transplant from myostatin deletion pigs positively impacts the gut-muscle axis
Source: eLife journal article supplement (doi:10.7554/elife.81858), 2023-04-11
Supplement: fig9-data2 [file fig9.c.xlsx]

## Sheet: fig9.c
		CT value			ΔΔCT	average	fold	SE	errorbar	test	test
MuRF-1	Con	23.98
		24.02	24	22.8	0.435275
		23.53
		23.53	23.53	22.14	0.381565
		22.85
		23.22	23.035	21.71	0.399149
		23.63
		23.52	23.575	22.37	0.433769
		23.31											MuRF-1	Atrogin-1
		23.26	23.285	21.82	0.362236							Con	1	1
		23.17										Dex	6.1784	11.2479
		23.42	23.295	21.71	0.333325	0.390886	1	0.0164304	0.0420336			Dex+Val	1.44985	2.44066
	Dex	23										errorbar	0.0420336	0.135997
		22.99	22.995	22.76	0.849685							errorbar	0.359435	0.296347
		21.94										errorbar	0.217219	0.292702
		21.8	21.87	22.48	1.52626
		22.69
		22.03	22.36	22.75	1.31039
		20.32
		20.24	20.28	21.73	2.73208
		18.82
		19	18.91	21.41	5.65685	2.41505	6.1784	0.868055	0.359435	0.0295714
	D+Val	24.31
		24.35	24.33	21.38	0.129408
		22.79
		22.93	22.86	21.65	0.432269
		22.31
		22.46	22.385	21.89	0.709562
		23.75
		23.46	23.605	22.93	0.626332
		22.02
		22	22.01	22.05	1.02811
		22.03
		22.38	22.205	21.13	0.474671	0.566726	1.44985	0.123103	0.217219	0.045184	0.187208
Atrogin	Con	25.49
		25.42	25.455	22.57	0.135372
		25.55
		25.51	25.53	22.8	0.150726
		25.06
		24.88	24.97	22.14	0.140632
		24.05
		24.01	24.03	21.71	0.200267
		24.19
		24.09	24.14	22.37	0.293209
		23.89
		23.76	23.825	21.82	0.249135	0.19489	1	0.0265046	0.135997
	Dex	23.55
		23.61	23.58	22.48	0.466516
		21.48
		21.35	21.415	22.75	2.52275
		20.46
		20.52	20.49	21.73	2.36199
		19.24
		19.36	19.3	21.41	4.31691
		21.22
		21.32	21.27	21.64	1.29235	2.1921	11.2479	0.649623	0.296347	0.00785253
	D+Val	24.51
		24.32	24.415	21.38	0.122004
		23.67
		23.77	23.72	21.65	0.238159
		23.61
		23.67	23.64	21.89	0.297302
		23.73
		23.93	23.83	22.93	0.535887
		21.14
		21.11	21.125	21.22	1.06807
		21.89
		21.88	21.885	21.13	0.592546	0.475661	2.44066	0.139227	0.292702	0.0196839	0.075739
