# Supplementary material for: Fecal transplant from myostatin deletion pigs positively impacts the gut-muscle axis
Source: eLife journal article supplement (doi:10.7554/elife.81858), 2023-04-11
Supplement: fig9-data2 [file fig9.d.xlsx]

## Sheet: fig9.d1
	Con		Dex		Dex+Val
average	17.2995		12.4589		15.7528
SE	0.516654		0.324601		0.530451			Con	17.2995	0.516654
	12.6041		13.4443		18.4725			Dex	12.4589	0.324601
	18.3392		11.2261		18.8673			Dex+Val	15.7528	0.530451
	9.69623		14.3419		19.0249			Con vs. Dex	0.0001
	25.7811		21.3701		11.4371			Con vs. Dex+Val	0.02
	24.3031		14.973		17.8168			Dex vs. Dex+Val	0.0001
	24.4525		15.9271		11.705
	17.9901		10.3598		21.1342
	12.8591		16.3872		13.7562
	11.6835		14.5322		20.0284
	17.2049		9.7228		17.0593
	12.5615		12.8459		18.0483
	12.2451		9.07944		19.6243
	21.4783		14.1725		8.4497
	15.3532		17.4912		14.9018
	15.3092		11.2537		11.3809
	25.1644		15.5832		12.6983
	13.0805		13.7031		13.8607
	11.7574		15.8816		9.7089
	9.90402		10.4108		8.49993
	21.3014		13.4174		18.6987
	9.76452		13.5729		11.0867
	19.8182		19.4654		11.1454
	13.067		14.5864		15.812
	15.5797		14.9567		14.7254
	12.7027		8.81851		12.256						Descriptives
	17.3329		8.4302		26.7538		f
	11.0286		11.8541		12.9441							95% Confidence Interval for Mean
	17.3031		21.0661		12.0793			N	Mean	Std. Deviation	Std. Error	Lower Bound	Upper Bound	Minimum	Maximum
	17.6552		14.7686		14.1683		1	80	17.2995	4.62109	0.51665	16.2711	18.3279	9.7	31.37
	22.4624		12.6378		25.9254		2	90	12.4589	3.07943	0.3246	11.8139	13.1039	6.33	21.37
	17.0946		13.7591		15.1219		3	84	15.7528	4.86166	0.53045	14.6977	16.8078	8.45	34.63
	14.1324		16.2669		20.1044		Total	254	15.0728	4.68079	0.2937	14.4944	15.6512	6.33	34.63
	18.846		12.4486		17.7574
	21.5031		9.6408		16.5002
	14.2457		11.4475		17.6192					Multiple Comparisons
	12.092		12.6327		15.2217		Dependent Variable:f
	13.7729		11.9063		12.8454								95% Confidence Interval
	12.6398		11.3686		18.9494			(I) e	(J) e	Mean Difference (I-J)	Std. Error	Sig.	Lower Bound	Upper Bound
	16.466		14.6826		11.1245		LSD	1	2	4.84061*	0.6501	0	3.5603	6.121
	12.0081		10.1977		12.6901				3	1.54673*	0.66093	0.02	0.245	2.8484
	24.3492		12.8247		20.0361			2	1	-4.84061*	0.6501	0	-6.121	-3.5603
	15.1825		11.59		26.0322				3	-3.29389*	0.64185	0	-4.558	-2.0298
	16.9228		14.0825		21.5045			3	1	-1.54673*	0.66093	0.02	-2.8484	-0.245
	13.2239		12.0658		17.0602				2	3.29389*	0.64185	0	2.0298	4.558
	14.9333		12.9681		17.8699		*. The mean difference is significant at the 0.05 level.
	16.718		14.4115		13.1244
	11.2859		9.28373		9.41556
	14.6826		12.1148		15.3259
	12.1193		12.1371		17.0644
	14.7269		10.5267		18.9998
	15.438		11.9054		11.1445
	17.4493		9.44181		19.5819
	31.3707		11.0579		15.1016
	21.0155		11.1653		14.8839
	15.7322		11.5213		11.0959
	27.0717		13.6257		12.0379
	25.5506		6.4179		11.1183
	20.2122		7.69668		12.3225
	20.5034		8.23266		19.3349
	17.2962		9.57601		14.3788
	21.8993		6.325		16.4316
	21.9491		11.32		11.9446
	23.4411		9.72659		20.3478
	18.0542		16.6761		13.9116
	15.6563		12.2244		13.8322
	21.5162		11.9709		9.39676
	17.4457		11.3803		25.7983
	15.9638		8.93927		34.634
	16.4249		9.58565		18.6333
	18.9446		14.4701		26.7604
	18.737		19.8065		12.6191
	17.0755		10.1496		22.5148
	12.3462		15.0469		13.8501
	22.5464		17.8248		13.4127
	16.6335		13.7552		13.6089
	14.8395		12.9755		14.4432
	21.0183		6.56737		9.83819
	22.879		11.5894		20.5474
	24.3459		8.32621		8.76905
	13.8768		7.70088		8.93517
			11.06		12.4169
			11.7516		15.0067
			8.4271		13.572
			14.2923		14.5727
			10.7497
			9.14369
			14.4968
			13.1862
			14.4144
			14.1426

## Sheet: fig9.d2
Fusion index (%)
Control	19.2261
	18.4358
	21.89
	22.5467
Dex	15
	13.5011
	15.6013
	15.3318
Dex+Val	19.9353
	16.7279
	18
	17.0213
Control	20.5246
Dex	14.8586
Dex+Val	17.9211
SE	1.00011
SE	0.468882
SE	0.72438
Con vs. Dex	0.001
Con vs. Dex+Val	0.039
Dex vs. Dex+Val	0.019
					Descriptives
	f
						95% Confidence Interval for Mean
		N	Mean	Std. Deviation	Std. Error	Lower Bound	Upper Bound	Minimum	Maximum
	1	4	20.5246	2.00021	1.00011	17.3419	23.7074	18.44	22.55
	2	4	14.8586	0.93776	0.46888	13.3664	16.3508	13.5	15.6
	3	4	17.9211	1.44876	0.72438	15.6158	20.2264	16.73	19.94
	Total	12	17.7681	2.78448	0.80381	15.9989	19.5373	13.5	22.55
				Multiple Comparisons
	Dependent Variable:f
							95% Confidence Interval
		(I) e	(J) e	Mean Difference (I-J)	Std. Error	Sig.	Lower Bound	Upper Bound
	LSD	1	2	5.66608*	1.07851	0.001	3.2263	8.1058
			3	2.60350*	1.07851	0.039	0.1637	5.0433
		2	1	-5.66608*	1.07851	0.001	-8.1058	-3.2263
			3	-3.06258*	1.07851	0.019	-5.5023	-0.6228
		3	1	-2.60350*	1.07851	0.039	-5.0433	-0.1637
			2	3.06258*	1.07851	0.019	0.6228	5.5023
	*. The mean difference is significant at the 0.05 level.
