# Supplementary material for: Fecal transplant from myostatin deletion pigs positively impacts the gut-muscle axis
Source: eLife journal article supplement (doi:10.7554/elife.81858), 2023-04-11
Supplement: fig9-data2 [file fig9.e.xlsx]

## Sheet: fig9.e
			atrogin-1				murf-1
	Con	1	9844.45	0.396988		1	23342.5	0.941311	actin	1	24797.8
		2	9883.23	0.409197		2	19964.5	0.826593		2	24152.7
	Dex	3	22553.9	1.09239		3	25652.5	1.24248		3	20646.3
		4	23140.1	0.920933		4	24987.8	0.994468		4	25126.8
	D+Val	5	15191.1	0.630353		5	20740.2	0.860613		5	24099.3
		6	13740.1	0.596928		6	25603.8	1.11234		6	23017.9
	Con	1	9436.76	0.380548		1	23302.9	0.939714			24797.8
		2	9341.1	0.386752		2	20108.8	0.832567			24152.7
	Dex	3	22796.7	1.10416		3	26027.2	1.26062			20646.3
		4	23240.8	0.924941		4	25419.3	1.01164			25126.8
	D+Val	5	15009.1	0.622801		5	20467.6	0.849302			24099.3
		6	13347.3	0.579865		6	25524.5	1.1089			23017.9
		atrogin-1					murf-1
	Con	0.396988		1.0092		Con	0.941311		1.06357
		0.409197		1.04023			0.826593		0.933954
		0.380548		0.967402			0.939714		1.06177
		0.386752	0.393371	0.983173			0.832567	0.885047	0.940704
	Dex	1.09239		2.77701		Dex	1.24248		1.40385
		0.920933		2.34113			0.994468		1.12363
		1.10416		2.8069			1.26062		1.42436
		0.924941		2.35132			1.01164		1.14304
	D+Val	0.630353		1.60244		D+Val	0.860613		0.972393
		0.596928		1.51747			1.11234		1.25682
		0.622801		1.58324			0.849302		0.959613
		0.579865		1.47409			1.1089		1.25292
	Con vs. Dex	0.0001				Con vs. Dex	0.023
	Con vs. Dex+Val	0.013				Con vs. Dex+Val	0.296
	Dex vs. Dex+Val	0.0016				Dex vs. Dex+Val	0.135
atrogin-1					Descriptives						murf-1					Descriptives
	f											f
						95% Confidence Interval for Mean											95% Confidence Interval for Mean
		N	Mean	Std. Deviation	Std. Error	Lower Bound	Upper Bound	Minimum	Maximum				N	Mean	Std. Deviation	Std. Error	Lower Bound	Upper Bound	Minimum	Maximum
Con	1	4	1	0.03188	0.01594	0.9493	1.0507	0.97	1.04		Con	1	4	1	0.07242	0.03621	0.8848	1.1152	0.93	1.06
Dex	2	4	2.5691	0.25767	0.12883	2.1591	2.9791	2.34	2.81		Dex	2	4	1.2737	0.16251	0.08126	1.0151	1.5323	1.12	1.42
D+Val	3	4	1.5443	0.05929	0.02964	1.45	1.6387	1.47	1.6		D+Val	3	4	1.1104	0.16687	0.08343	0.8449	1.376	0.96	1.26
	Total	12	1.7045	0.69353	0.2002	1.2638	2.1451	0.97	2.81			Total	12	1.1281	0.17326	0.05002	1.018	1.2381	0.93	1.42
				Multiple Comparisons											Multiple Comparisons
	Dependent Variable:f											Dependent Variable:f
							95% Confidence Interval											95% Confidence Interval
		(I) e	(J) e	Mean Difference (I-J)	Std. Error	Sig.	Lower Bound	Upper Bound					(I) e	(J) e	Mean Difference (I-J)	Std. Error	Sig.	Lower Bound	Upper Bound
	LSD	1	2	-1.56909*	0.10872	0	-1.815	-1.3231				LSD	1	2	-.27372*	0.09958	0.023	-0.499	-0.0485
			3	-.54431*	0.10872	0.01	-0.7903	-0.2984						3	-0.11044	0.09958	0.296	-0.3357	0.1148
		2	1	1.56909*	0.10872	0	1.3231	1.815					2	1	.27372*	0.09958	0.023	0.0485	0.499
			3	1.02478*	0.10872	0.001	0.7788	1.2707						3	0.16328	0.09958	0.135	-0.062	0.3886
		3	1	.54431*	0.10872	0.001	0.2984	0.7903					3	1	0.11044	0.09958	0.296	-0.1148	0.3357
			2	-1.02478*	0.10872	0	-1.2707	-0.7788						2	-0.16328	0.09958	0.135	-0.3886	0.062
	*. The mean difference is significant at the 0.05 level.											*. The mean difference is significant at the 0.05 level.
