# Supplementary material for: Fecal transplant from myostatin deletion pigs positively impacts the gut-muscle axis
Source: eLife journal article supplement (doi:10.7554/elife.81858), 2023-04-11

Figure 9B source data

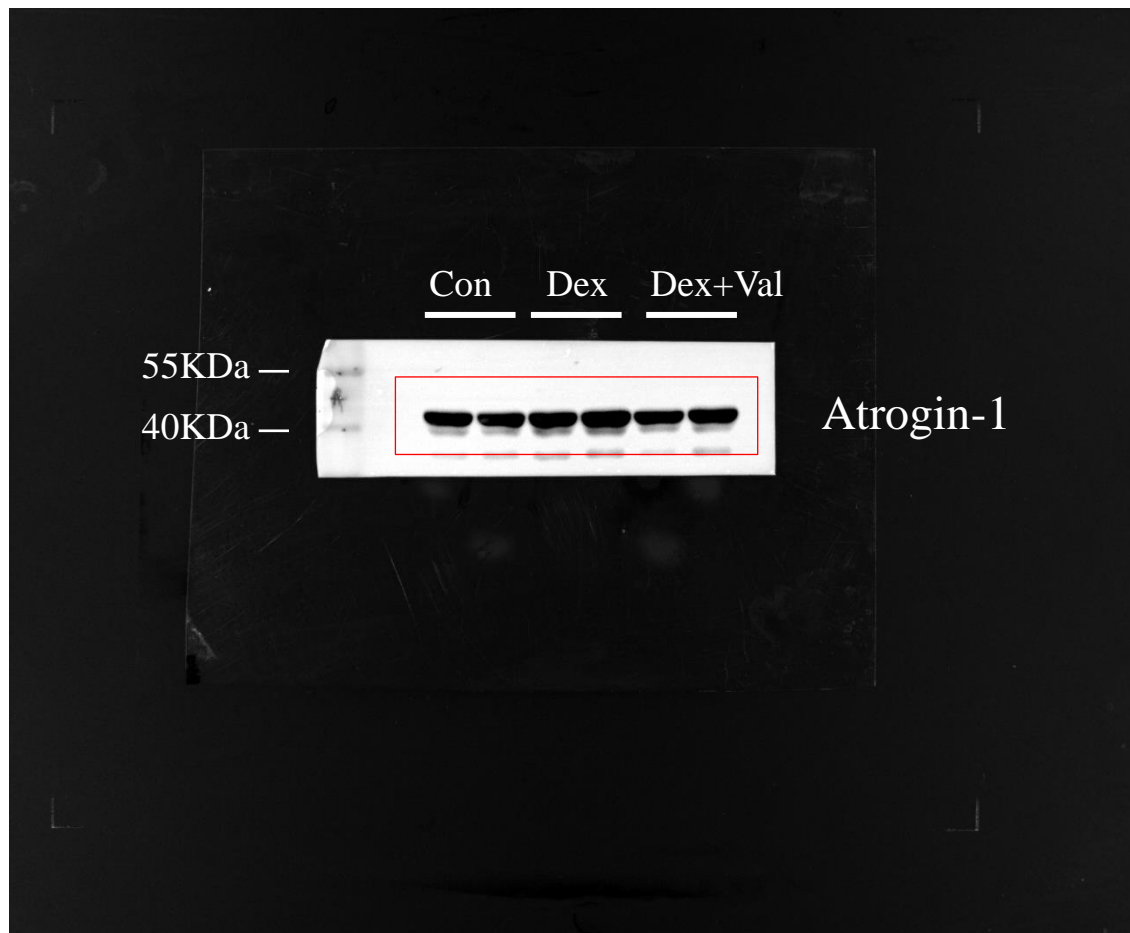

Figure 9B source data

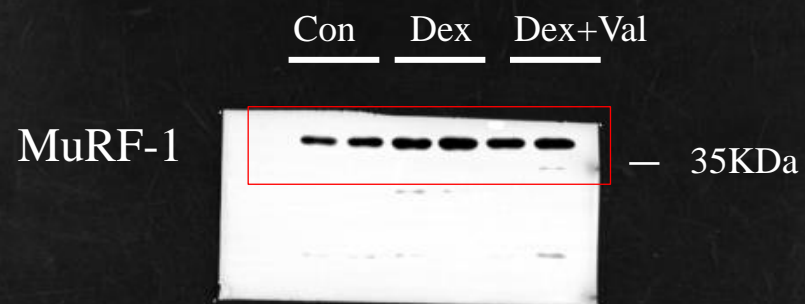

Figure 9B source data

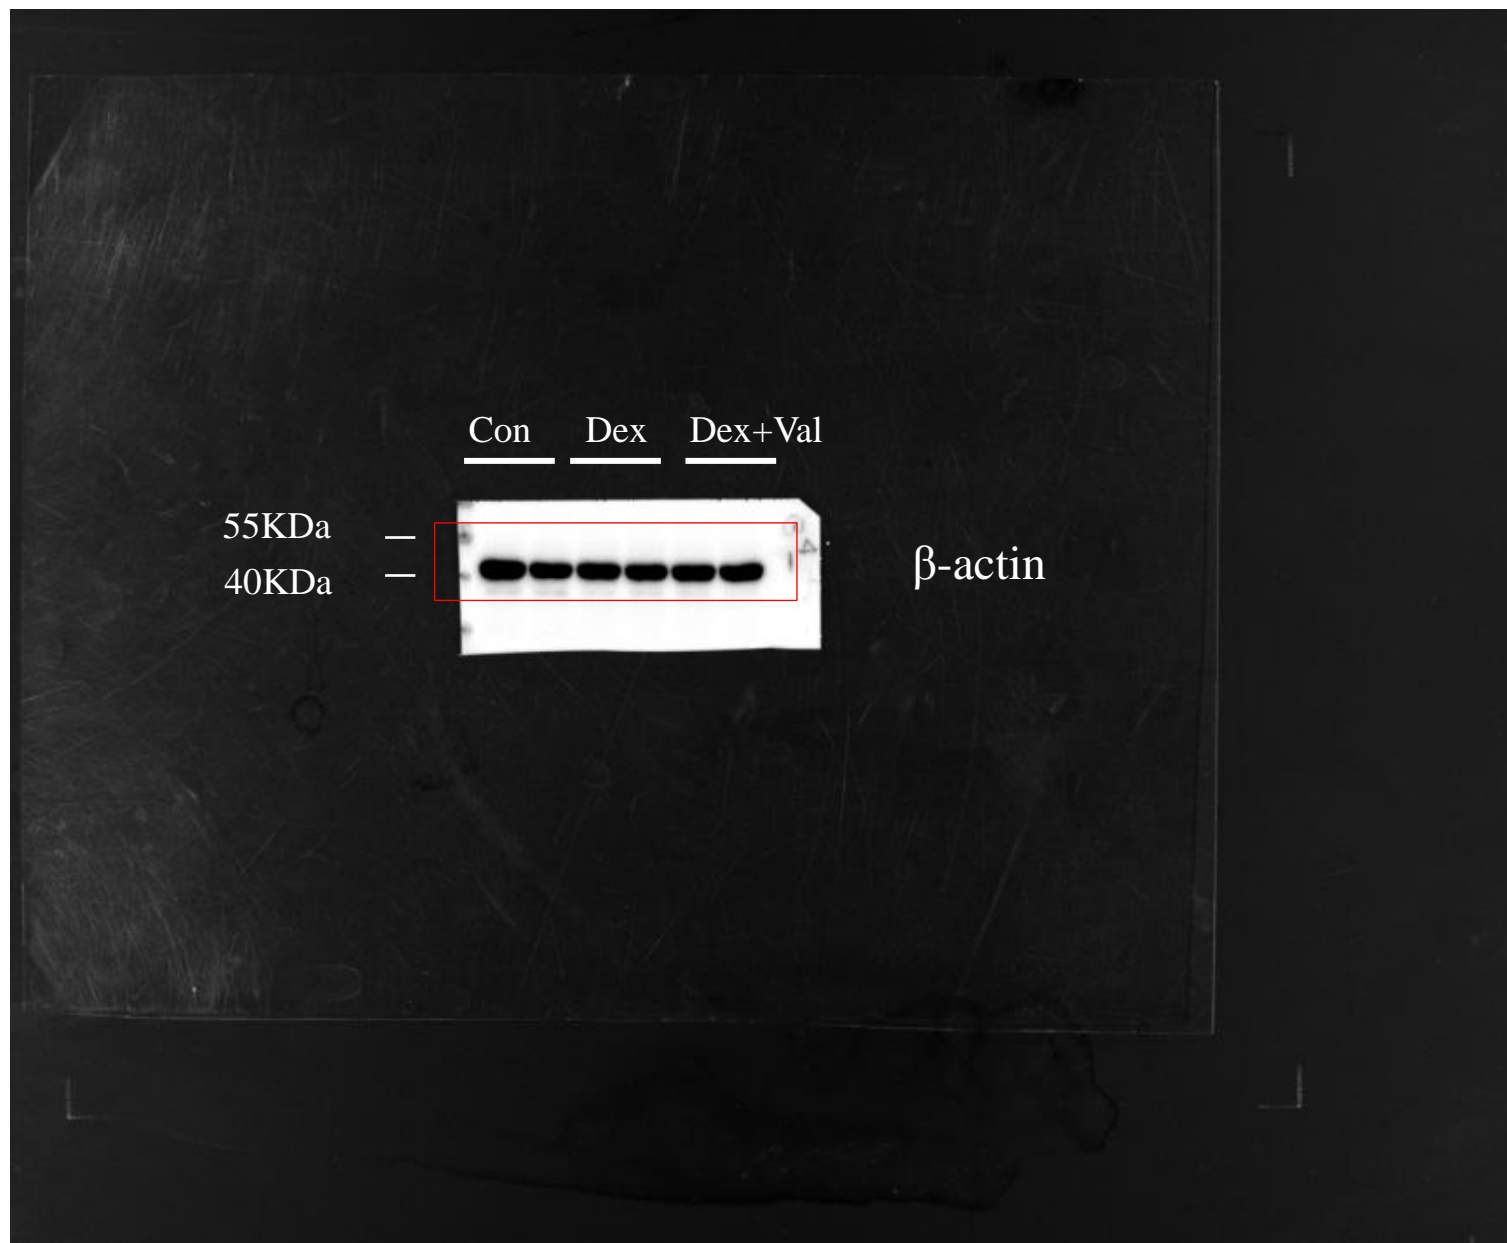

Figure 9E source data

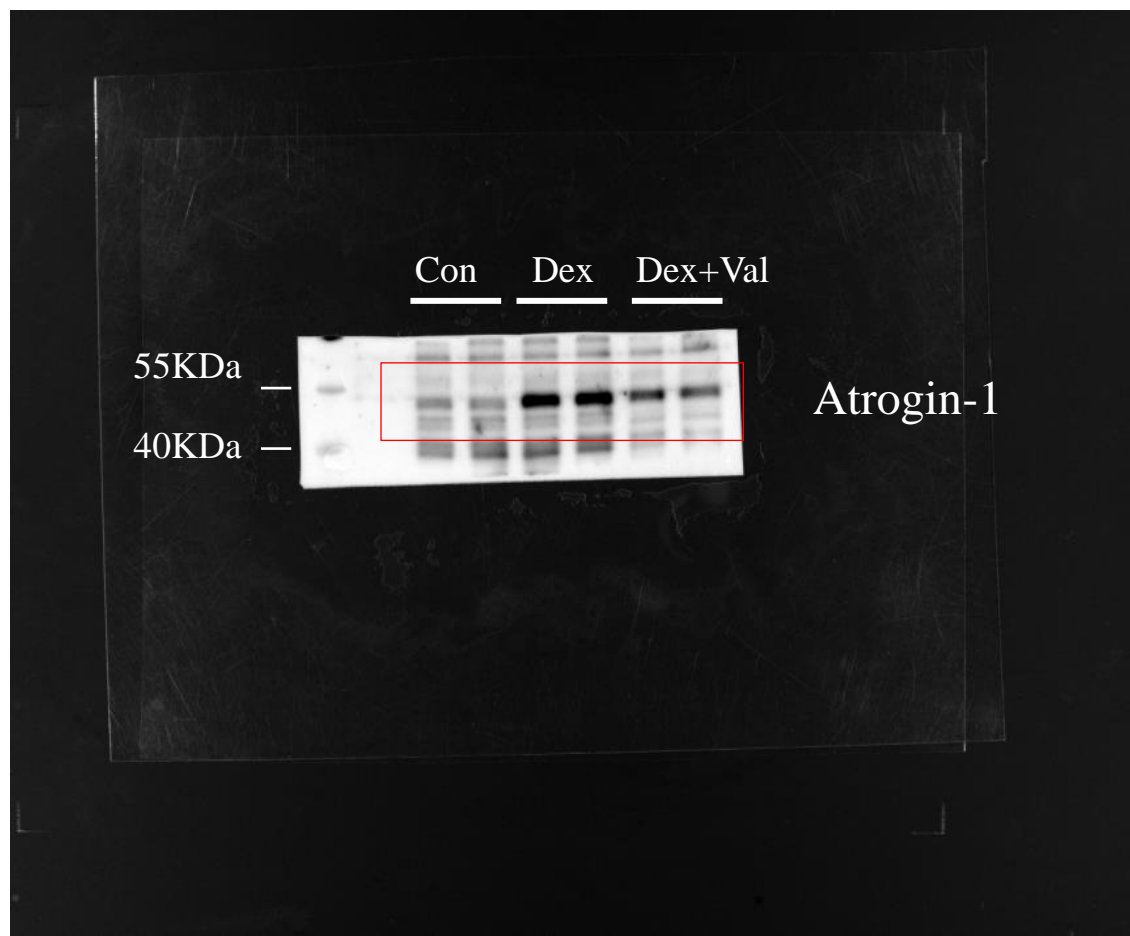

Figure 9E source data

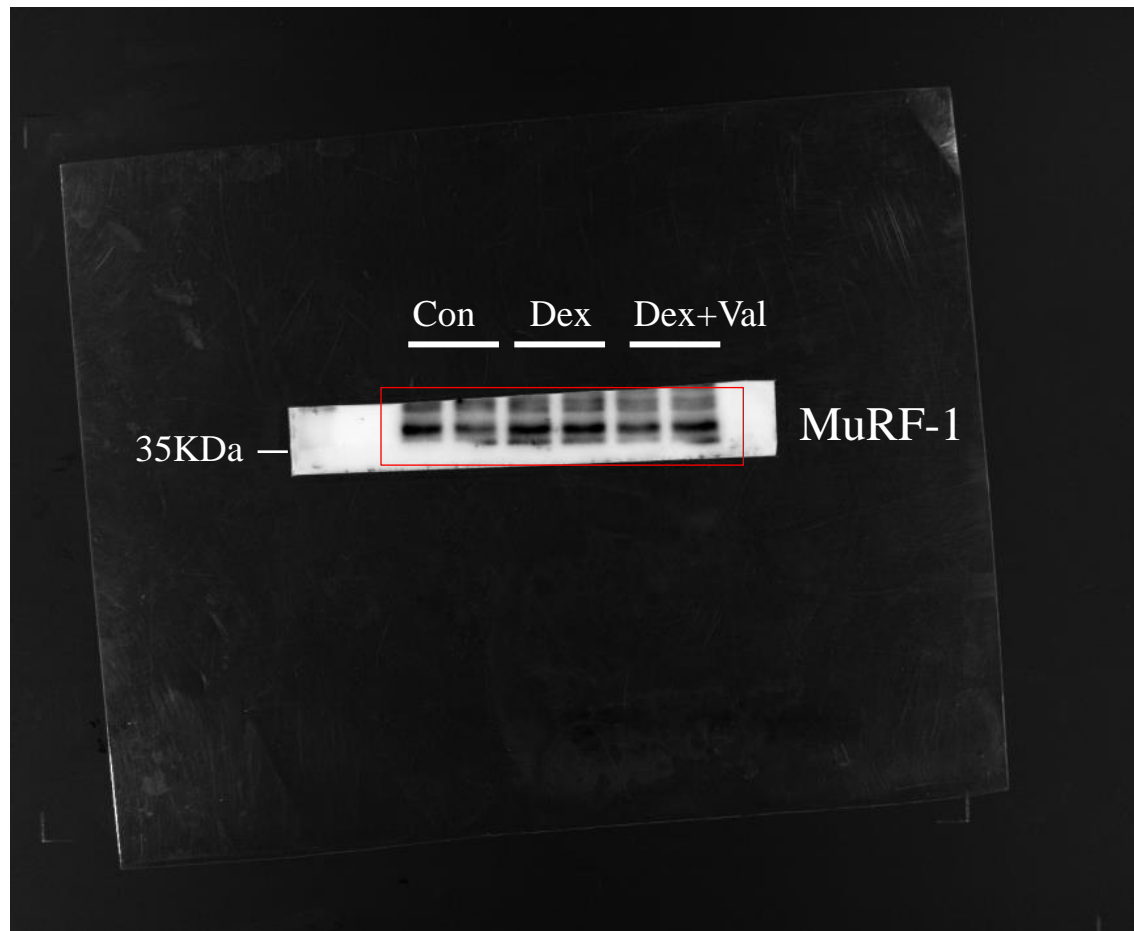

Figure 9E source data

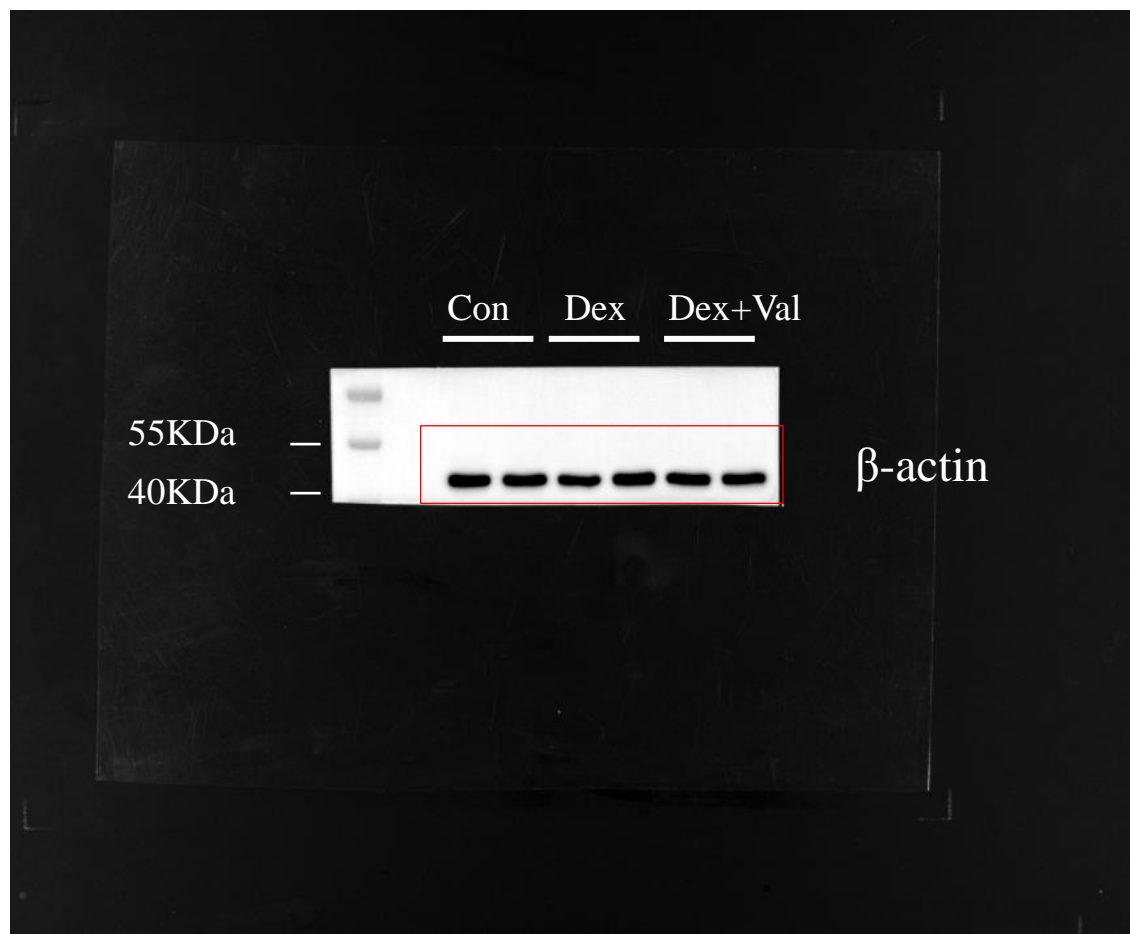

Supplement: fig9-data3 [file Raw western blot images for Figure 9.pdf › Figure 9-source data 3/Raw western blot images for Figure 9.pdf]
